# Supplementary material for: Highly efficient and concise synthesis of both antipodes of SB204900, clausenamide, neoclausenamide, homoclausenamide and ζ-clausenamide. Implication of biosynthetic pathways of clausena alkaloids
Source: Royal Society of Chemistry journal article supplement (doi:10.1039/b901965k), 2009-01-01
Supplement: b901965k.pdf [file b901965k.pdf]

Electronic Supplementary Information

**Highly Efficient and Concise Synthesis of Both Antipodes of SB204900,  
Clausenamide, Neoclausenamide, Homoclausenamide and (-)-Clausenamide,  
Implication of Biosynthetic Pathways of Clausena Alkaloids**

Luo Yang, De-Xian Wang, Qi-Yu Zheng, Jie Pan, Zhi-Tang Huang, Mei-Xiang Wang\*

Beijing National Laboratory for Molecular Sciences, CAS Laboratory of Molecular  
Recognition and Function, Institute of Chemistry, Chinese Academy of Sciences,

Beijing 100190, China

E-mail: [mxwang@iccas.ac.cn](mailto:mxwang@iccas.ac.cn)

**Table of Contents**

|                                                                                                                             |            |
|-----------------------------------------------------------------------------------------------------------------------------|------------|
| <b>1, General information.....</b>                                                                                          | <b>S1</b>  |
| <b>2, Synthetic procedures and characterization data of products.....</b>                                                   | <b>S2</b>  |
| <b>3, References.....</b>                                                                                                   | <b>S8</b>  |
| <b>4, HPLC analysis (+)22, (+)23, (+)7, (-)4, (-)3, (+)19, (-)20, (-)22, (-)23, (-)7, (+)4,<br/>(+)3, (-)19, (+)20.....</b> | <b>S11</b> |
| <b>5, Copies of <sup>1</sup>H and <sup>13</sup>C NMR spectra of products.....</b>                                           | <b>S19</b> |

**1, General information**

<sup>1</sup>H and <sup>13</sup>C NMR spectra were recorded on a Bruker Advance 300 spectrometer at ambient temperature. Chemical shifts are reported in ppm with either tetramethylsilane or the residual solvent resonance as an internal standard. Melting points are uncorrected. All yields reported were isolated yield and ee value were determined by HPLC using isopropanol and hexane (1:9) as eluent. All chemicals were dried or purified according to standard procedures prior to use. (+) and (-)-3-phenyloxirane-2-carboxamide **22**<sup>1,2</sup> were prepared following the literature methods.

## 2, Synthetic procedures and characterization data of products

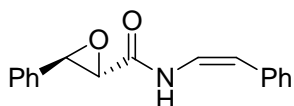

**(+)-23**: oil;  $[\alpha]_{\text{D}}^{25} +284^{\circ}$  ( $c$  1.0,  $\text{CHCl}_3$ ); {lit.<sup>3</sup> **(-)-23**,  $[\alpha]_{\text{D}}^{25} -282^{\circ}$  ( $c$  1.1,  $\text{CHCl}_3$ )}; IR (KBr)  $\nu$  3392, 1698, 1654  $\text{cm}^{-1}$ ;  $^1\text{H}$  NMR (300 MHz,  $\text{CDCl}_3$ )  $\delta$  8.45 (d,  $J = 11.1$  Hz, 1H), 7.24-7.41 (m, 10H), 6.94 (dd,  $J = 9.6, 11.1$  Hz, 1H), 5.86 (d,  $J = 9.6$  Hz, 1H), 3.92 (d,  $J = 1.9$  Hz, 1H), 3.59 (d,  $J = 2.0$  Hz, 1H).

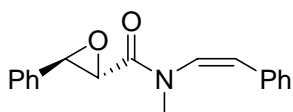

**(+)-SB204900 (+)-7**: oil;  $[\alpha]_{\text{D}}^{25} +14.2^{\circ}$  ( $c$  3.3,  $\text{CHCl}_3$ ); {lit.<sup>3</sup> **(-)-7**,  $[\alpha]_{\text{D}}^{25} -16^{\circ}$  ( $c$  3.3,  $\text{CHCl}_3$ )}; IR (KBr)  $\nu$  1673, 1637  $\text{cm}^{-1}$ ;  $^1\text{H}$  NMR (300 MHz,  $\text{CDCl}_3$ )  $\delta$  6.96-7.26 (m, 10H), 6.33 (d,  $J = 8.6$  Hz, 1H), 6.20 (d,  $J = 8.6$  Hz, 1H), 3.79 (d,  $J = 1.7$  Hz, 1H), 3.76 (d,  $J = 1.8$  Hz, 1H), 3.12 (s, 3H).

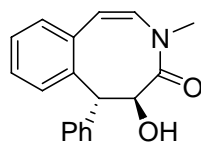

**(-)- $\xi$ -Clausenamide (-)-4**: oil;  $[\alpha]_{\text{D}}^{25} -140.3^{\circ}$  ( $c$  0.91,  $\text{CHCl}_3$ ); {lit.<sup>3</sup> **(+)-4**,  $[\alpha]_{\text{D}}^{25} +147^{\circ}$  ( $c$  1.1,  $\text{CHCl}_3$ )}; IR (KBr)  $\nu$  3361, 1644  $\text{cm}^{-1}$ ;  $^1\text{H}$  NMR (300 MHz,  $\text{CDCl}_3$ )  $\delta$  7.10-7.25 (m, 9H), 6.82 (d,  $J = 8.3$  Hz, 1H), 6.17 (d,  $J = 8.3$  Hz, 1H), 5.09 (t,  $J = 9.2$  Hz, 1H), 4.13 (d,  $J = 9.6$  Hz, 1H), 3.54 (d,  $J = 8.9$  Hz, 1H), 2.94 (s, 3H).

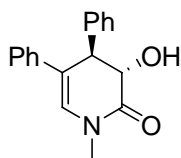

**(-)-Homoclausenamide (-)-3**: oil;  $[\alpha]_{\text{D}}^{25} -265^{\circ}$  ( $c$  2.50,  $\text{CH}_2\text{Cl}_2$ ); IR (KBr)  $\nu$  3259, 1664, 1633  $\text{cm}^{-1}$ ;  $^1\text{H}$  NMR (300 MHz,  $\text{CDCl}_3$ , 300K)  $\delta$  7.04-7.25 (m, 10H), 6.42 (d,  $J = 1.8$  Hz, 1H), 4.35 (dd,  $J = 2.6, 10.0$  Hz, 1H), 4.20 (dd,  $J = 1.7, 10.0$  Hz, 1H), 3.68 (d,  $J = 2.6$  Hz, 1H), 3.24 (s, 3H);  $^{13}\text{C}$  NMR (75 MHz,  $\text{CDCl}_3$ , 300K)  $\delta$  169.2, 139.0, 137.7,

128.7, 128.6, 128.2, 127.1, 126.6, 126.1, 120.8, 73.3, 49.6, 34.3; MS (ESI): 279 [M]<sup>+</sup>(59), 261(38), 250(100). Anal. Calcd. for C<sub>18</sub>H<sub>17</sub>NO<sub>2</sub>: C, 77.40; H, 6.13; N, 5.01. Found: C, 77.11; H, 6.19; N, 5.10.

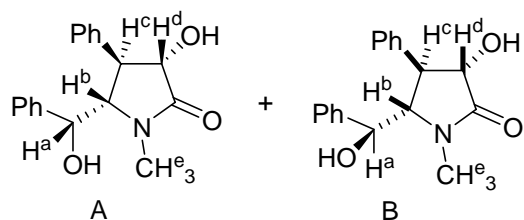

**2+2'** (3 : 7): oil; IR (KBr)  $\nu$  3439, 3194, 1685 cm<sup>-1</sup>; <sup>1</sup>H NMR (300 MHz, *d*<sub>6</sub>-DMSO, 300K)  $\delta$  6.63-7.26 (m, 10H), 5.77 (d, *J* = 4.6 Hz, 0.30H), 5.60 (d, *J* = 6.5 Hz, 0.30H), 5.48 (d, *J* = 4.0 Hz, 0.70H), 5.40 (d, *J* = 6.3 Hz, 0.70H), H<sub>A</sub><sup>a</sup>, 5.01 (t, *J* = 3.1 Hz, 0.30H), H<sub>B</sub><sup>a</sup> 4.64 (t, *J* = 2.9 Hz, 0.70H), H<sub>B</sub><sup>b</sup> 4.29 (dd, *J* = 2.1, 8.4 Hz, 0.70H), H<sub>A</sub><sup>b</sup>, H<sub>A</sub><sup>d</sup>, H<sub>B</sub><sup>d</sup> 3.78-3.92 (m, 1.30H), H<sub>B</sub><sup>c</sup> 3.51 (dd, *J* = 8.6, 10.8 Hz, 0.70H), H<sub>A</sub><sup>c</sup>, 3.06 (t, *J* = 7.2, 0.30H), H<sub>B</sub><sup>e</sup> 3.01 (s, 2.10H), H<sub>A</sub><sup>e</sup> 2.92 (s, 0.90H); <sup>13</sup>CNMR (75 MHz, CDCl<sub>3</sub>, 300K)  $\delta$  179.4, 178.1, 147.2, 145.1, 141.5, 133.9, 133.0, 132.9, 132.8, 132.7, 132.5, 132.2, 132.0, 132.8, 131.5, 131.3, 131.0, 82.3, 77.2, 73.8, 72.8, 70.3, 54.4, 51.7, 35.6, 33.1; MS (EI): 297[M]<sup>+</sup>(3), 279(6), 190(100), 191(52), 174(28), 173(78).

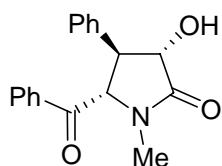

**(+)-Neoclausenamidone (+)-19**: mp 174-176°C, [ $\alpha$ ]<sub>D</sub><sup>25</sup> +14.3° (*c* 0.56, CHCl<sub>3</sub>); {lit.<sup>2</sup> (-)-neoclausenamidone, mp 165-169°C, [ $\alpha$ ]<sub>D</sub><sup>25</sup> -14.55° (*c* 0.50, CHCl<sub>3</sub>)}; IR (KBr)  $\nu$  3276, 1684 cm<sup>-1</sup>; <sup>1</sup>H NMR (300 MHz, CDCl<sub>3</sub>)  $\delta$  7.17-7.67 (m, 10H), 5.09 (d, *J* = 6.5 Hz, 1H), 4.48 (dd, *J* = 3.8, 6.5 Hz, 1H), 3.29 (t, *J* = 6.5 Hz, 1H), 3.09 (d, *J* = 3.8 Hz, 1H), 2.95 (s, 3H).

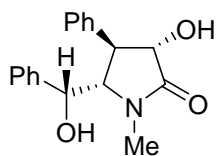

**(-)-Neoclausenamide (-)-2:** mp 187-188°C,  $[\alpha]_{\text{D}}^{25}$  -87.8° (*c* 0.41, CH<sub>3</sub>OH); {lit.<sup>5</sup> (+)-neoclausenamide, mp 179.6-181.4°C,  $[\alpha]_{\text{D}}^{25}$  +87.7° (*c* 0.13, CH<sub>3</sub>OH)}; IR (KBr)  $\nu$  3416, 1692 cm<sup>-1</sup>; <sup>1</sup>H NMR (300 MHz, *d*<sub>6</sub>-DMSO)  $\delta$  6.84-7.26 (m, 10H), 5.72 (d, *J* = 4.5 Hz, 1H), 5.57 (d, *J* = 5.7 Hz, 1H), 5.00 (t, *J* = 3.4 Hz, 1H), 3.85-3.92 (m, 2H), 3.06 (t, *J* = 7.1, Hz, 1H), 2.91 (s, 3H).

**(±)-Clausenamidone (±)-20:**

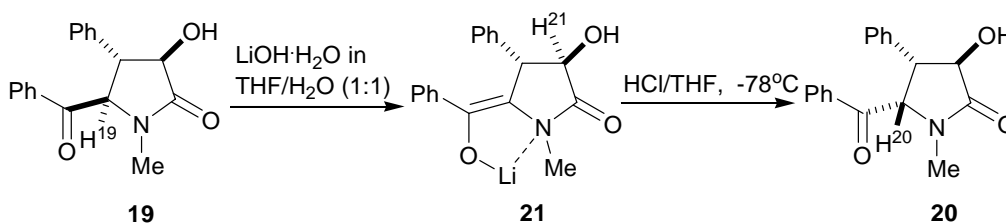

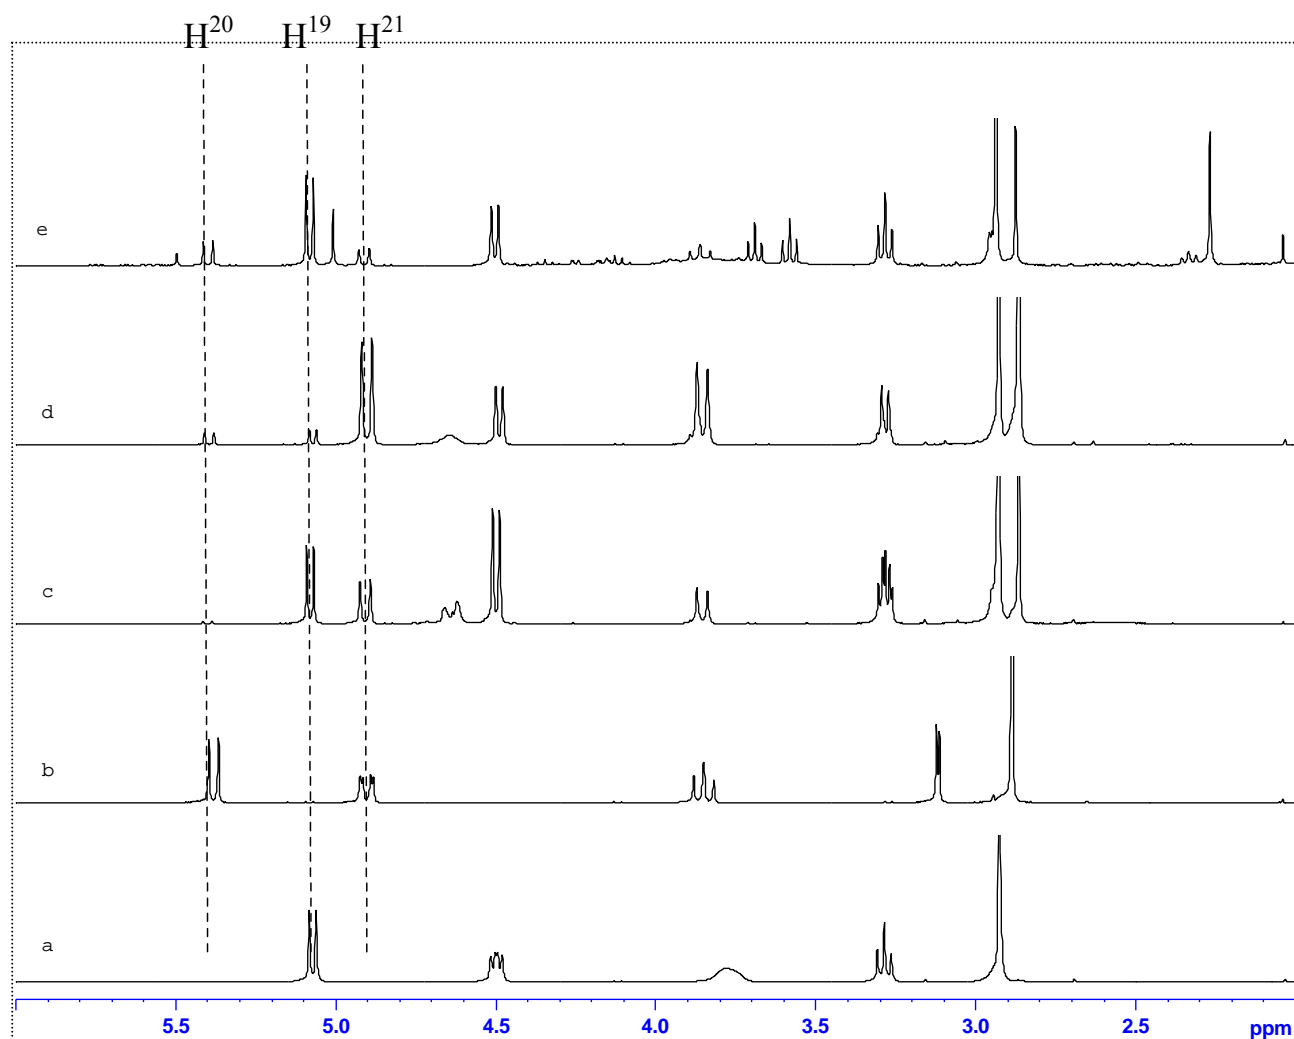

- a.  $^1\text{H}$  NMR spectrum of racemic **19** (0.04 mmol, 12 mg) in  $\text{CDCl}_3$  (0.5 mL) at room temperature.
- b.  $^1\text{H}$  NMR spectrum of racemic **20** (0.04 mmol, 12 mg) in  $\text{CDCl}_3$  (0.5 mL) at room temperature.
- c.  $^1\text{H}$  NMR spectrum of a mixture of racemic **19** (0.04 mmol, 12 mg) and  $\text{LiOH} \cdot 2\text{H}_2\text{O}$  (0.08 mmol, 3.4 mg) in  $\text{CDCl}_3$  (0.45 mL) and  $\text{D}_2\text{O}$  (0.05 mL) at room temperature after 12 h.
- d.  $^1\text{H}$  NMR spectrum of a mixture of racemic **20** (0.04 mmol, 12 mg) and  $\text{LiOH} \cdot 2\text{H}_2\text{O}$  (0.08 mmol, 3.4 mg) in  $\text{CDCl}_3$  (0.45 mL) and  $\text{D}_2\text{O}$  (0.05 mL) at room temperature after 12 h.
- e. To a mixture of racemic ( $\pm$ )-**19** (0.5 mmol, 148 mg) in THF (5 mL) and water (5 mL) was added  $\text{LiOH} \cdot 2\text{H}_2\text{O}$  (1 mmol, 42 mg). After stirring for 12 h at room temperature, the reaction flask was cooled down to  $-78\text{ }^\circ\text{C}$ , and the mixture was kept

stirring for another 12 h. The precipitate was observed in the mixture. While keeping at  $-78\text{ }^{\circ}\text{C}$ , a solution of aqueous hydrochloric acid in THF (2 N, 1 mL) [prepared from concentrate hydrochloric acid (12 N) and THF] was added through a syringe. The temperature of the reaction mixture was then allowed to rise to room temperature gradually for about 2 h. Water (50 mL) was added and the mixture was extracted with ethyl acetate (50 mL  $\times$  3). Organic layer was combined and dried over with anhydrous  $\text{Na}_2\text{SO}_4$ . After filtration and concentration under vacuum, the crude sample (10 mg) was dissolved in  $\text{CDCl}_3$  (0.5 mL) and the  $^1\text{H}$  NMR was recorded. The ratio of **20** : **19** : **21** was roughly determined by measuring proton peaks of  $\text{H}^{19}$ ,  $\text{H}^{20}$  and  $\text{H}^{21}$ . In spectrum c, **20** : **19** : **21** = 2 : 55 : 43. In spectrum d, **20** : **19** : **21** = 7 : 10 : 83. In spectrum e, **20** : **19** : **21** = 18 : 60 : 22.

**(-)-Clausenamidone (-)-20**: mp  $195\text{-}197\text{ }^{\circ}\text{C}$ ,  $[\alpha]_{\text{D}}^{25} -345^{\circ}$  ( $c$  0.29,  $\text{CH}_3\text{OH}$ ) {lit.<sup>2</sup> (+)-clausenamidone, mp  $203\text{-}206\text{ }^{\circ}\text{C}$ ,  $[\alpha]_{\text{D}}^{25} +333^{\circ}$  ( $c$  0.01,  $\text{CH}_3\text{OH}$ )}; IR (KBr)  $\nu$  3331, 1692  $\text{cm}^{-1}$ ;  $^1\text{H}$  NMR (300 MHz,  $\text{CDCl}_3$ )  $\delta$  7.02-7.54 (m, 10H), 5.38 (d,  $J = 8.9$  Hz, 1H), 4.90 (dd,  $J = 2.5, 9.9$  Hz, 1H), 3.85 (t,  $J = 9.2$  Hz, 1H), 3.12 (t,  $J = 2.6$  Hz, 1H), 2.89 (s, 3H).

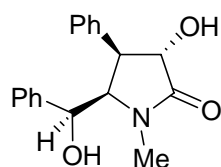

**(-)-Clausenamide (-)-1**: mp  $176\text{-}178\text{ }^{\circ}\text{C}$ .  $[\alpha]_{\text{D}}^{25} -123^{\circ}$  ( $c$  0.26,  $\text{DMSO}:\text{H}_2\text{O} = 9:1$  (v/v)); {lit.<sup>6</sup> (+)-clausenamide, mp  $152\text{-}153\text{ }^{\circ}\text{C}$ ,  $[\alpha]_{\text{D}}^{25} +123.19^{\circ}$  ( $c$  0.46,  $\text{DMSO} : \text{H}_2\text{O} = 9:1$  (v/v))}; IR (KBr)  $\nu$  3408, 3207, 1688  $\text{cm}^{-1}$ ;  $^1\text{H}$  NMR (300 MHz,  $d_6$ -DMSO)  $\delta$  0.04-7.26 (m, 8H); 6.63-6.66 (m, 2H); 5.45 (d,  $J = 4.0$  Hz, 1H), 5.38 (d,  $J = 6.3$  Hz, 1H), 4.64 (s, 1H), 4.29 (dd,  $J = 2.0, 8.3$  Hz, 1H), 3.81 (dd,  $J = 6.4, 11.0$  Hz, 1H), 3.50 (dd,  $J = 8.5, 10.8$  Hz, 1H), 3.01 (s, 3H).

**The procedures for the synthesis of (-)-7<sup>3</sup>, ( $\pm$ )-7<sup>3</sup>, (+)-3, (+)-4<sup>3</sup>, ( $\pm$ )-13<sup>4</sup>, ( $\pm$ )-15<sup>4</sup> and ( $\pm$ )-15<sup>4</sup>, (-)-19, (+)-2, (+)-20, and (+)-1 were the same as their enantiomers. The**

characterization of ( $\pm$ )-**7**<sup>3</sup>, (+)-**4**<sup>3</sup>, ( $\pm$ )-**14**<sup>4</sup>, ( $\pm$ )-**15**<sup>4</sup> and ( $\pm$ )-**15'**<sup>4</sup> was reported in our preliminary communications.

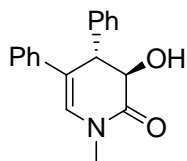

**(+)-Homoclausenamide (+)-3**: Yield, 62%; oil,  $[\alpha]_{\text{D}}^{25} +265^{\circ}$  (*c* 2.50,  $\text{CH}_2\text{Cl}_2$ ); IR (KBr)  $\nu$  3259, 1664, 1633  $\text{cm}^{-1}$ ;  $^1\text{H}$  NMR (300 MHz,  $\text{CDCl}_3$ , 300K)  $\delta$  7.05-7.25 (m, 10H), 6.42 (d,  $J = 1.7$  Hz, 1H), 4.35 (dd,  $J = 2.5, 10.0$  Hz, 1H), 4.20 (dd,  $J = 1.6, 10.0$  Hz, 1H), 3.66 (d,  $J = 2.6$  Hz, 1H), 3.23 (s, 3H).

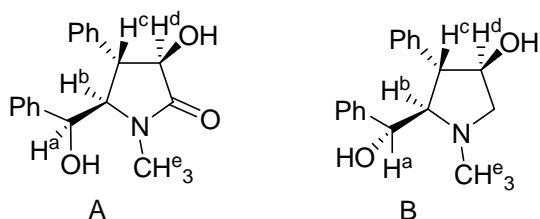

**(+)-2 + 2'** (3 : 7): Yield, 75%; oil; IR (KBr)  $\nu$  3440, 3207, 1686  $\text{cm}^{-1}$ ;  $^1\text{H}$  NMR (300 MHz,  $d_6$ -DMSO, 300K)  $\delta$  6.63-7.25 (m, 10H), 5.75 (d,  $J = 4.7$  Hz, 0.30H), 5.59 (d,  $J = 6.4$  Hz, 0.30H), 5.47 (d,  $J = 4.0$  Hz, 0.70H), 5.39 (d,  $J = 6.3$  Hz, 0.70H),  $\text{H}_\text{A}^{\text{a}}$ , 5.00 (t,  $J = 4.2$  Hz, 0.30H),  $\text{H}_\text{B}^{\text{a}}$  4.64 (t,  $J = 2.5$  Hz, 0.70H),  $\text{H}_\text{B}^{\text{b}}$  4.29 (dd,  $J = 2.3, 8.3$  Hz, 0.70H),  $\text{H}_\text{A}^{\text{b}}$ ,  $\text{H}_\text{A}^{\text{d}}$ ,  $\text{H}_\text{B}^{\text{d}}$  3.79-3.90 (m, 1.30H),  $\text{H}_\text{B}^{\text{c}}$  3.50 (dd,  $J = 8.4, 10.8$  Hz, 0.70H),  $\text{H}_\text{A}^{\text{c}}$ , 3.06 (t,  $J = 7.2$ , 0.30H),  $\text{H}_\text{B}^{\text{e}}$  3.01 (s, 2.10H),  $\text{H}_\text{A}^{\text{e}}$  2.91 (s, 0.90H).

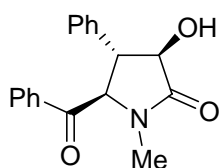

**(-)-Neoclausenamidone (-)-19**: Yield, 91%; mp 174-176 $^{\circ}\text{C}$ ,  $[\alpha]_{\text{D}}^{25} -14.3^{\circ}$  (*c* 0.56,  $\text{CHCl}_3$ ); {lit.<sup>2</sup> (-)-neoclausenamidone, mp 165-169 $^{\circ}\text{C}$ ,  $[\alpha]_{\text{D}}^{25} -14.55^{\circ}$  (*c* 0.50,  $\text{CHCl}_3$ )}; IR (KBr)  $\nu$  3276, 1684  $\text{cm}^{-1}$ ;  $^1\text{H}$  NMR (300 MHz,  $\text{CDCl}_3$ )  $\delta$  7.17-7.67 (m, 10H), 5.07 (d,  $J = 6.5$  Hz, 1H), 4.50 (dd,  $J = 4.1, 6.4$  Hz, 1H), 3.78 (b, 1H), 3.29 (t,  $J = 6.5$  Hz, 1H), 2.93 (s, 3H).

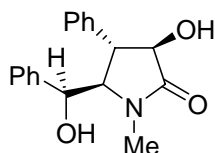

**(+)-Neoclausenamide (+)-2:** mp 187-188°C,  $[\alpha]_{\text{D}}^{25} +87.8^\circ$  (*c* 0.41, CH<sub>3</sub>OH); {lit.<sup>5</sup> (+)-neoclausenamide, mp 179.6-181.4°C,  $[\alpha]_{\text{D}}^{25} +87.7^\circ$  (*c* 0.13, CH<sub>3</sub>OH)}; IR (KBr)  $\nu$  3417, 1692 cm<sup>-1</sup>; <sup>1</sup>H NMR (300 MHz, *d*<sub>6</sub>-DMSO)  $\delta$  6.85-7.25 (m, 10H), 5.73 (d, *J* = 4.6 Hz, 1H), 5.60 (d, *J* = 6.4 Hz, 1H), 5.00 (t, *J* = 3.4 Hz, 1H), 3.86-3.92 (m, 2H), 3.06 (t, *J* = 7.2, Hz, 1H), 2.91 (s, 3H).

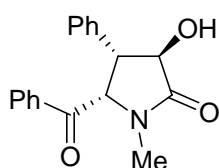

**(+)-Clausenamidone (+)-20:** Yield, 61%; mp 195-197°C,  $[\alpha]_{\text{D}}^{25} +345^\circ$  (*c* 0.29, CH<sub>3</sub>OH); {lit.<sup>2</sup> (+)-clausenamidone, mp 203-206°C,  $[\alpha]_{\text{D}}^{25} +333^\circ$  (*c* 0.01, CH<sub>3</sub>OH)}; IR (KBr)  $\nu$  3331, 1692 cm<sup>-1</sup>; <sup>1</sup>H NMR (300 MHz, CDCl<sub>3</sub>)  $\delta$  7.02-7.54 (m, 10H), 5.38 (d, *J* = 8.9 Hz, 1H), 4.90 (dd, *J* = 2.6, 9.8 Hz, 1H), 3.86 (t, *J* = 9.3 Hz, 1H), 3.30 (t, *J* = 3.7 Hz, 1H), 2.89 (s, 3H).

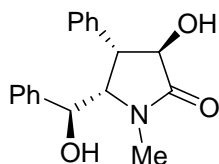

**(+)-Clausenamide (+)-1:** Yield, 90%; mp 176-178°C;  $[\alpha]_{\text{D}}^{25} +123^\circ$  (*c* 0.26, DMSO : H<sub>2</sub>O = 9:1 (v/v)); {lit.<sup>6</sup> (+)-clausenamide, mp 152-153°C,  $[\alpha]_{\text{D}}^{25} +123.19^\circ$  (*c* 0.46, DMSO : H<sub>2</sub>O = 9:1 (v/v))}; IR (KBr)  $\nu$  3408, 3207, 1688 cm<sup>-1</sup>; <sup>1</sup>H NMR (300 MHz, *d*<sub>6</sub>-DMSO)  $\delta$  7.03-7.26 (m, 8H), 6.63-6.66 (m, 2H), 5.42 (s, 1H), 5.36 (d, *J* = 4.9 Hz, 1H), 4.64 (s, 1H), 4.29 (dd, *J* = 2.2, 8.3 Hz, 1H), 3.83 (dd, *J* = 6.4, 10.9 Hz, 1H), 3.50 (dd, *J* = 8.6, 10.8 Hz, 1H), 3.01 (s, 3H).

### Synthesis of Cycloclausenamide (±)-5.



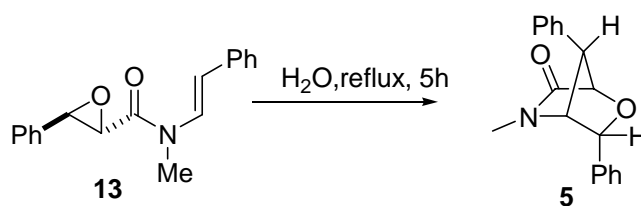

Our previous method for the reaction of racemic *N*-(*E*-styryl)-3-phenyloxirane-2-carboxamide (±)-**13** was adopted<sup>4</sup>. Refluxing a suspension of enamides (±)-**13** (5 mmol, 1.395 g) in pure water (150 mL) for 5 h under argon protection gave rise to a homogeneous solution. After addition of brine (50 mL), the mixture was extracted with ethyl acetate (3×50 mL). The organic layer was dried with anhydrous Na<sub>2</sub>SO<sub>4</sub>, filtrated and concentrated under vacuum. The chromatography using a silica gel (200-300 mesh) column eluting with a mixture of petroleum ether and ethyl acetate (1:1) gave cycloclausenamide (±)-**5** (55 mg, 4%) and **2+2'** (30:70, 1.351 g, 91%).

**Cycloclausenamide (±)-5**: mp 140-142°C (Lit.<sup>7</sup> mp 164-166°C); IR (KBr)  $\nu$  3435, 1672, 1639 cm<sup>-1</sup>; <sup>1</sup>H NMR (300 MHz, CDCl<sub>3</sub>, 300K)  $\delta$  7.08-7.47 (m, 10H), 5.00 (s, 1H), 4.81 (dd, *J* = 1.2, 2.3 Hz, 1H), 4.09 (s, 1H), 3.60 (s, 1H), 2.95 (s, 3H).

#### Synthesis of Cycloclausenamide analog (±)-16.

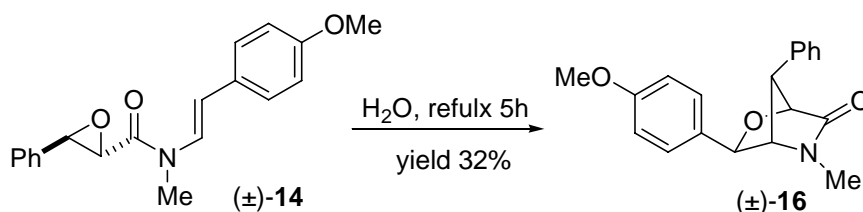

Our previous method for the reaction of racemic *N*-(*E*-styryl)-3-(4-methoxyphenyl)oxirane-2-carboxamide (±)-**14** was adopted<sup>4</sup>. Refluxing a suspension of enamides (±)-**14** (1 mmol, 309mg) in pure water (30 mL) for 5 h under argon protection gave rise to a homogeneous solution. After addition of brine (30 mL), the mixture was extracted with ethyl acetate (3×20 mL). The organic layer was dried with anhydrous Na<sub>2</sub>SO<sub>4</sub>, filtrated and concentrated under vacuum. The chromatography using a silica gel (200-300 mesh) column eluting with a mixture of petroleum ether and ethyl acetate (1:1) gave products (±)-**16** (99 mg, 32%) and **15+15'** (30:70, 222 mg, 68%).

Cycloclausenamide analog (±)-**16**: mp 158-160°C; IR (KBr)  $\nu$  1704 cm<sup>-1</sup>; <sup>1</sup>H NMR (300 MHz, CDCl<sub>3</sub>, 300K)  $\delta$  6.93-7.39 (m, 9H), 4.96 (s, 1H), 4.79 (s, 1H), 4.04 (s, 1H),

3.83 (s, 3H), 3.61 (s, 1H), 2.94 (s, 3H);  $^{13}\text{C}$ NMR (75 MHz,  $\text{CDCl}_3$ , 300K)  $\delta$  172.4, 159.3, 122.8, 131.1, 128.7, 127.9, 127.4, 126.8, 114.1, 80.3, 80.2, 70.3, 55.4, 50.6, 27.4; MS (ESI)  $[\text{M}+1]^+$  (100), 332  $[\text{M}+\text{Na}]^+$  (42). Anal. Calcd. for  $\text{C}_{19}\text{H}_{19}\text{NO}_3$ : C, 73.77; H, 6.19; N, 4.53. Found: C, 73.52; H, 6.17; N, 4.52.

### Synthesis of Lansamide-3 analog ( $\pm$ )-17.

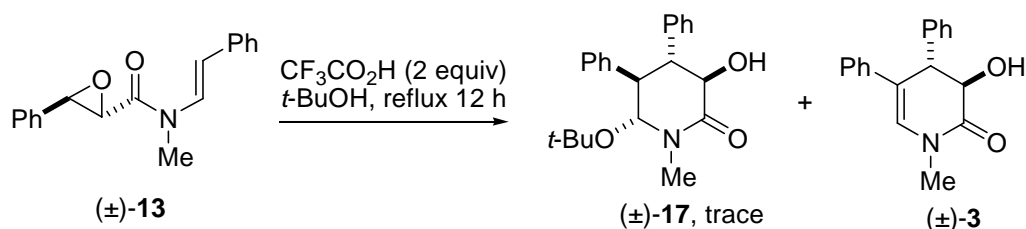

Our previous method for the reaction of racemic *N*-(*E*-styryl)-3-phenyloxirane-2-carboxamide ( $\pm$ )-**13** was adopted<sup>4</sup>. A mixture of enamide ( $\pm$ )-**13** (1 mmol, 279 mg) in dry  $\text{Bu}^t\text{OH}$  (30 mL) under argon protection was heated to reflux, and then *p*-TFA (2 mmol, 224 mg) was added. After refluxing for another 12 h, the mixture was cooled and a saturated aqueous solution of  $\text{NaHCO}_3$  (30 mL) was added. The resulting mixture was extracted with ethyl acetate (3 $\times$ 30 mL). The organic layer was dried with anhydrous  $\text{Na}_2\text{SO}_4$ , filtrated and concentrated under vacuum. Pure product ( $\pm$ )-**3** (234 mg, 84%) and Lansamide-4 analogs ( $\pm$ )-**17** was obtained after silica gel (200-300 mesh) column chromatography using a mixture of petroleum ether and ethyl acetate (2:1) as an eluant.

Lansamide-3 analogs ( $\pm$ )-**17**: mp 159-161  $^\circ\text{C}$ ; IR (KBr)  $\nu$  3324, 3227, 1684  $\text{cm}^{-1}$ ;  $^1\text{H}$  NMR (300 MHz,  $\text{CDCl}_3$ , 300K)  $\delta$  7.16-7.31 (m, 8H), 6.77-6.81 (m, 2H), 4.73 (d,  $J$  = 6.2 Hz, 1H), 4.13 (t,  $J$  = 4.4 Hz, 1H), 4.16 (d,  $J$  = 4.8 Hz, 1H), 3.70 (dd,  $J$  = 3.9, 6.2 Hz, 1H), 3.03 (t,  $J$  = 3.9 Hz, 1H), 3.98 (s, 3H), 1.11 (s, 9H);  $^{13}\text{C}$ NMR (75 MHz,  $\text{CDCl}_3$ , 300K)  $\delta$  175.0, 141.8, 141.5, 128.7, 128.2, 127.8, 127.7, 126.7, 75.6, 71.6, 49.2, 31.8, 28.8; MS (ESI) 354  $[\text{M}+1]^+$ . Anal. Calcd. for  $\text{C}_{22}\text{H}_{27}\text{NO}_3$ : C, 74.76; H, 7.70; N, 3.96. Found: C, 74.50; H, 7.53; N, 4.06.

### 3, References

- 1, Asymmetric Epoxidation see: (a) Katsuki, T., Sharpless, K. B., *J. Am. Chem. Soc.* **1980**, *102*, 5974-5978. Gao, Y., Hanson, R. M., Klunder, J. M., Ko, S. Y., Masamune, H., Sharpless, K. B., *J. Am. Chem. Soc.* **1987**, *109*, 5765. (b) Jean, N. D., Andrew, E. G., Serra, A. A., Luche, M. J., *J. Org. Chem.* **1986**, *51*, 46-50.

- 2, oxidation and esterification see: Huang, D. F., Huang, L. *Tetrahedron*, 1990, 46, 3135-3142.
- 3, Yang, L.; Deng, G.; Wang, D.-X.; Huang, Z.-T.; Zhu, J.; Wang, M.-X. *Org. Lett.* **2007**, 9, 1387.
- 4, Yang, L.; Zheng, Q.-Y.; Wang, D.-X.; Huang, Z.-T.; Wang, M.-X. *Org. Lett.* **2008**, 10, 2461.
- 5, Wang, J.-Q.; Tian, W.-S. *J. Chem. Soc., Perkin Trans 1*, **1996**, 209-211.
- 6, Hartwig, W.; Born, L. *J. Org. Chem.* **1987**, 52, 4352.
7. Yang, M.-H.; Chen, Y.-Y.; Huang, L. *Phytochemistry* **1988**, 27, 445.

**4, HPLC analysis (+)22, (+)23, (+)7, (-)4, (-)3, (+)19, (-)20, (-)22, (-)23, (-)7, (+)4, (+)3, (-)19, (+)20**

A Shimadzu LC-10AVP HPLC system was used to determine enantiomeric excess values of all products.

**Chiral HPLC Analysis**

| entry                                                                                                                                                                                                                                                                     | Structure                                                                           | retention time/min | column |
|---------------------------------------------------------------------------------------------------------------------------------------------------------------------------------------------------------------------------------------------------------------------------|-------------------------------------------------------------------------------------|--------------------|--------|
| 1                                                                                                                                                                                                                                                                         | 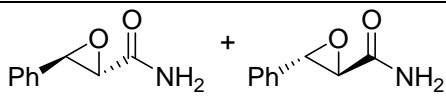   | 22.3/24.7          | OD     |
| 2                                                                                                                                                                                                                                                                         |    | 12.7/15.7          | OD     |
| 3                                                                                                                                                                                                                                                                         |    | 32.6/34.7          | ADH    |
| 4                                                                                                                                                                                                                                                                         |   | 48.5/34.2          | AD     |
| 5                                                                                                                                                                                                                                                                         |  | 32.2/21.3          | AD     |
| 6                                                                                                                                                                                                                                                                         |  | 86.5/56.8          | AD     |
| 7                                                                                                                                                                                                                                                                         |  | 57.8/88.4          | AD     |
| Chiral column were purchased form DAICEL Chemical Industries, LTD. Chiralcel ADH employed hexane : isopropanol = 9:1 as mobile phase, flow rate 0.5ml/min, 25°C; while Chiralcel AD or OD employed hexane : isopropanol = 9:1 as mobile phase, flow rate 0.8ml/min, 25°C. |                                                                                     |                    |        |

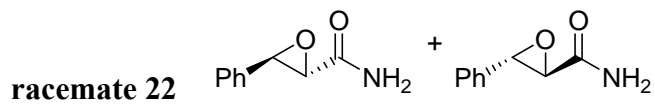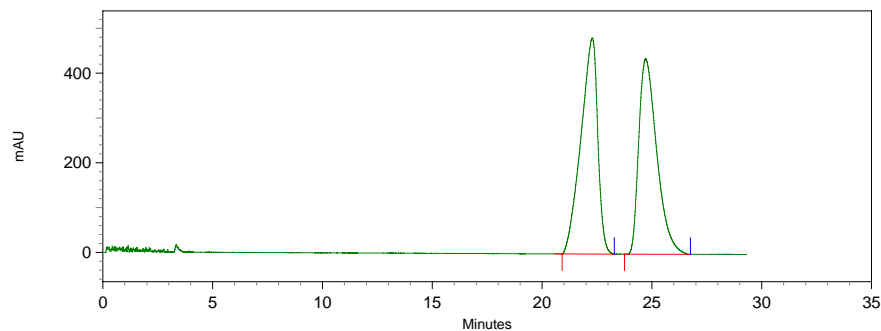

| Pk #   | Retention Time | Area     | Area Percent |
|--------|----------------|----------|--------------|
| 1      | 22.278         | 25716700 | 50.86        |
| 2      | 24.712         | 24843704 | 49.14        |
| Totals |                | 50560403 | 100.00       |

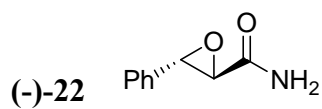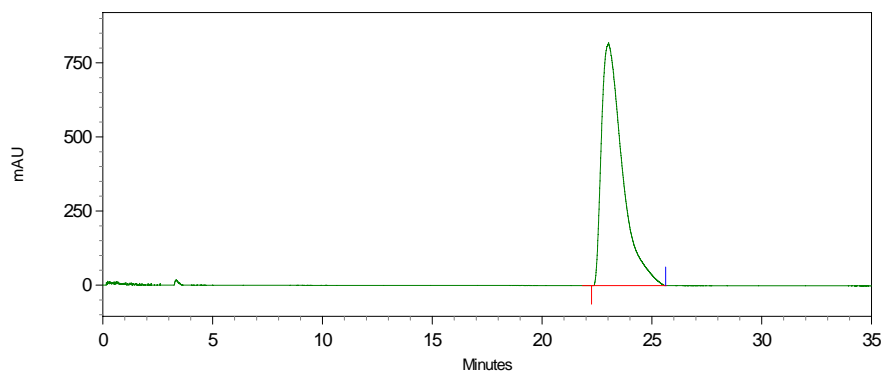

| Pk #   | Retention Time | Area     | Area Percent |
|--------|----------------|----------|--------------|
| 1      | 23.023         | 53780849 | 100.00       |
| Totals |                | 53780849 | 100.00       |

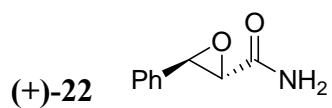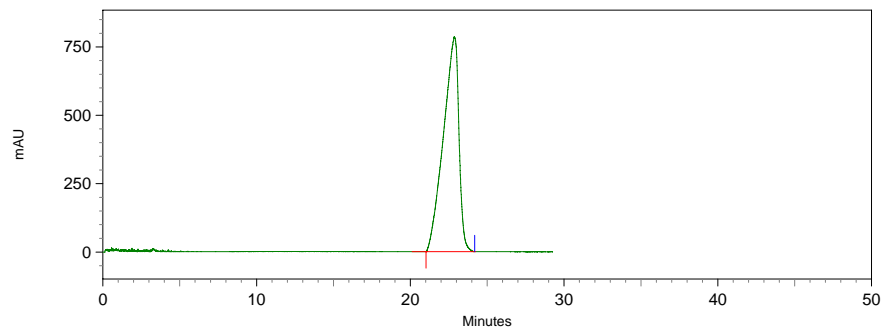

| Pk #   | Retention Time | Area     | Area Percent |
|--------|----------------|----------|--------------|
| 1      | 22.849         | 55135848 | 100.00       |
| Totals |                | 55135848 | 100.00       |

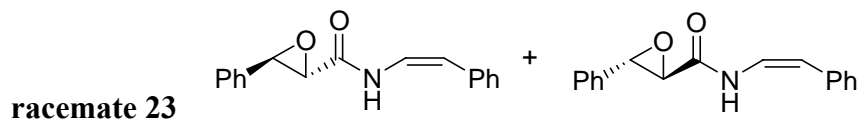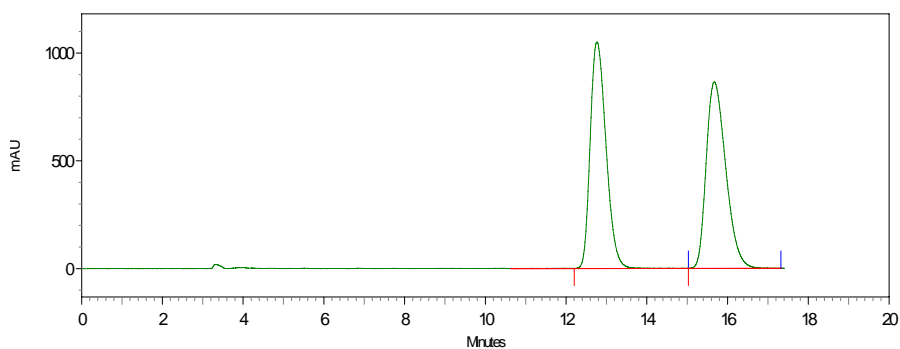

| Pk #   | Retention Time | Area     | Area Percent |
|--------|----------------|----------|--------------|
| 1      | 12.752         | 28582889 | 49.55        |
| 2      | 15.668         | 29102849 | 50.45        |
| Totals |                | 57685737 | 100.00       |

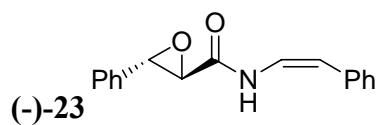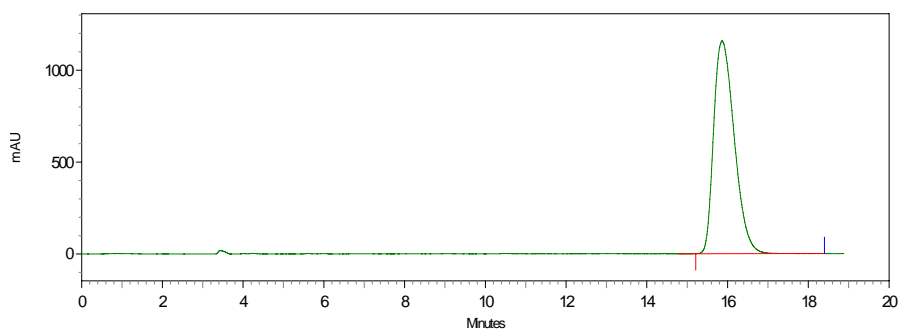

| Pk #   | Retention Time | Area     | Area Percent |
|--------|----------------|----------|--------------|
| 1      | 15.864         | 41129023 | 100.00       |
| Totals |                | 41129023 | 100.00       |

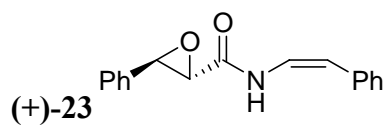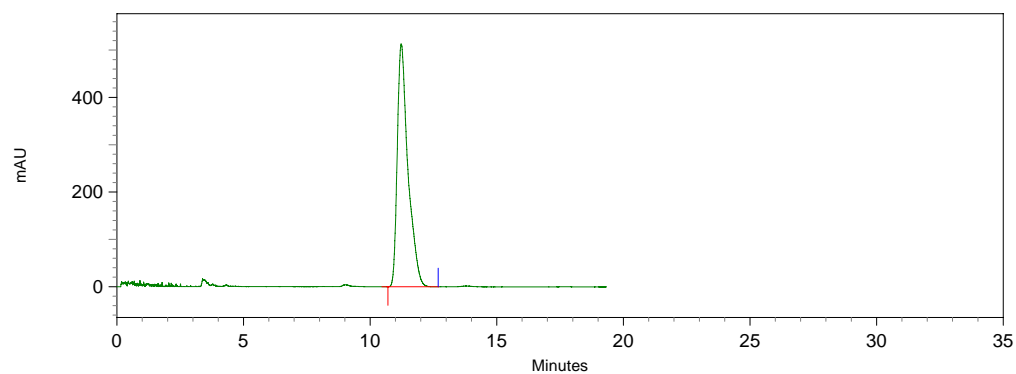

| Pk #   | Retention Time | Area     | Area Percent |
|--------|----------------|----------|--------------|
| 1      | 11.220         | 15079913 | 100.00       |
| Totals |                | 15079913 | 100.00       |

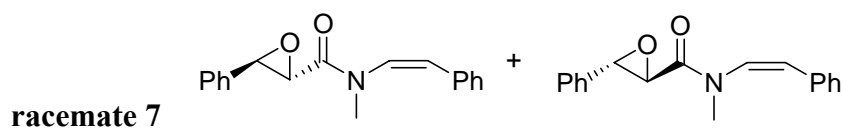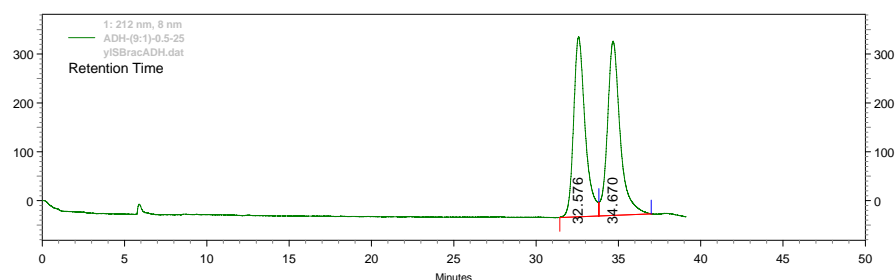

| Pk #          | Retention Time | Area            | Area Percent  |
|---------------|----------------|-----------------|---------------|
| 1             | 32.576         | 18068388        | 48.55         |
| 2             | 34.670         | 19145495        | 51.45         |
| <b>Totals</b> |                | <b>37213883</b> | <b>100.00</b> |

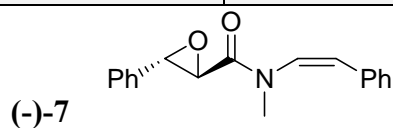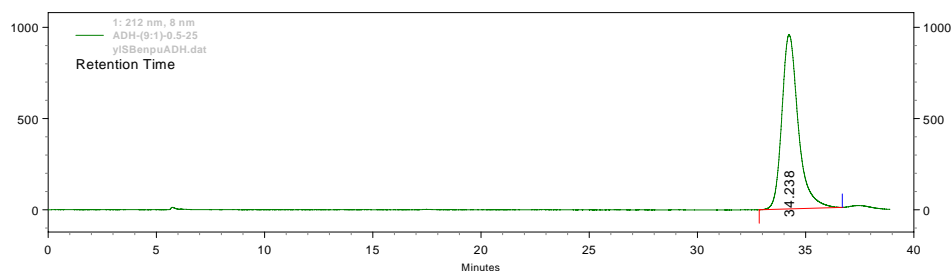

| Pk #          | Retention Time | Area            | Area Percent  |
|---------------|----------------|-----------------|---------------|
| 1             | 34.238         | 50273637        | 100.00        |
| <b>Totals</b> |                | <b>50273637</b> | <b>100.00</b> |

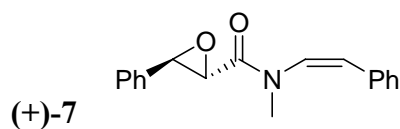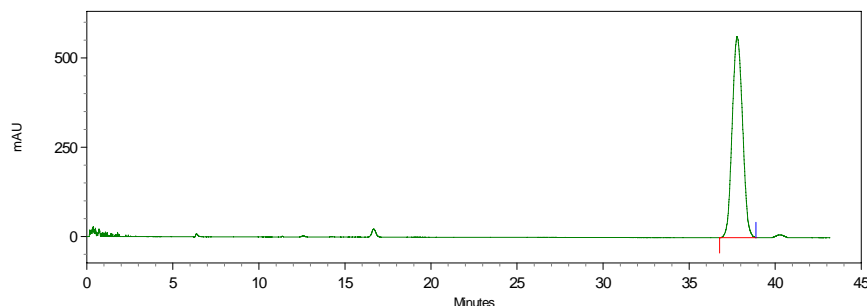

| Pk #          | Retention Time | Area            | Area Percent  |
|---------------|----------------|-----------------|---------------|
| 1             | 37.782         | 23525709        | 100.00        |
| <b>Totals</b> |                | <b>23525709</b> | <b>100.00</b> |

racemate 4

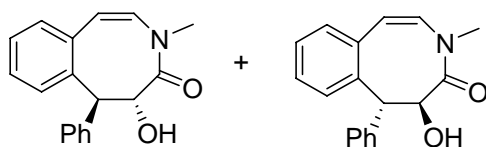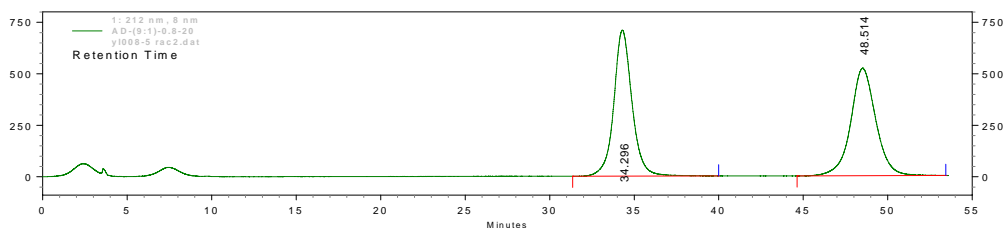

| Pk #          | Retention Time | Area             | Area Percent  |
|---------------|----------------|------------------|---------------|
| 1             | 34.296         | 53248406         | 49.68         |
| 2             | 48.514         | 53941077         | 50.32         |
| <b>Totals</b> |                | <b>107189483</b> | <b>100.00</b> |

(+)-4

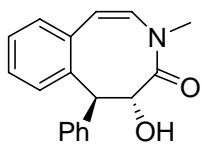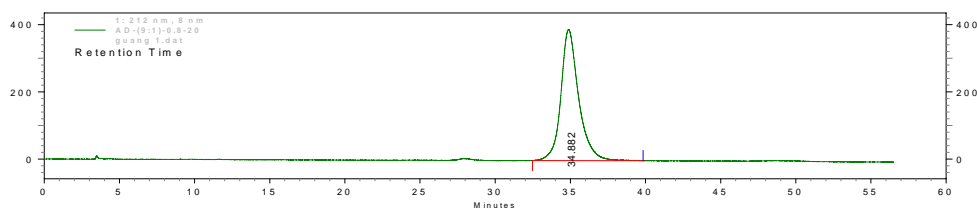

| Pk #          | Retention Time | Area            | Area Percent  |
|---------------|----------------|-----------------|---------------|
| 1             | 34.882         | 32069538        | 100.00        |
| <b>Totals</b> |                | <b>32069538</b> | <b>100.00</b> |

(-)-4

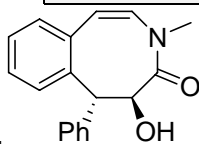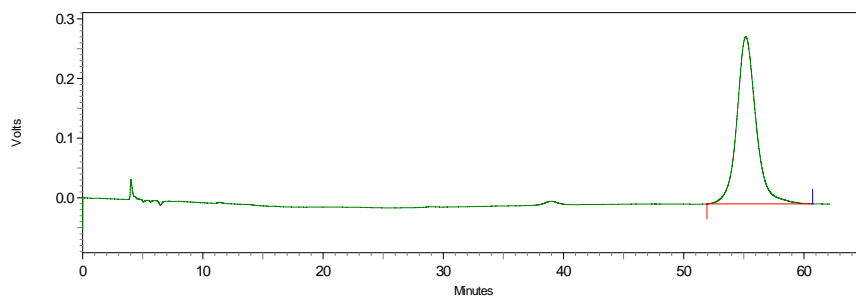

| Pk #          | Retention Time | Area            | Area Percent  |
|---------------|----------------|-----------------|---------------|
| 1             | 55.157         | 31056971        | 100.00        |
| <b>Totals</b> |                | <b>31056971</b> | <b>100.00</b> |



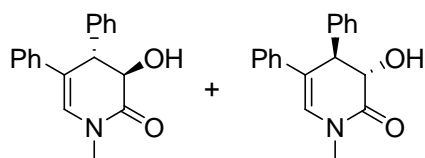

**racemate 3**

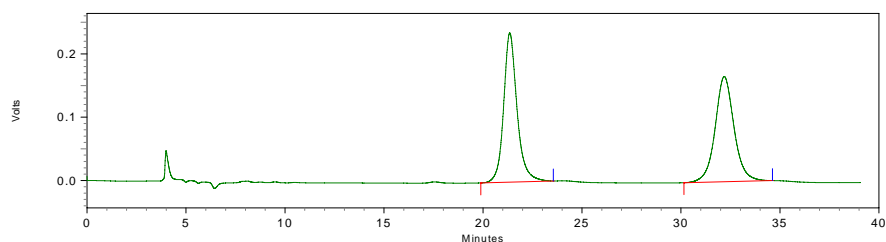

| Pk #   | Retention Time | Area     | Area Percent |
|--------|----------------|----------|--------------|
| 1      | 21.347         | 11107667 | 50.12        |
| 2      | 32.181         | 11053515 | 49.88        |
| Totals |                | 22161182 | 100.00       |

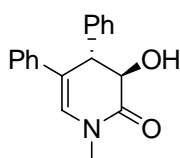

**(+)-3**

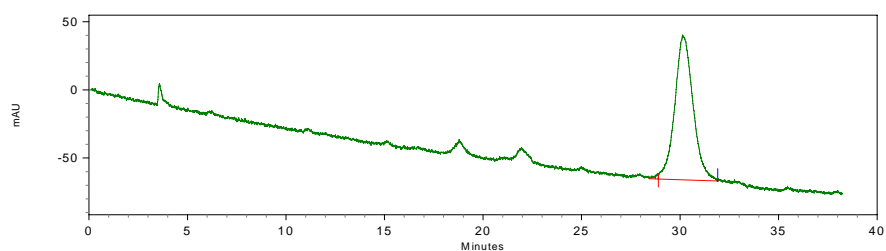

| Pk #   | Retention Time | Area    | Area Percent |
|--------|----------------|---------|--------------|
| 1      | 30.173         | 6809067 | 100.00       |
| Totals |                | 6809067 | 100.00       |

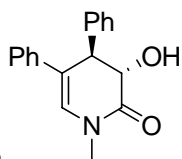

**(-)-3**

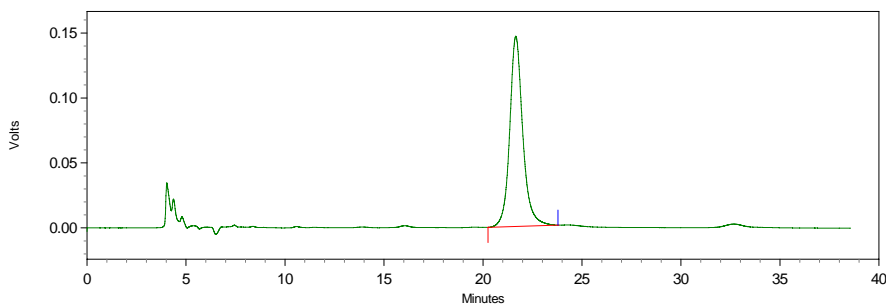

| Pk #   | Retention Time | Area    | Area Percent |
|--------|----------------|---------|--------------|
| 1      | 21.652         | 6713348 | 100.00       |
| Totals |                | 6713348 | 100.00       |

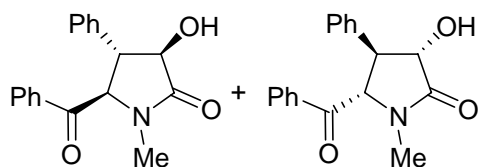

**racemate 19**

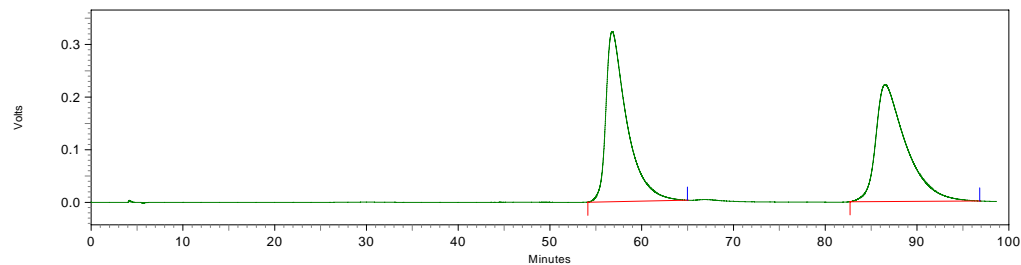

| Pk #   | Retention Time | Area      | Area Percent |
|--------|----------------|-----------|--------------|
| 1      | 56.770         | 51421662  | 50.25        |
| 2      | 86.520         | 50912080  | 49.75        |
| Totals |                | 102333742 | 100.00       |

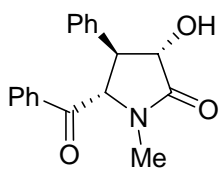

**(+)-19**

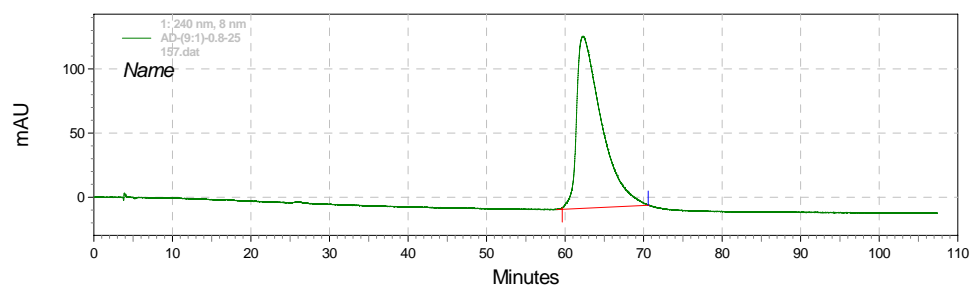

| Pk #   | Retention Time | Area     | Area Percent |
|--------|----------------|----------|--------------|
| 1      | 62.244         | 36180795 | 100.00       |
| Totals |                | 36180795 | 100.00       |

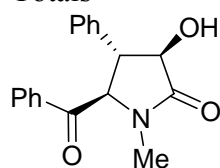

**(-)-19**

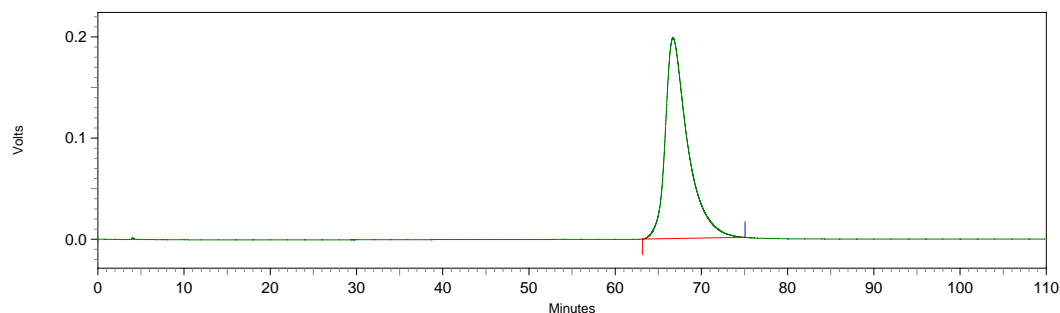

| Retention Time | Area     | Area Percent | Name   |
|----------------|----------|--------------|--------|
| 66.699         | 35908487 | 100.00       |        |
| Totals         |          | 35908487     | 100.00 |

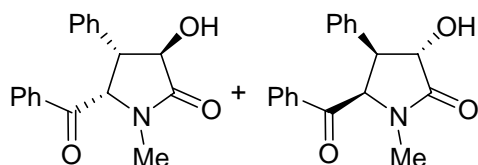

**racemate 20**

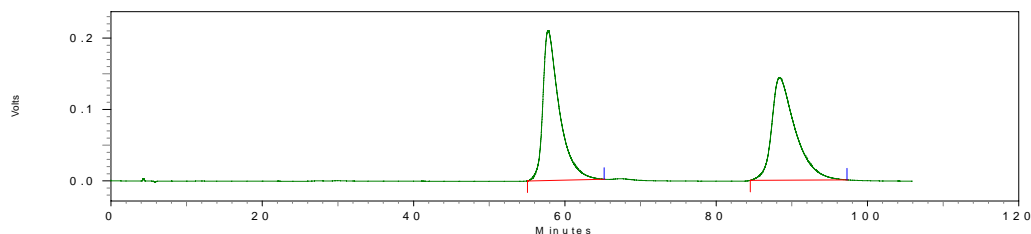

| Retention Time | Area     | Area Percent | Pk # |
|----------------|----------|--------------|------|
| 57.781         | 31890818 | 50.55        | 1    |
| 88.379         | 31197464 | 49.45        | 2    |
| Totals         | 63088282 | 100.00       |      |

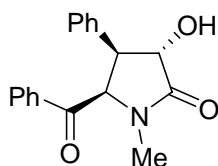

**(-)-20**

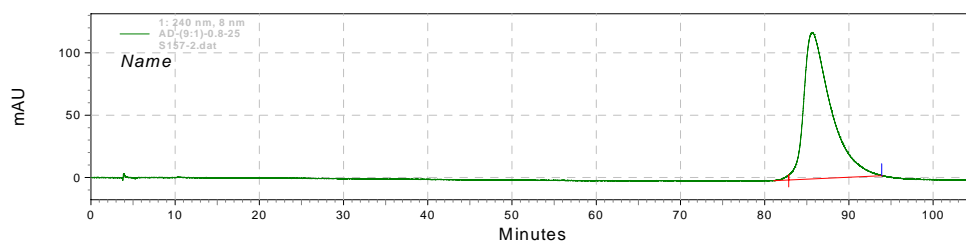

| Pk #   | Retention Time | Area     | Area Percent |
|--------|----------------|----------|--------------|
| 1      | 85.584         | 44389496 | 100.00       |
| Totals |                | 44389496 | 100.00       |

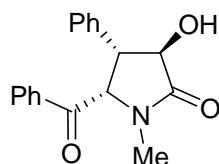

**(+)-20**

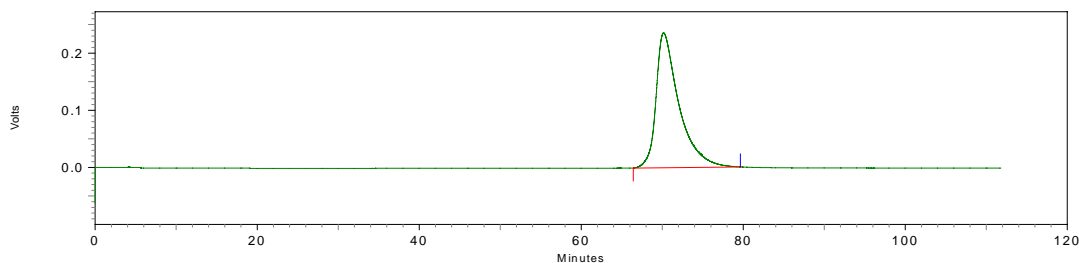

| Pk #   | Retention Time | Area     | Area Percent |
|--------|----------------|----------|--------------|
| 1      | 70.170         | 46375031 | 100.00       |
| Totals |                | 46375031 | 100.00       |

## 5, Copies of $^1\text{H}$ and $^{13}\text{C}$ NMR spectra of compounds

cisphcisph

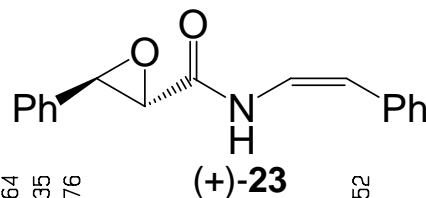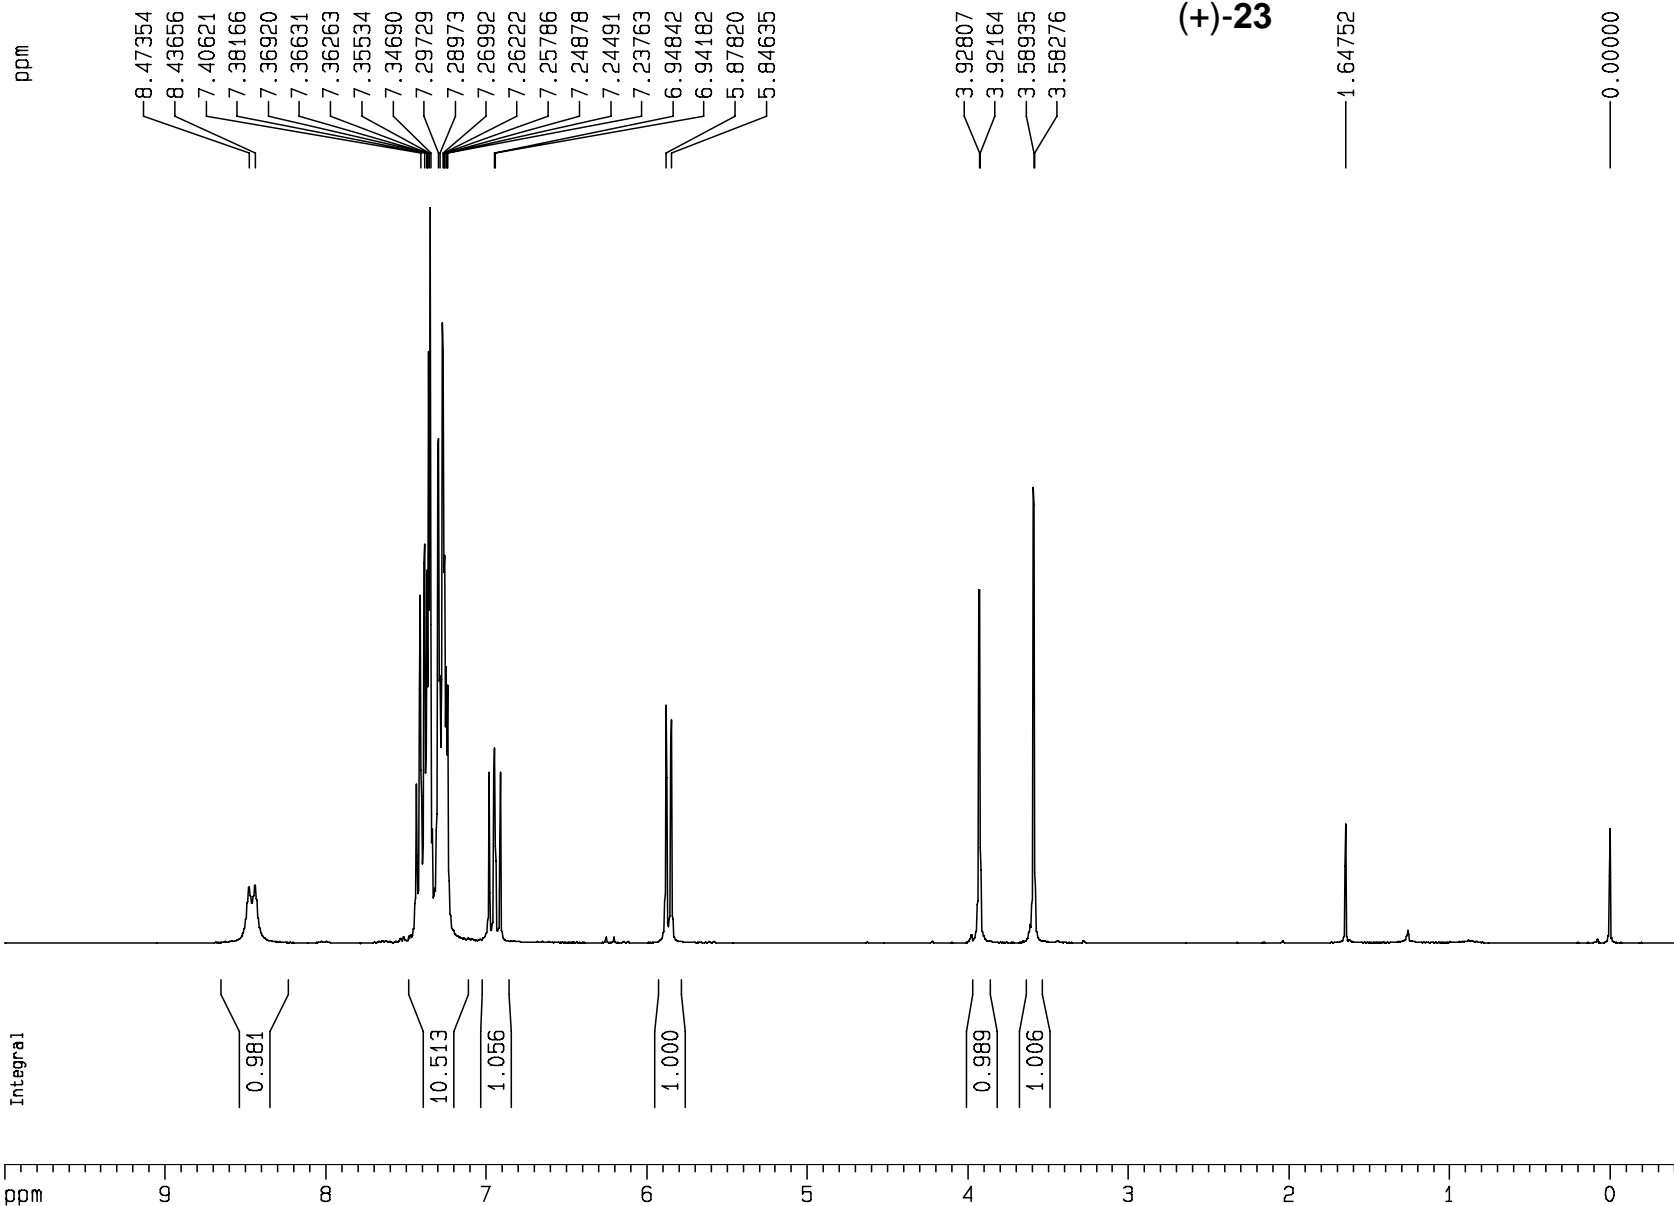

Current Data Parameters  
NAME y1004  
EXPNO 1  
PROCNO 1

F2 - Acquisition Parameters  
Date\_ 20051120  
Time 16.23  
INSTRUM av300  
PROBHD 5 mm DUL 13C-1  
PULPROG zg30  
TD 65536  
SOLVENT CDCl3  
NS 16  
DS 2  
SWH 6172.839 Hz  
FIDRES 0.094190 Hz  
AQ 5.3084660 sec  
RG 161.3  
DW 81.000 usec  
DE 6.00 usec  
TE 295.8 K  
D1 2.00000000 sec

==== CHANNEL f1 =====  
NUC1 1H  
P1 9.30 usec  
PL1 -1.00 dB  
SF01 300.1318534 MHz

F2 - Processing parameters  
SI 32768  
SF 300.1300096 MHz  
WDW EM  
SSB 0  
LB 0.30 Hz  
GB 0  
PC 1.00

1D NMR plot parameters  
CX 22.00 cm  
CY 10.00 cm  
F1P 10.000 ppm  
F1 3001.30 Hz  
F2P -0.500 ppm  
F2 -150.06 Hz  
PPMCM 0.47727 ppm/cm  
HZCM 143.24385 Hz/cm

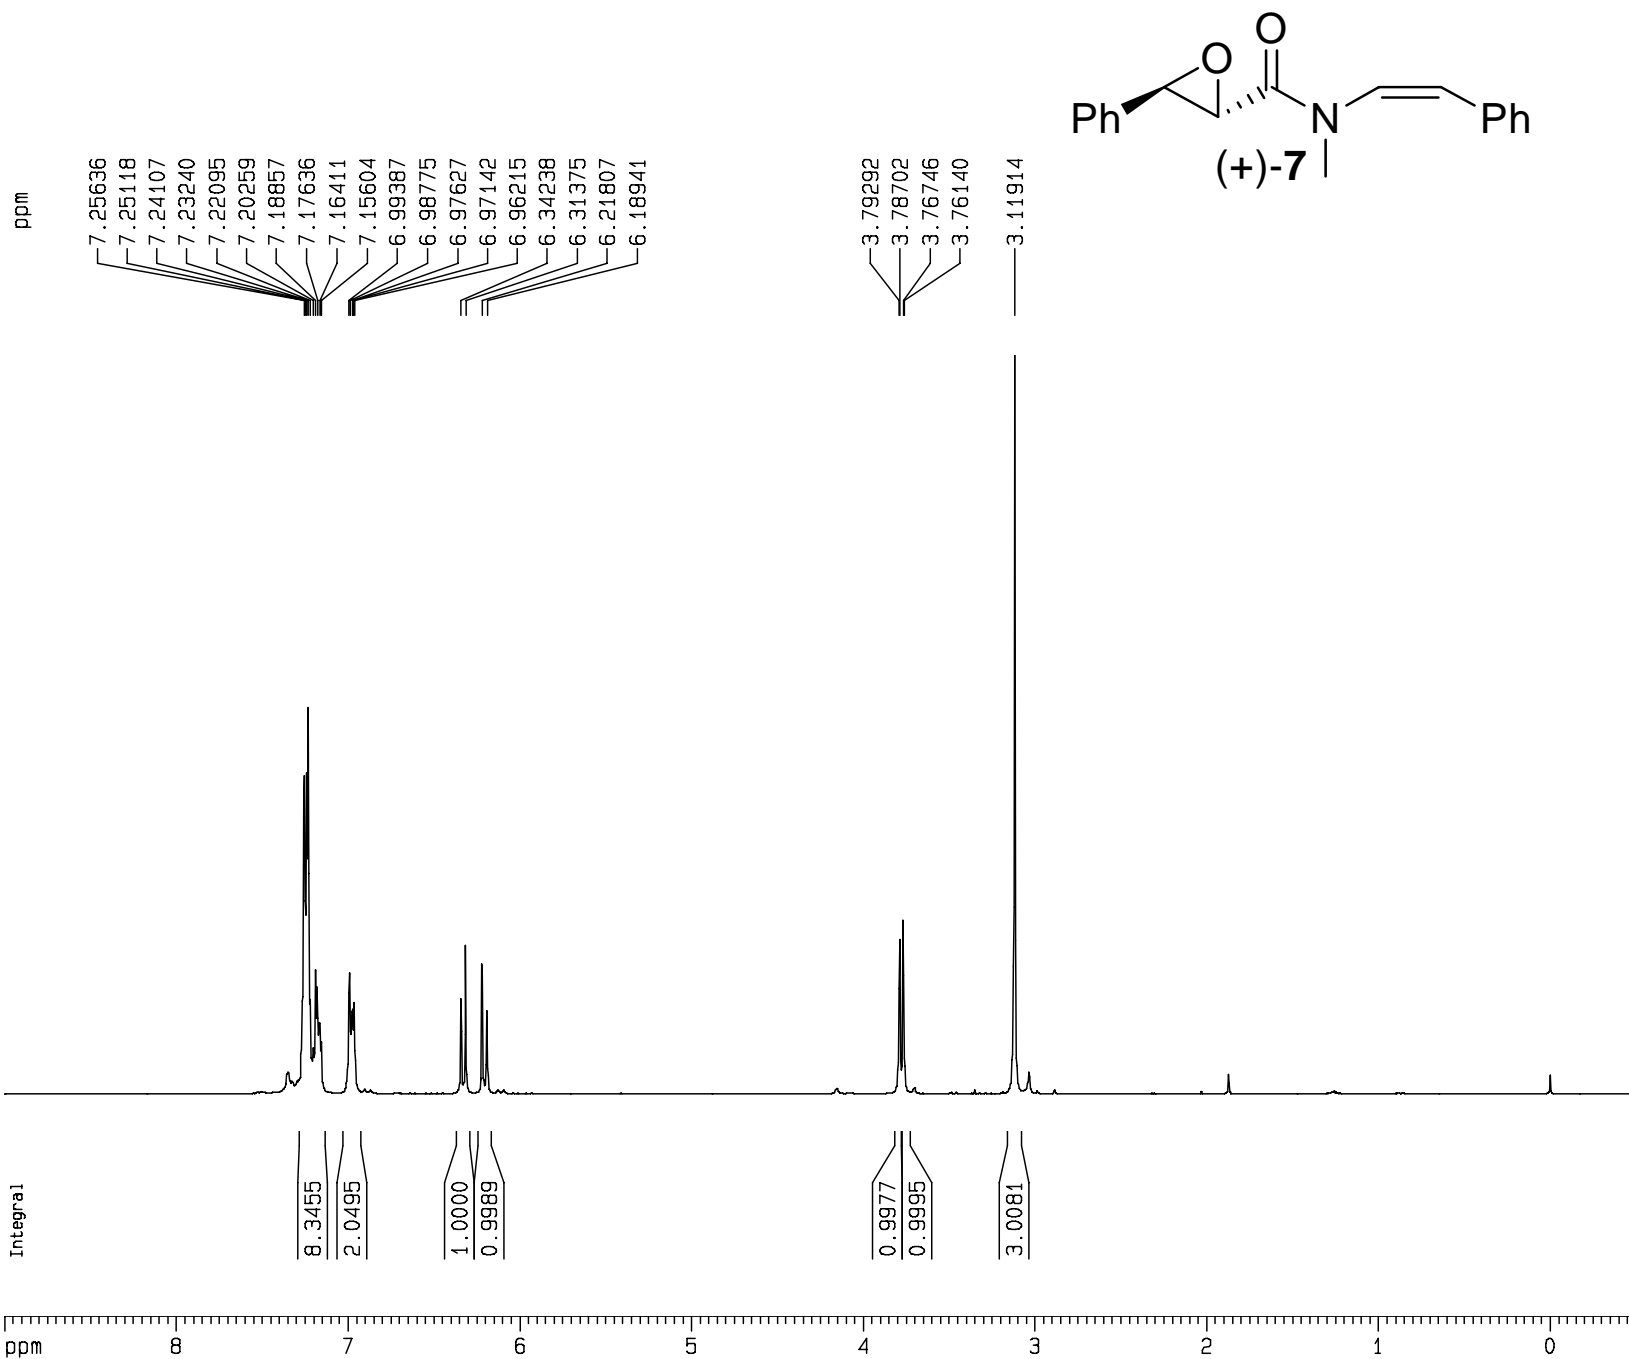

Current Data Parameters

NAME y1SSB  
EXPNO 10  
PROCNO 1

F2 - Acquisition Parameters

Date\_ 20070425  
Time 18.03  
INSTRUM av300  
PROBHD 5 mm DUL 13C-1  
PULPROG zg30  
TD 65536  
SOLVENT CDC13  
VS 16  
DS 0  
SWH 8992.806 Hz  
FIDRES 0.137219 Hz  
AQ 3.6438515 sec  
RG 90.5  
JW 55.600 usec  
DE 6.00 usec  
TE 300.5 K  
D1 5.00000000 sec

===== CHANNEL f1 =====

NUC1 1H  
P1 9.30 usec  
PL1 -1.00 dB  
SFO1 300.1318534 MHz

F2 - Processing parameters

SI 32768  
SF 300.1300070 MHz  
WDW EM  
SSB 0  
LB 0.35 Hz  
GB 0  
PC 1.00

1D NMR plot parameters

CX 22.00 cm  
CY 10.00 cm  
F1P 9.000 ppm  
F1 2701.17 Hz  
F2P -0.500 ppm  
F2 -150.07 Hz  
PPMCM 0.43182 ppm/cm  
HZCM 129.60159 Hz/cm

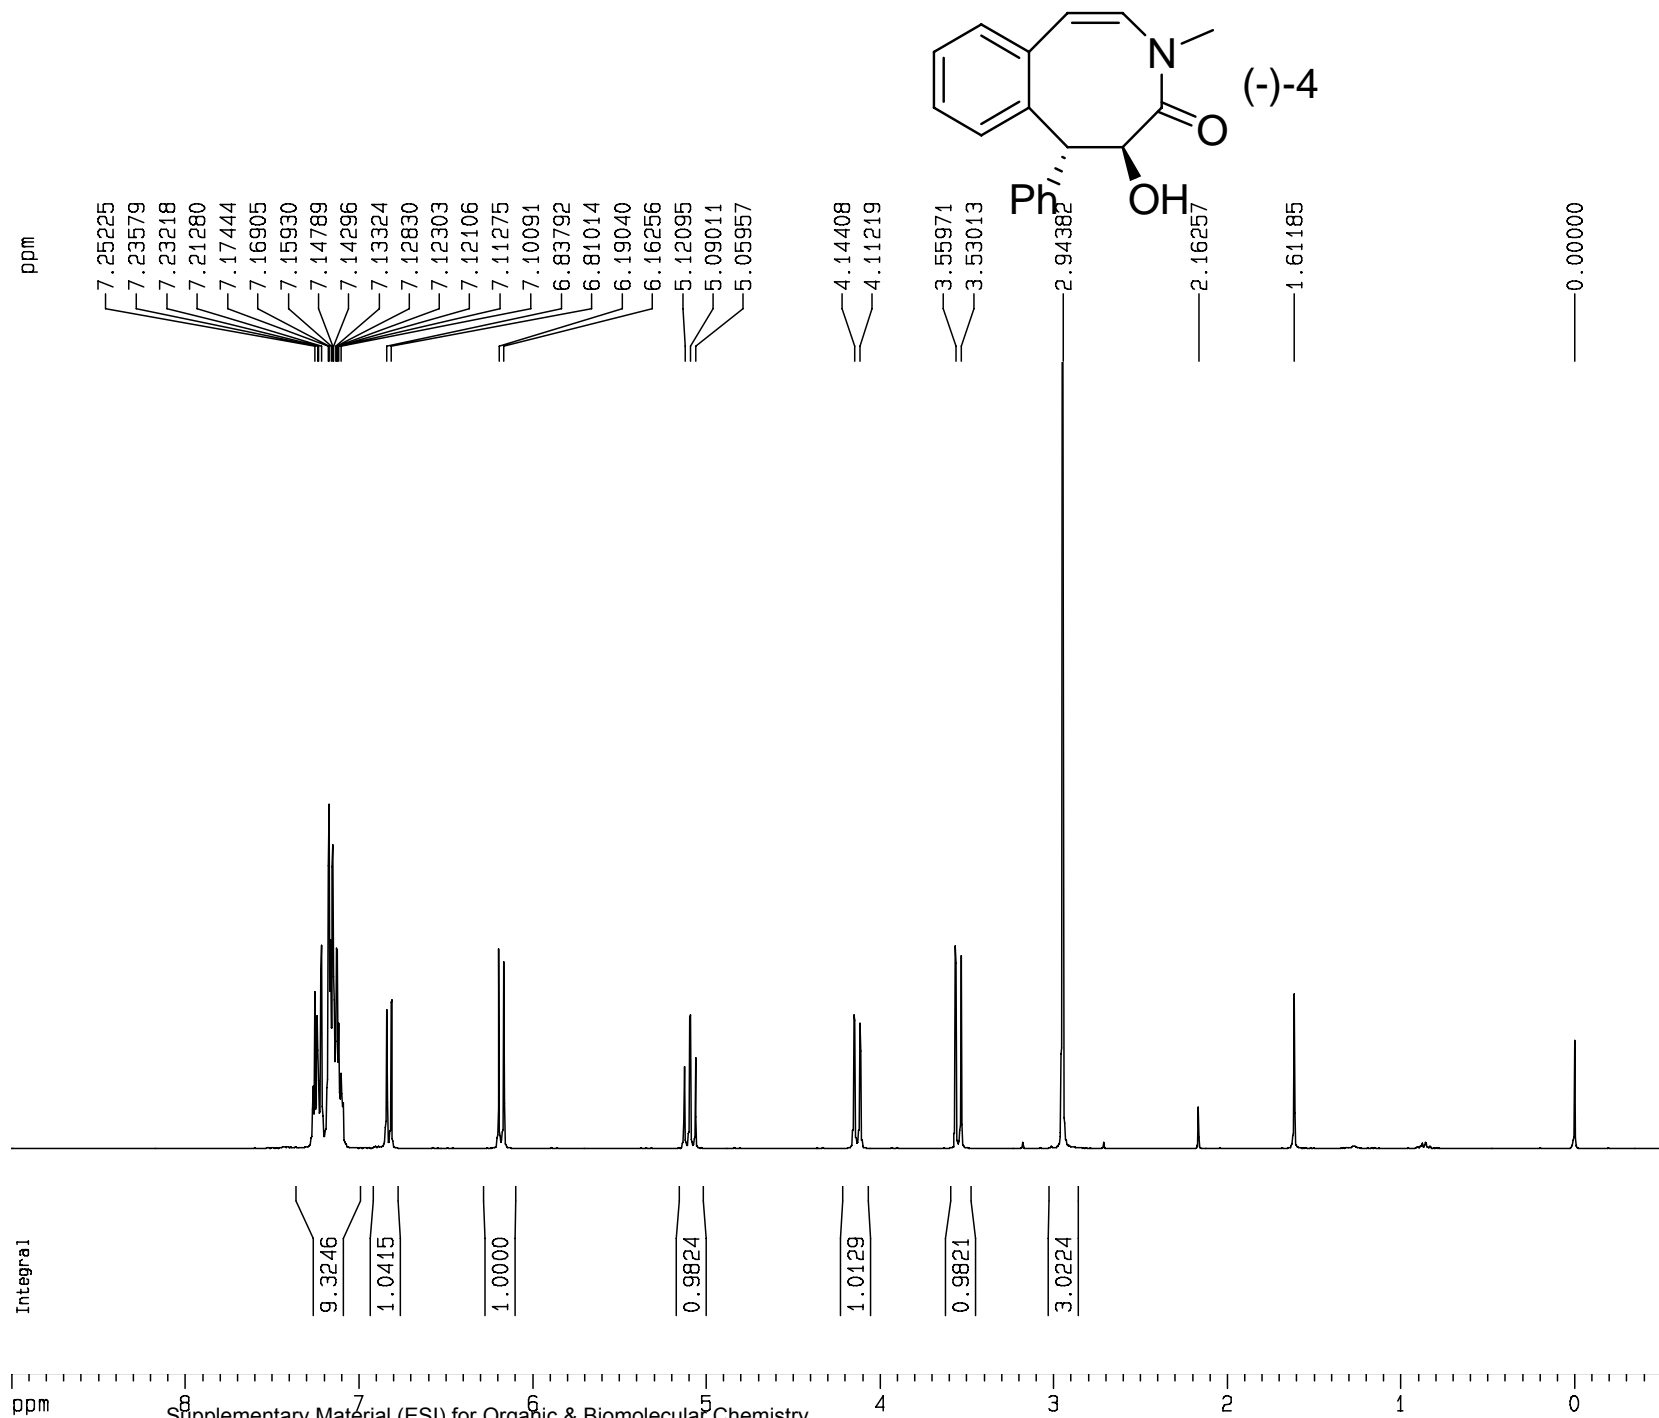

Current Data Parameters

NAME y15008-5  
 EXPNO 30  
 PROCNO 1

F2 - Acquisition Parameters

Date\_ 20080606  
 Time 11.14  
 INSTRUM spect  
 PROBHD 5 mm DUL 13C-1  
 PULPROG zg30  
 TD 65536  
 SOLVENT CDC13  
 NS 16  
 DS 0  
 SWH 8992.806 Hz  
 FIDRES 0.137219 Hz  
 AQ 3.6438515 sec  
 RG 161.3  
 DW 55.600 usec  
 DE 6.00 usec  
 TE 673.2 K  
 D1 1.00000000 sec  
 MCREST 0.00000000 sec  
 MCWRK 0.01500000 sec

==== CHANNEL f1 =====

NUC1 1H  
 P1 7.00 usec  
 PL1 -1.00 dB  
 SFO1 300.1324010 MHz

F2 - Processing parameters

SI 32768  
 SF 300.1300084 MHz  
 WDW EM  
 SSB 0  
 LB 0.30 Hz  
 GB 0  
 PC 1.00

1D NMR plot parameters

CX 22.00 cm  
 CY 15.00 cm  
 F1P 9.000 ppm  
 F1 2701.17 Hz  
 F2P -0.500 ppm  
 F2 -150.07 Hz  
 PPMCM 0.43182 ppm/cm  
 HZCM 129.60159 Hz/cm

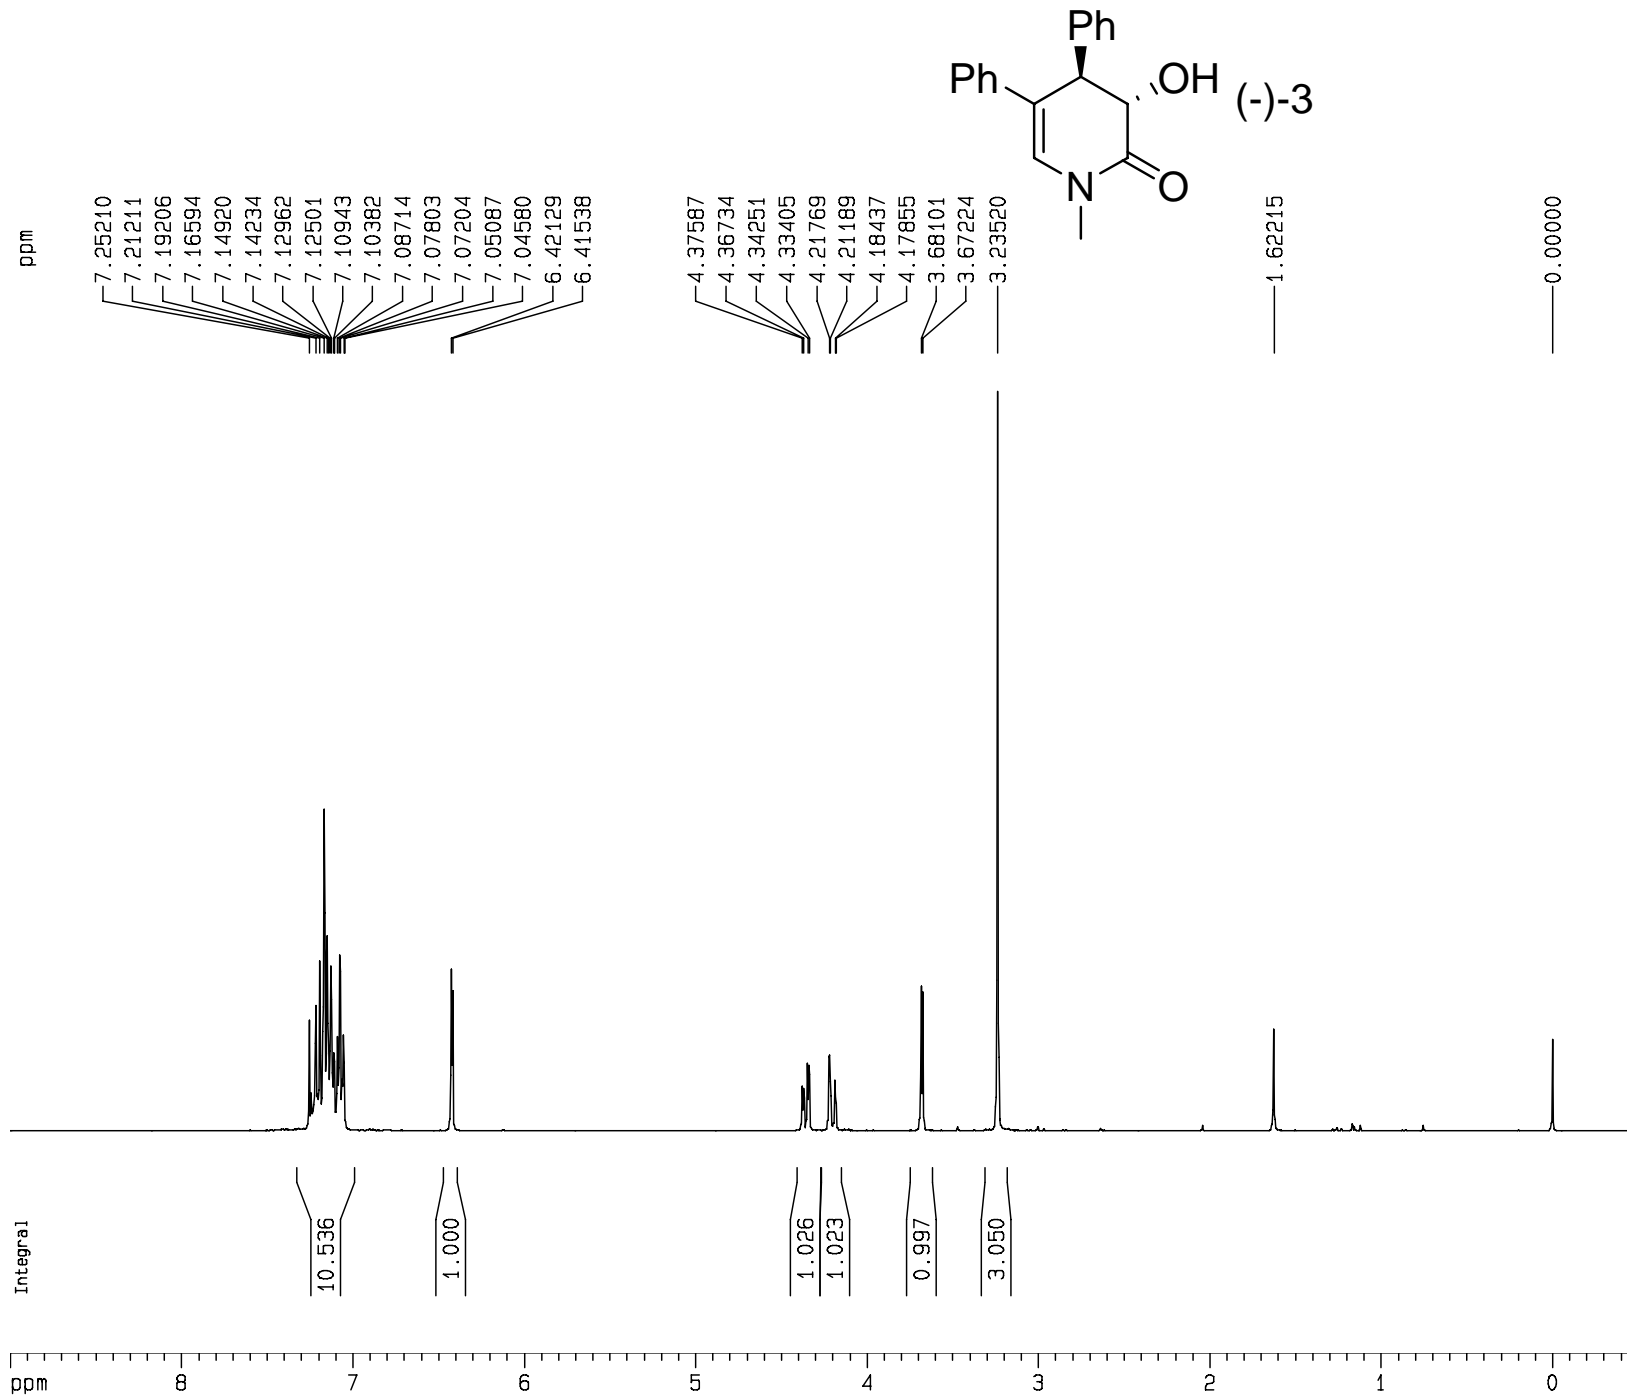

Current Data Parameters

NAME y1S055-1  
EXPNO 40  
PROCNO 1

F2 - Acquisition Parameters

Date\_ 20080606  
Time 11.19  
INSTRUM spect  
PROBHD 5 mm DUL 13C-1  
PULPROG zg30  
TD 65536  
SOLVENT CDCl3  
NS 16  
DS 0  
SWH 8992.806 Hz  
FIDRES 0.137219 Hz  
AQ 3.6438515 sec  
RG 181  
DW 55.600 usec  
DE 6.00 usec  
TE 673.2 K  
D1 1.00000000 sec  
MCREST 0.00000000 sec  
MCWRK 0.01500000 sec

===== CHANNEL f1 =====

NUC1 1H  
P1 7.00 usec  
PL1 -1.00 dB  
SFO1 300.1324010 MHz

F2 - Processing parameters

SI 32768  
SF 300.1300084 MHz  
WDW EM  
SSB 0  
LB 0.30 Hz  
GB 0  
PC 1.00

1D NMR plot parameters

CX 22.00 cm  
CY 10.00 cm  
F1P 9.000 ppm  
F1 2701.17 Hz  
F2P -0.500 ppm  
F2 -150.07 Hz  
PPMCM 0.43182 ppm/cm  
HZCM 129.60159 Hz/cm

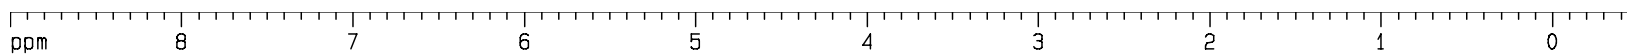

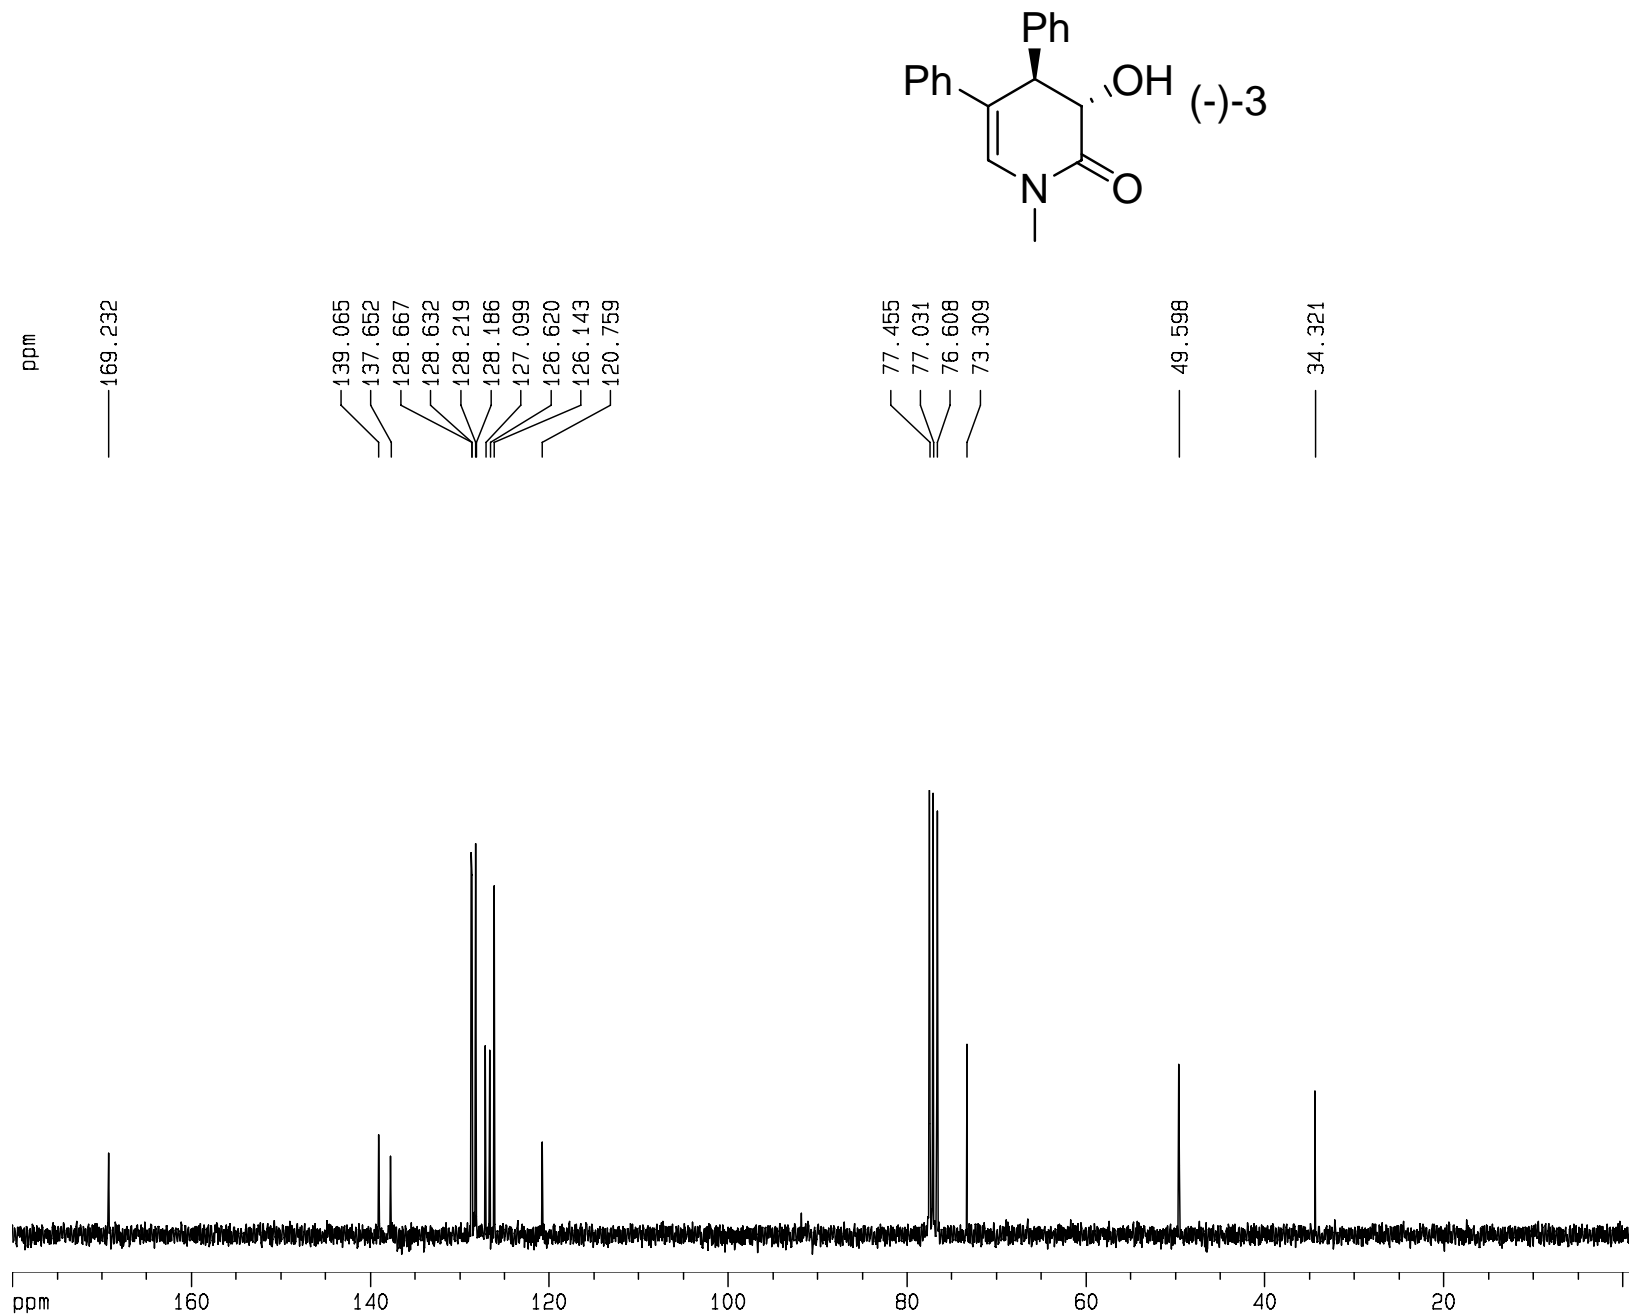

Current Data Parameters  
 NAME y15055-1  
 EXPNO 41  
 PROCNO 1

F2 - Acquisition Parameters  
 Date\_ 20080606  
 Time 11.22  
 INSTRUM spect  
 PROBHD 5 mm DUL 13C-1  
 PULPROG zgpg30  
 TD 65536  
 SOLVENT CDC13  
 NS 130  
 DS 4  
 SWH 17985.611 Hz  
 FIDRES 0.274439 Hz  
 AQ 1.8219508 sec  
 RG 1824.6  
 DW 27.800 usec  
 DE 6.00 usec  
 TE 673.2 K  
 D1 2.0000000 sec  
 d11 0.0300000 sec  
 DELTA 1.89999998 sec  
 MCREST 0.0000000 sec  
 MCWAK 0.0150000 sec

===== CHANNEL f1 =====  
 NUC1 13C  
 P1 12.50 usec  
 PL1 2.00 dB  
 SFO1 75.4752953 MHz

===== CHANNEL f2 =====  
 CPDPRG2 waltz16  
 NUC2 1H  
 PCPD2 80.00 usec  
 PL2 -1.00 dB  
 PL12 20.16 dB  
 PL13 16.98 dB  
 SFO2 300.1312005 MHz

F2 - Processing parameters  
 SI 32768  
 SF 75.4677490 MHz  
 WDW EM  
 SSB 0  
 LB 1.00 Hz  
 GB 0  
 PC 1.40

1D NMR plot parameters  
 CX 22.00 cm  
 CY 6.00 cm  
 F1P 180.000 ppm  
 F1 13584.20 Hz  
 F2P -2.000 ppm  
 F2 -150.94 Hz  
 PPMCM 8.27273 ppm/cm  
 HZCM 624.32410 Hz/cm



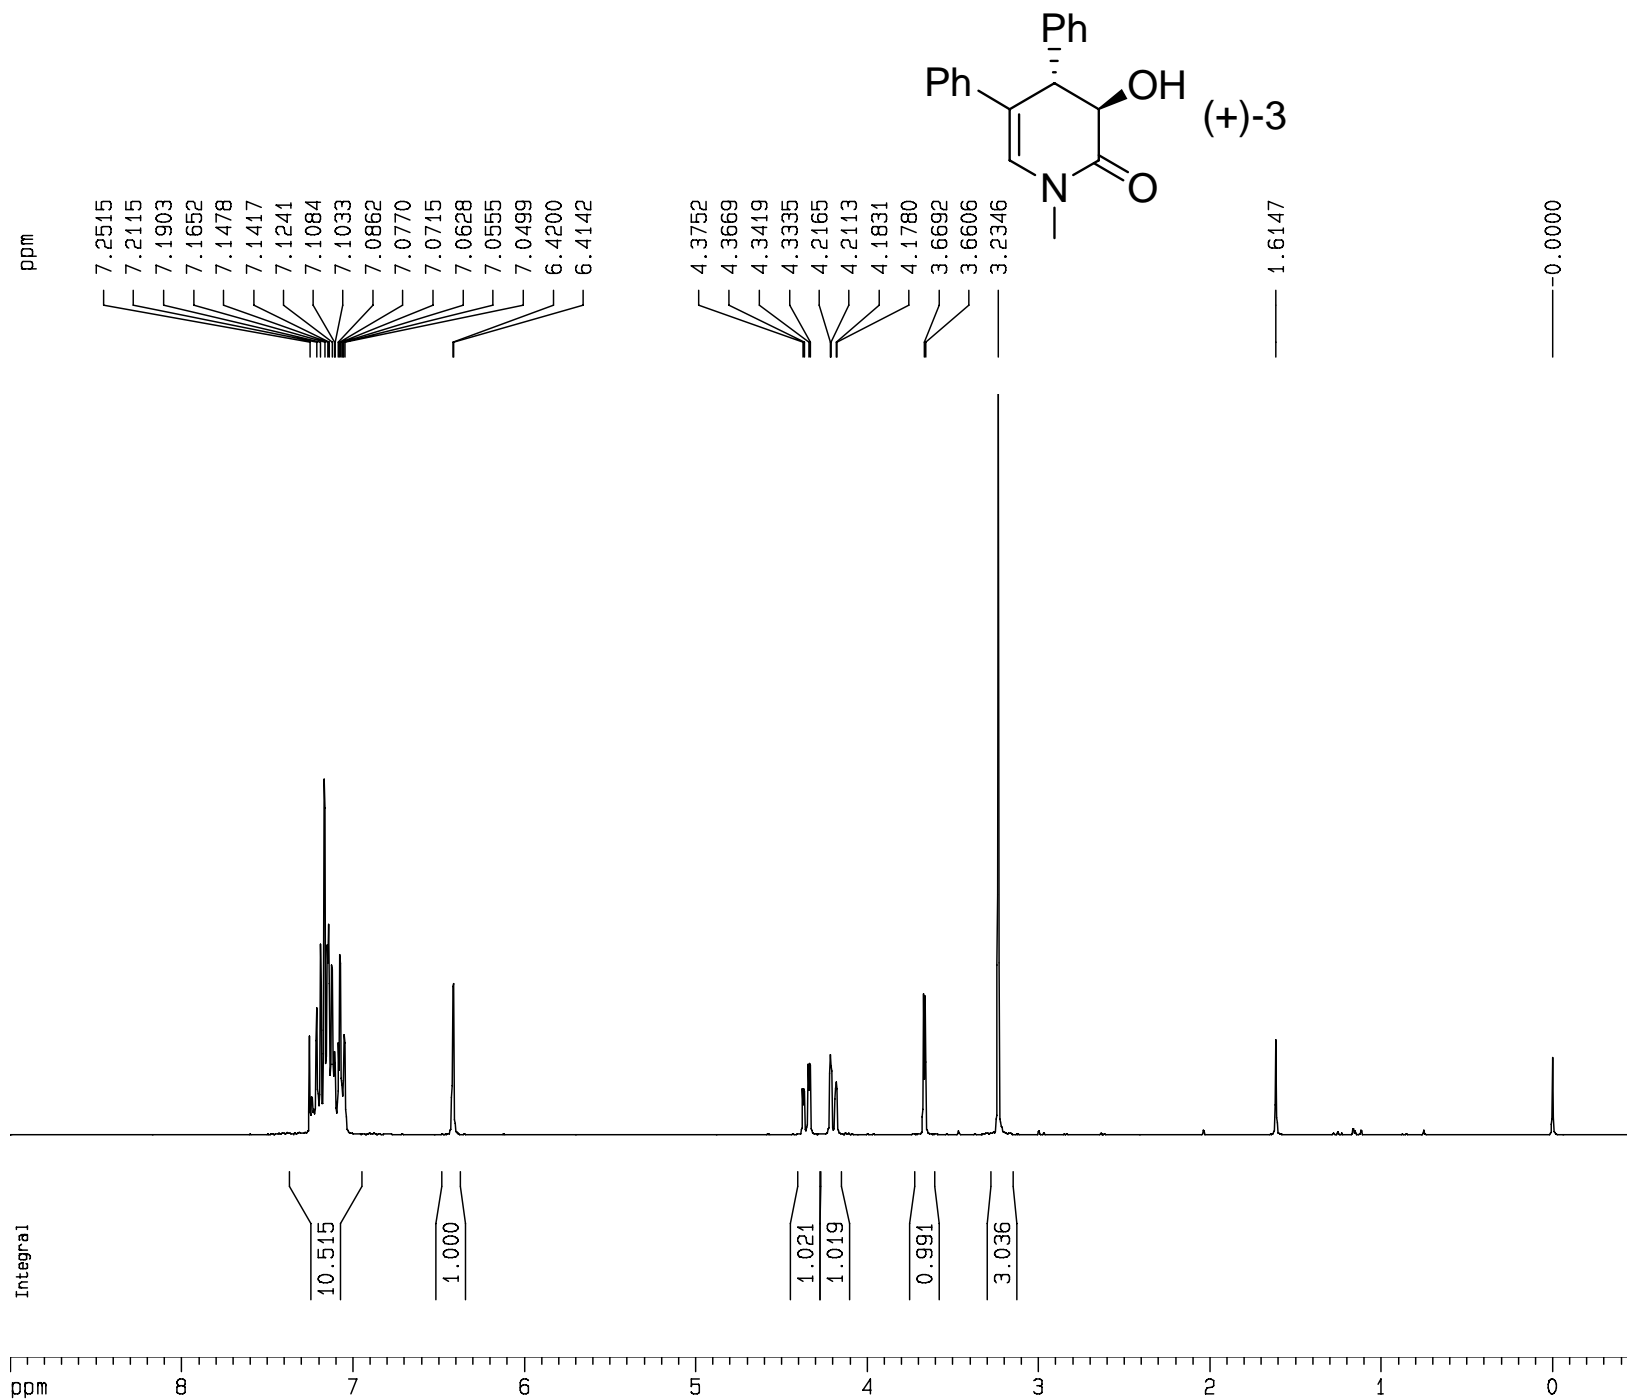

Current Data Parameters  
 NAME y1R055-1  
 EXPNO 31  
 PROCNO 1

F2 - Acquisition Parameters  
 Date\_ 20080605  
 Time 20.34  
 INSTRUM spect  
 PROBHD 5 mm DUL 13C-1  
 PULPROG zg30  
 TD 65536  
 SOLVENT CDCl3  
 NS 16  
 DS 0  
 SWH 8992.806 Hz  
 FIDRES 0.137219 Hz  
 AQ 3.6438515 sec  
 RG 256  
 DW 55.600 usec  
 DE 6.00 usec  
 TE 673.2 K  
 D1 1.00000000 sec  
 MCREST 0.00000000 sec  
 MCWRK 0.01500000 sec

===== CHANNEL f1 =====  
 NUC1 1H  
 P1 7.00 usec  
 PL1 -1.00 dB  
 SFO1 300.1324010 MHz

F2 - Processing parameters  
 SI 32768  
 SF 300.1300086 MHz  
 WDW EM  
 SSB 0  
 LB 0.30 Hz  
 GB 0  
 PC 1.00

1D NMR plot parameters  
 CX 22.00 cm  
 CY 10.00 cm  
 F1P 9.000 ppm  
 F1 2701.17 Hz  
 F2P -0.500 ppm  
 F2 -150.07 Hz  
 PPMCM 0.43182 ppm/cm  
 HZCM 129.60159 Hz/cm

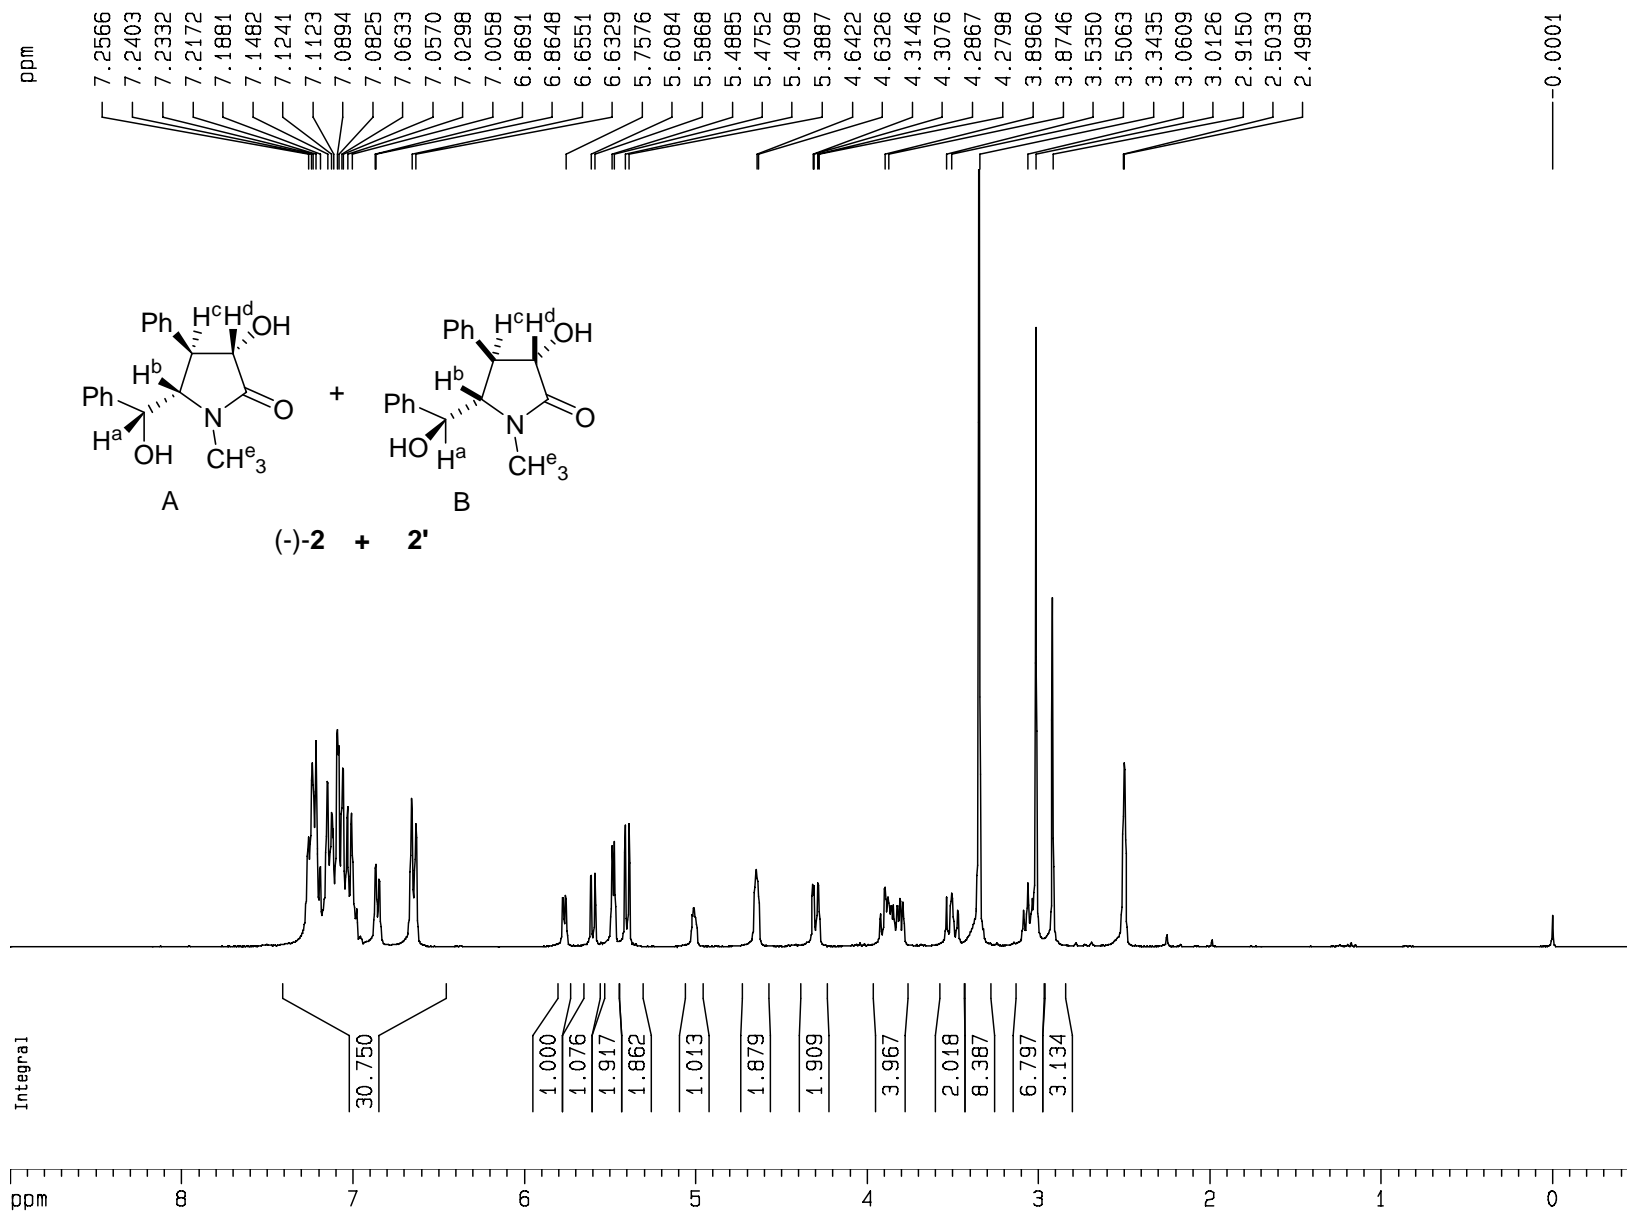

Current Data Parameters

NAME y15052  
 EXPNO 50  
 PROCNO 1

F2 - Acquisition Parameters

Date\_ 20080612  
 Time 11.20  
 INSTRUM spect  
 PROBHD 5 mm DUL 13C-1  
 PULPROG zg30  
 TD 65536  
 SOLVENT CDCl3  
 NS 16  
 DS 0  
 SWH 8992.806 Hz  
 FIDRES 0.137219 Hz  
 AQ 3.6438515 sec  
 RG 203.2  
 DW 55.600 usec  
 DE 6.00 usec  
 TE 673.2 K  
 D1 1.00000000 sec  
 MCREST 0.00000000 sec  
 MCWRK 0.01500000 sec

===== CHANNEL f1 =====

NUC1 1H  
 P1 7.00 usec  
 PL1 -1.00 dB  
 SFO1 300.1324010 MHz

F2 - Processing parameters

SI 32768  
 SF 300.1314271 MHz  
 WDW EM  
 SSB 0  
 LB 0.30 Hz  
 GB 0  
 PC 1.00

1D NMR plot parameters

CX 22.00 cm  
 CY 16.00 cm  
 F1P 9.000 ppm  
 F1 2701.18 Hz  
 F2P -0.500 ppm  
 F2 -150.07 Hz  
 PPMCM 0.43182 ppm/cm  
 HZCM 129.60222 Hz/cm

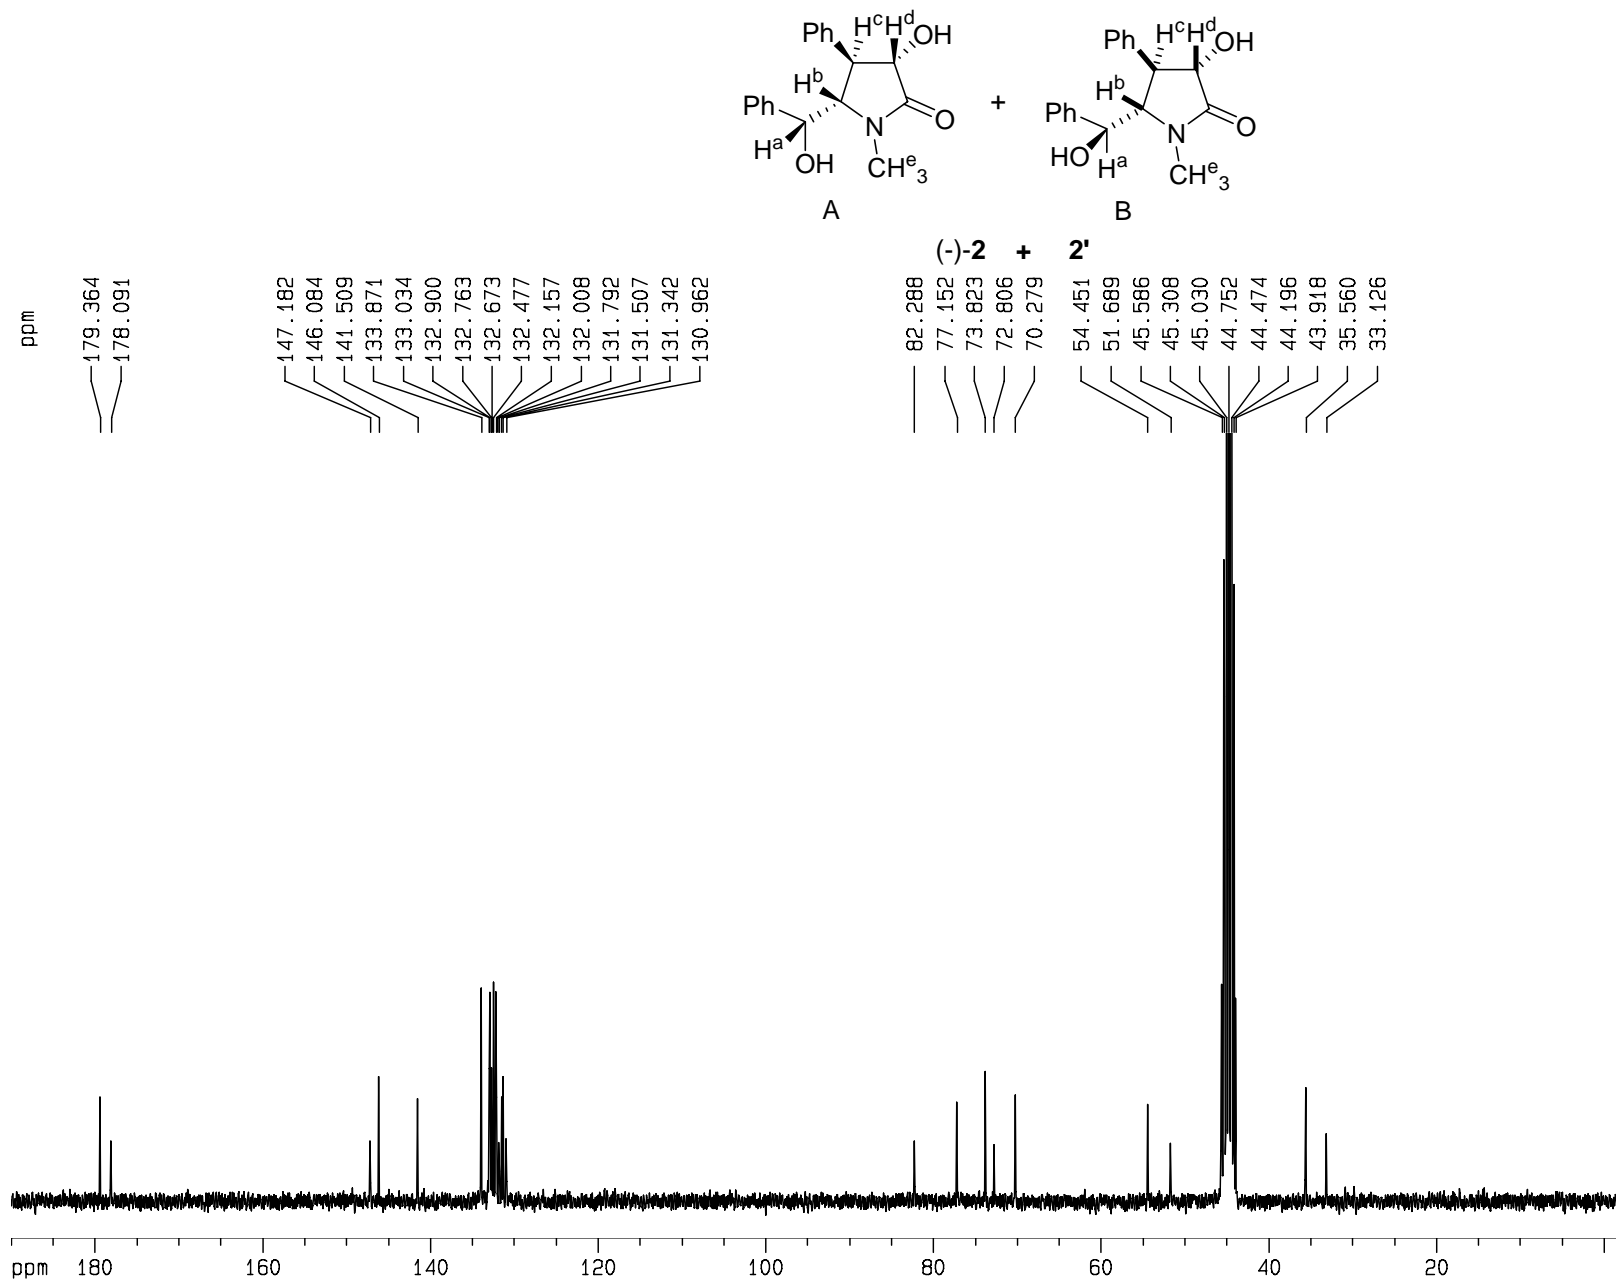

Current Data Parameters  
 NAME y1S052  
 EXPNO 51  
 PROCNO 1

F2 - Acquisition Parameters

Date\_ 20080612  
 Time 11.28  
 INSTRUM spect  
 PROBHD 5 mm DUL 13C-1  
 PULPROG zgpg30  
 TD 65536  
 SOLVENT CDC13  
 VS 590  
 JS 4  
 SWH 17985.611 Hz  
 FIDRES 0.274439 Hz  
 AQ 1.8219508 sec  
 RG 5792.6  
 JW 27.800 usec  
 JE 6.00 usec  
 TE 673.2 K  
 J1 2.0000000 sec  
 J11 0.0300000 sec  
 DELTA 1.89999998 sec  
 VCREST 0.0000000 sec  
 VCWRK 0.01500000 sec

===== CHANNEL f1 =====

VUC1 13C  
 P1 12.50 usec  
 PL1 2.00 dB  
 SFO1 75.4752953 MHz

===== CHANNEL f2 =====

CPDPRG2 waltz16  
 VUC2 1H  
 PCPD2 80.00 usec  
 PL2 -1.00 dB  
 PL12 20.16 dB  
 PL13 15.98 dB  
 SFO2 300.1312005 MHz

F2 - Processing parameters

SI 32768  
 SF 75.4677490 MHz  
 #DW EM  
 SSB 0  
 .B 1.00 Hz  
 SB 0  
 TC 1.40

1D NMR plot parameters

CX 22.00 cm  
 CY 20.00 cm  
 F1P 190.000 ppm  
 F1 14338.87 Hz  
 F2P -2.000 ppm  
 F2 -150.94 Hz  
 PPMCM 8.72727 ppm/cm  
 HZCM 658.62756 Hz/cm

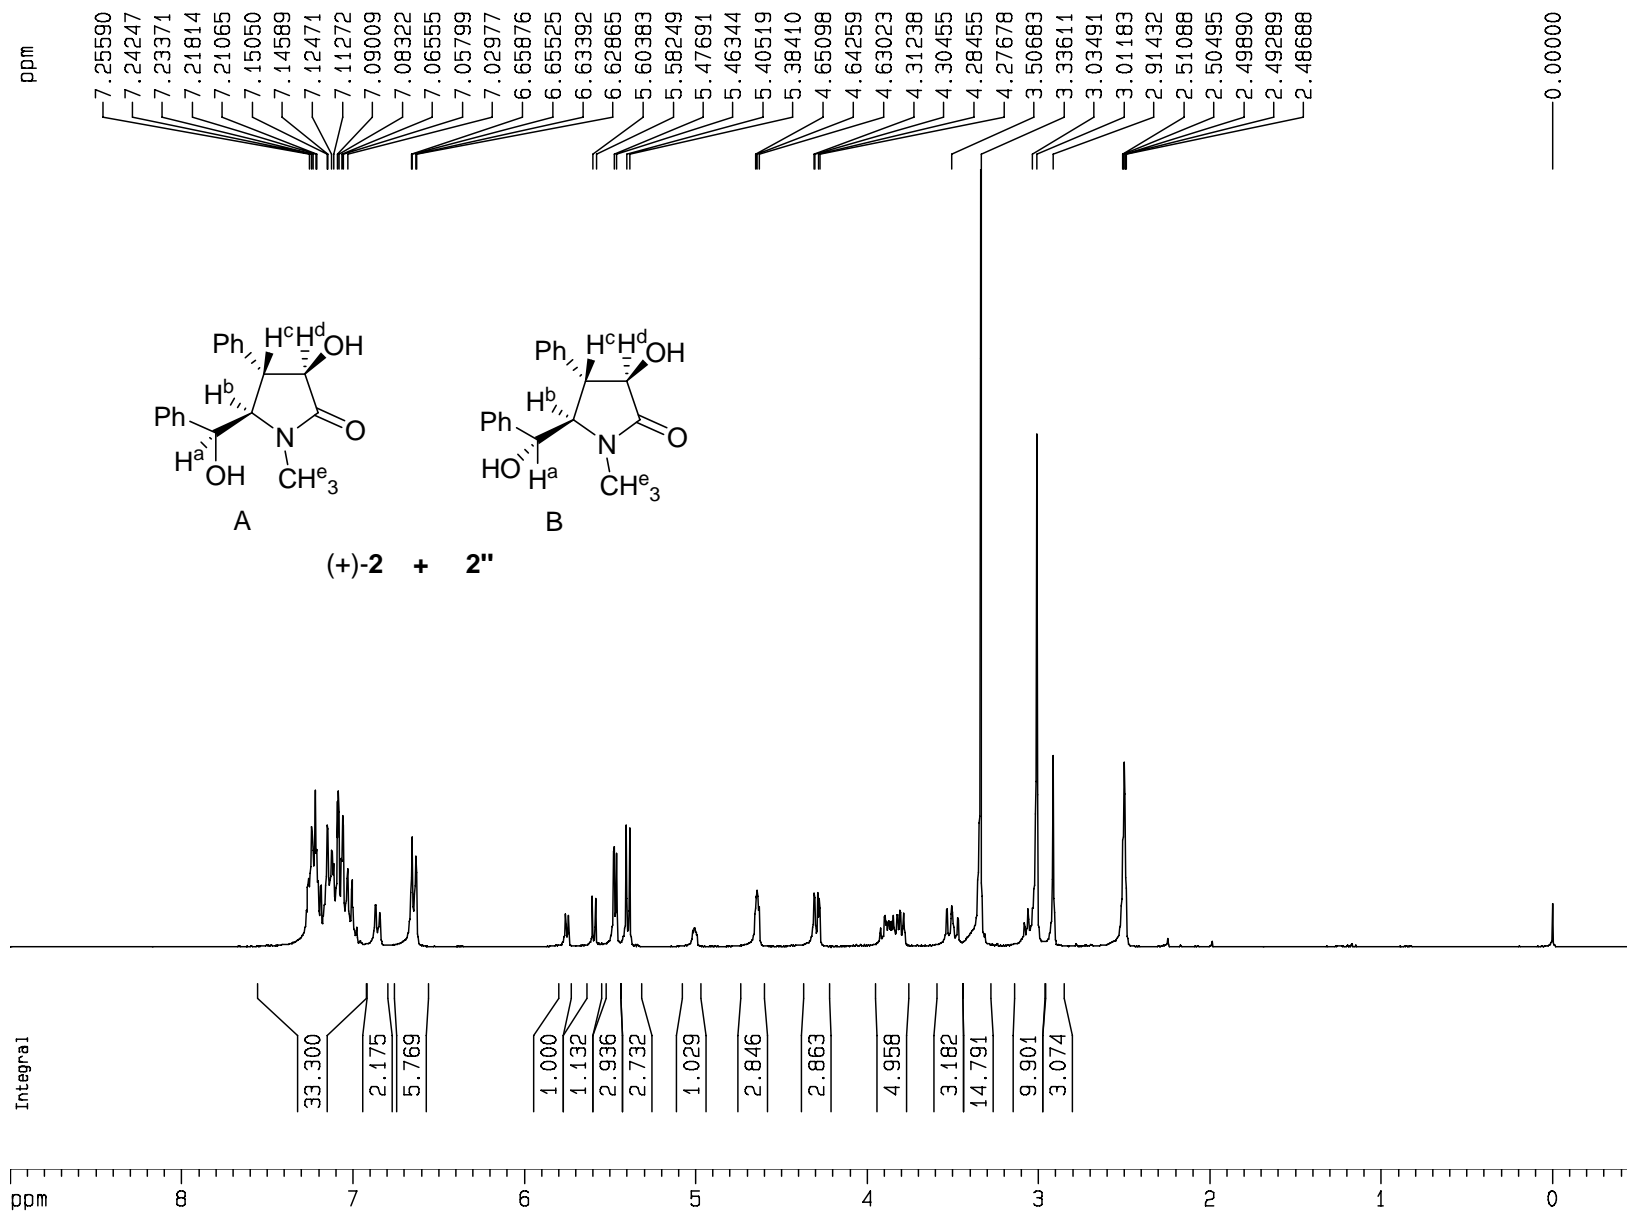

Current Data Parameters

NAME y1R052  
 EXPNO 30  
 PROCNO 1

F2 - Acquisition Parameters

Date\_ 20080611  
 Time 20.36  
 INSTRUM spect  
 PROBHD 5 mm DUL 13C-1  
 PULPROG zg30  
 TD 65536  
 SOLVENT DMSO  
 NS 16  
 DS 0  
 SWH 8992.806 Hz  
 FIDRES 0.137219 Hz  
 AQ 3.6438515 sec  
 RG 362  
 DW 55.600 usec  
 DE 6.00 usec  
 TE 673.2 K  
 D1 1.00000000 sec  
 MCREST 0.00000000 sec  
 MCWRK 0.01500000 sec

===== CHANNEL f1 =====

NUC1 1H  
 P1 7.00 usec  
 PL1 -1.00 dB  
 SF01 300.1324010 MHz

F2 - Processing parameters

SI 32768  
 SF 300.1300009 MHz  
 WDW EM  
 SSB 0  
 LB 0.30 Hz  
 GB 0  
 PC 1.00

1D NMR plot parameters

CX 22.00 cm  
 CY 20.00 cm  
 F1P 9.000 ppm  
 F1 2701.17 Hz  
 F2P -0.500 ppm  
 F2 -150.07 Hz  
 PPMCM 0.43182 ppm/cm  
 HZCM 129.60159 Hz/cm

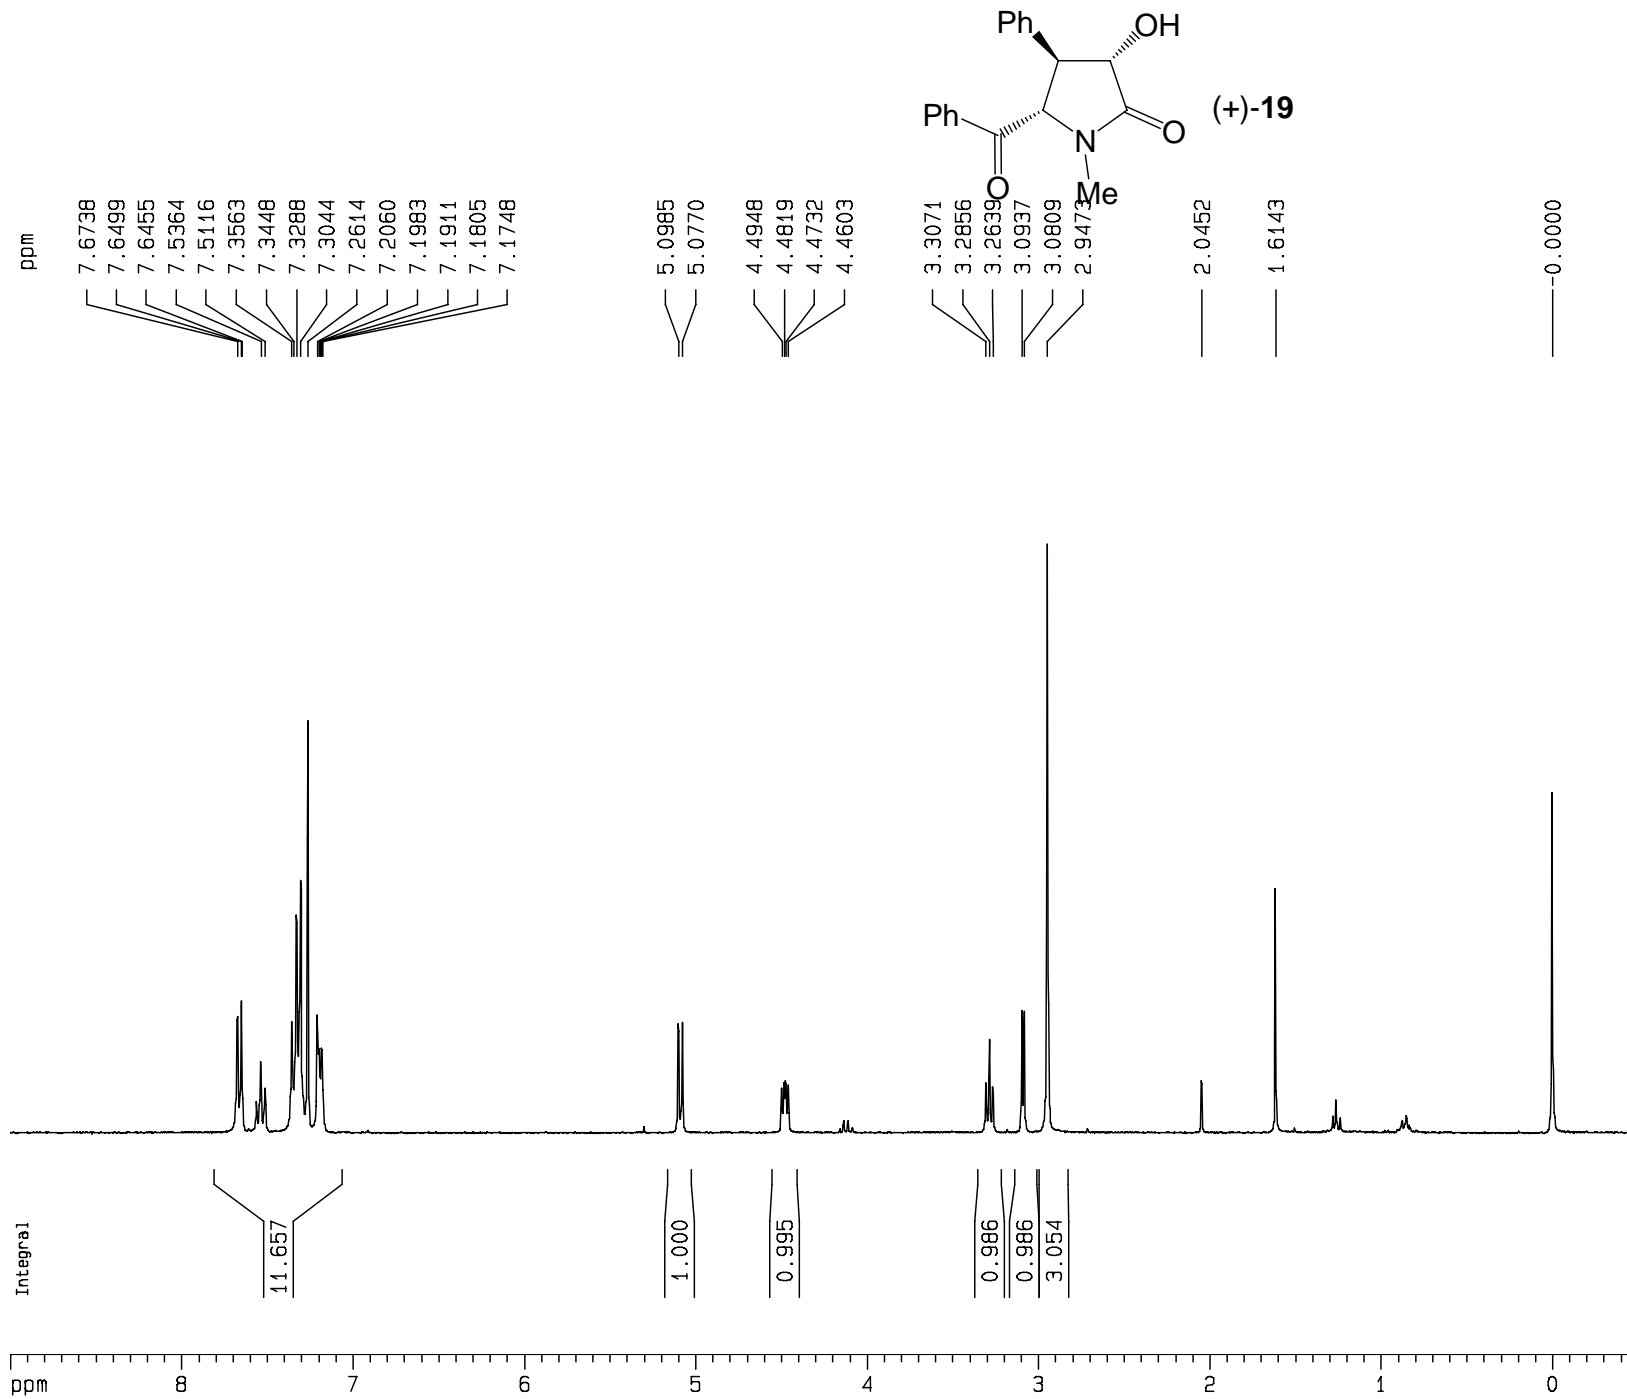

Current Data Parameters

NAME y1S157-1  
EXPNO 10  
PROCNO 1

F2 - Acquisition Parameters

Date\_ 20081120  
Time 19.29  
INSTRUM spect  
PROBHD 5 mm DUL 13C-1  
PULPROG zg30  
TD 65536  
SOLVENT CDC13  
NS 16  
DS 0  
SWH 8992.806 Hz  
FIDRES 0.137219 Hz  
AQ 3.6438515 sec  
RG 362  
DW 55.600 usec  
DE 6.00 usec  
TE 297.5 K  
D1 1.00000000 sec  
MCREST 0.00000000 sec  
MCWRK 0.01500000 sec

===== CHANNEL f1 =====

NUC1 1H  
P1 7.00 usec  
PL1 -1.00 dB  
SF01 300.1324010 MHz

F2 - Processing parameters

SI 32768  
SF 300.1300055 MHz  
WDW EM  
SSB 0  
LB 0.30 Hz  
GB 0  
PC 1.00

1D NMR plot parameters

CX 22.00 cm  
CY 8.00 cm  
F1P 9.000 ppm  
F1 2701.17 Hz  
F2P -0.500 ppm  
F2 -150.07 Hz  
PPMCM 0.43182 ppm/cm  
HZCM 129.60159 Hz/cm

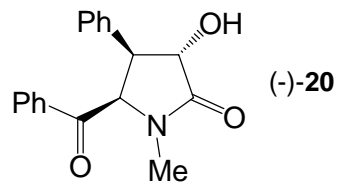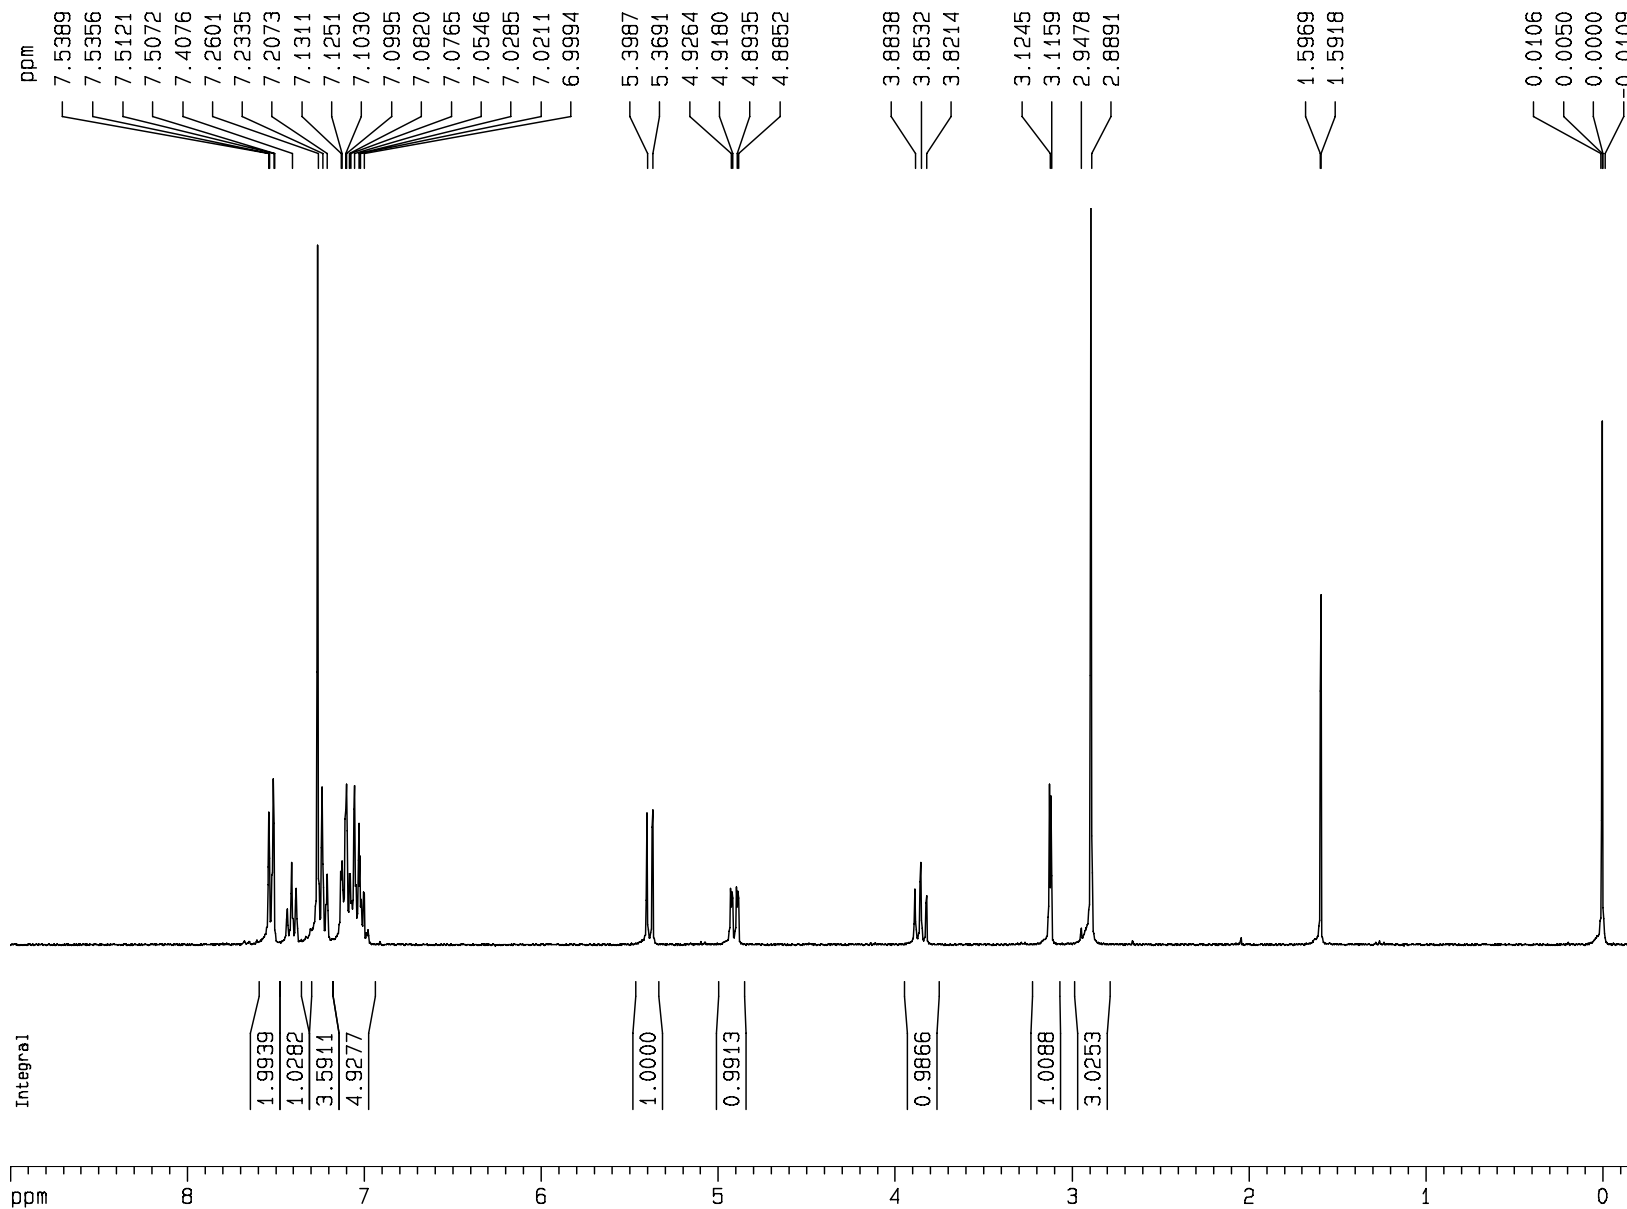

Current Data Parameters

NAME y1157-2  
 EXPNO 10  
 PROCNO 1

F2 - Acquisition Parameters

Date\_ 20081016  
 Time 20.01  
 INSTRUM spect  
 PROBHD 5 mm DUL 13C-1  
 PULPROG zg30  
 TD 65536  
 SOLVENT CDCl3  
 NS 16  
 DS 0  
 SWH 8992.806 Hz  
 FIDRES 0.137219 Hz  
 AQ 3.6438515 sec  
 RG 362  
 DW 55.600 usec  
 DE 6.00 usec  
 TE 300.4 K  
 D1 1.00000000 sec  
 MCREST 0.00000000 sec  
 MCWRK 0.01500000 sec

===== CHANNEL f1 =====

NUC1 1H  
 P1 7.00 usec  
 PL1 -1.00 dB  
 SF01 300.1324010 MHz

F2 - Processing parameters

SI 32768  
 SF 300.1300058 MHz  
 WDW EM  
 SSB 0  
 LB 0.30 Hz  
 GB 0  
 PC 1.00

1D NMR plot parameters

CX 22.00 cm  
 CY 10.00 cm  
 F1P 9.000 ppm  
 F1 2701.17 Hz  
 F2P -0.200 ppm  
 F2 -60.03 Hz  
 PPMCM 0.41818 ppm/cm  
 HZCM 125.50892 Hz/cm

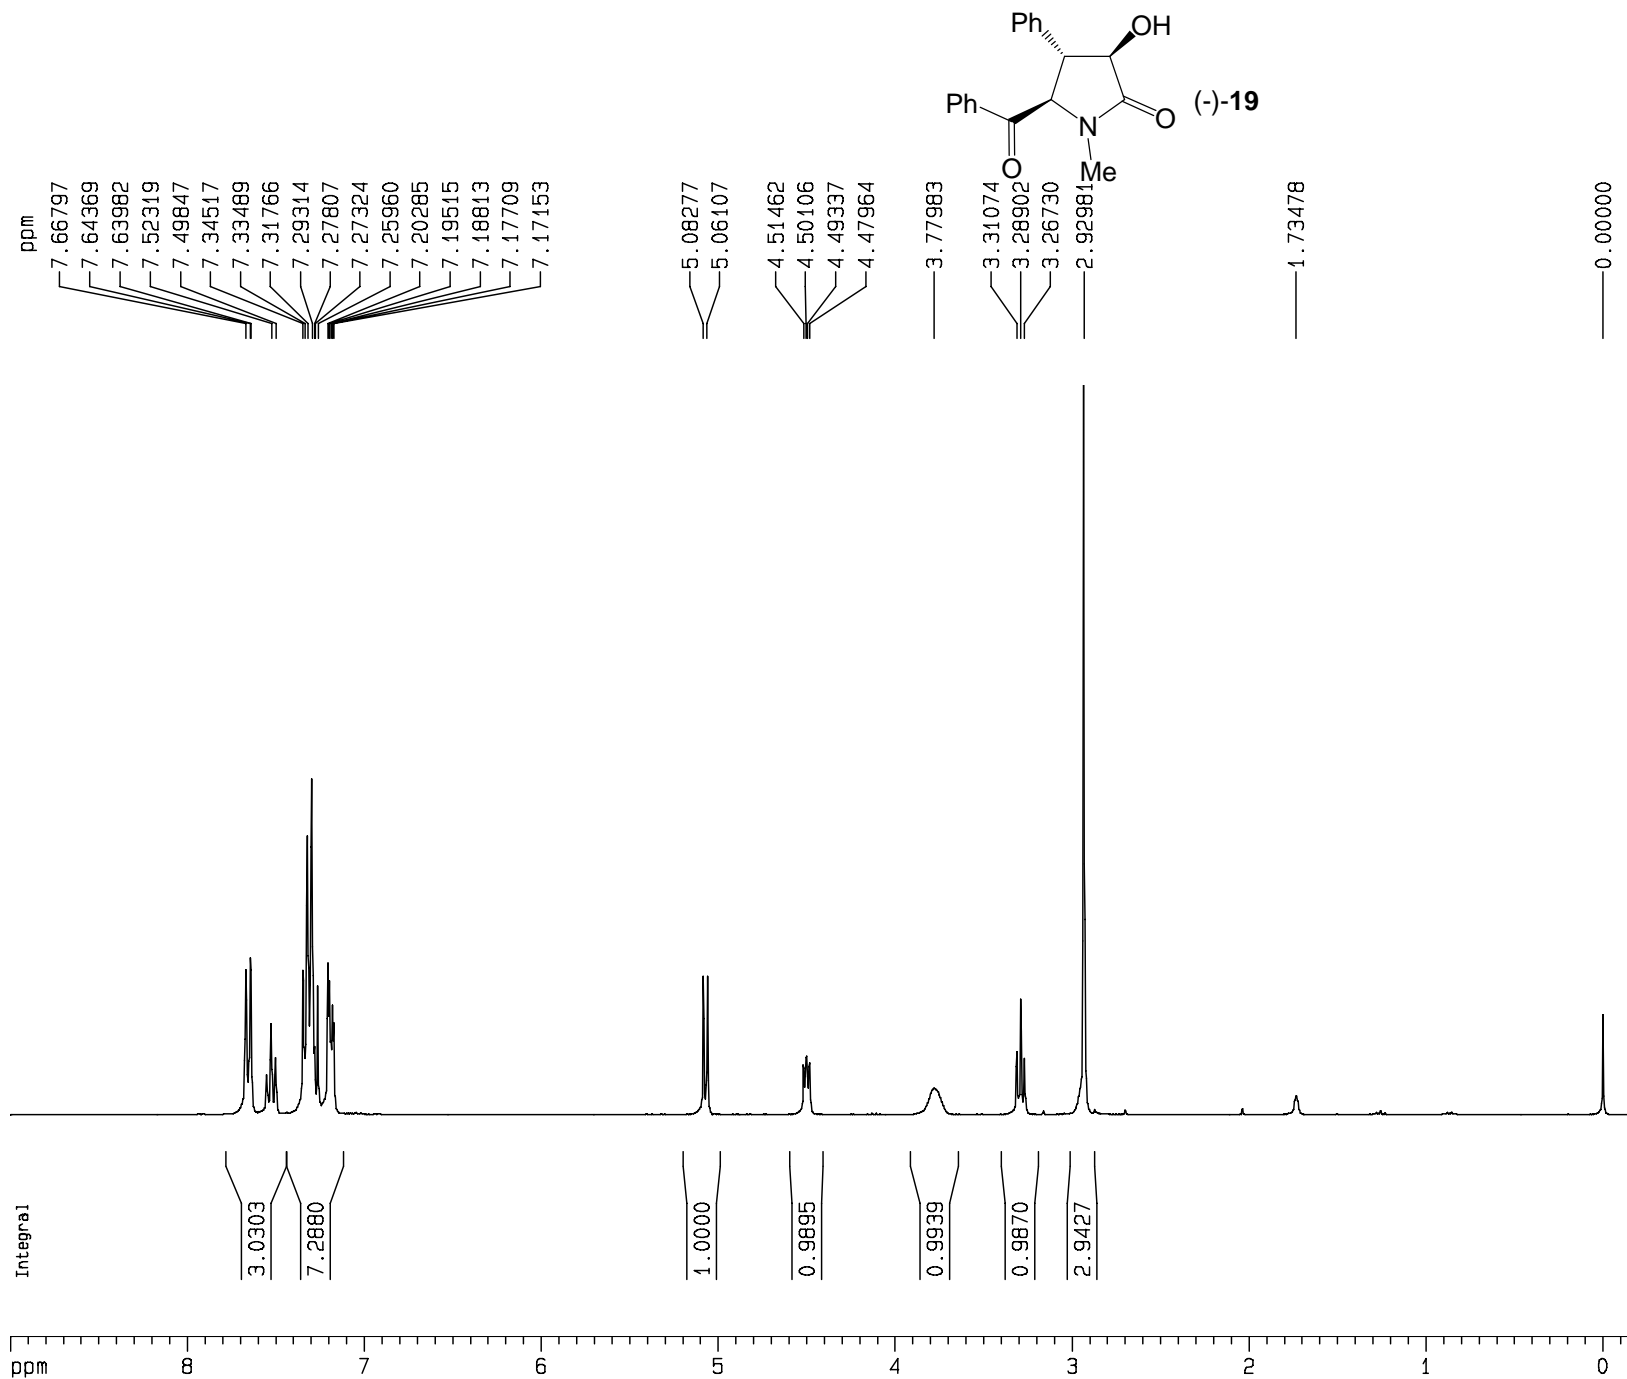

Current Data Parameters

NAME y1157-1  
EXPNO 10  
PROCNO 1

F2 - Acquisition Parameters

Date\_ 20081015  
Time 20.04  
INSTRUM spect  
PROBHD 5 mm DUL 13C-1  
PULPROG zg30  
TD 65536  
SOLVENT CDCl3  
NS 16  
DS 0  
SWH 8992.806 Hz  
FIDRES 0.137219 Hz  
AQ 3.6438515 sec  
RG 362  
DW 55.600 usec  
DE 6.00 usec  
TE 302.7 K  
D1 1.00000000 sec  
MCREST 0.00000000 sec  
MCWRK 0.01500000 sec

===== CHANNEL f1 =====

NUC1 1H  
P1 7.00 usec  
PL1 -1.00 dB  
SF01 300.1324010 MHz

F2 - Processing parameters

SI 32768  
SF 300.1300061 MHz  
WDW EM  
SSB 0  
LB 0.30 Hz  
GB 0  
PC 1.00

1D NMR plot parameters

CX 22.00 cm  
CY 10.00 cm  
F1P 9.000 ppm  
F1 2701.17 Hz  
F2P -0.200 ppm  
F2 -60.03 Hz  
PPMCM 0.41818 ppm/cm  
HZCM 125.50892 Hz/cm

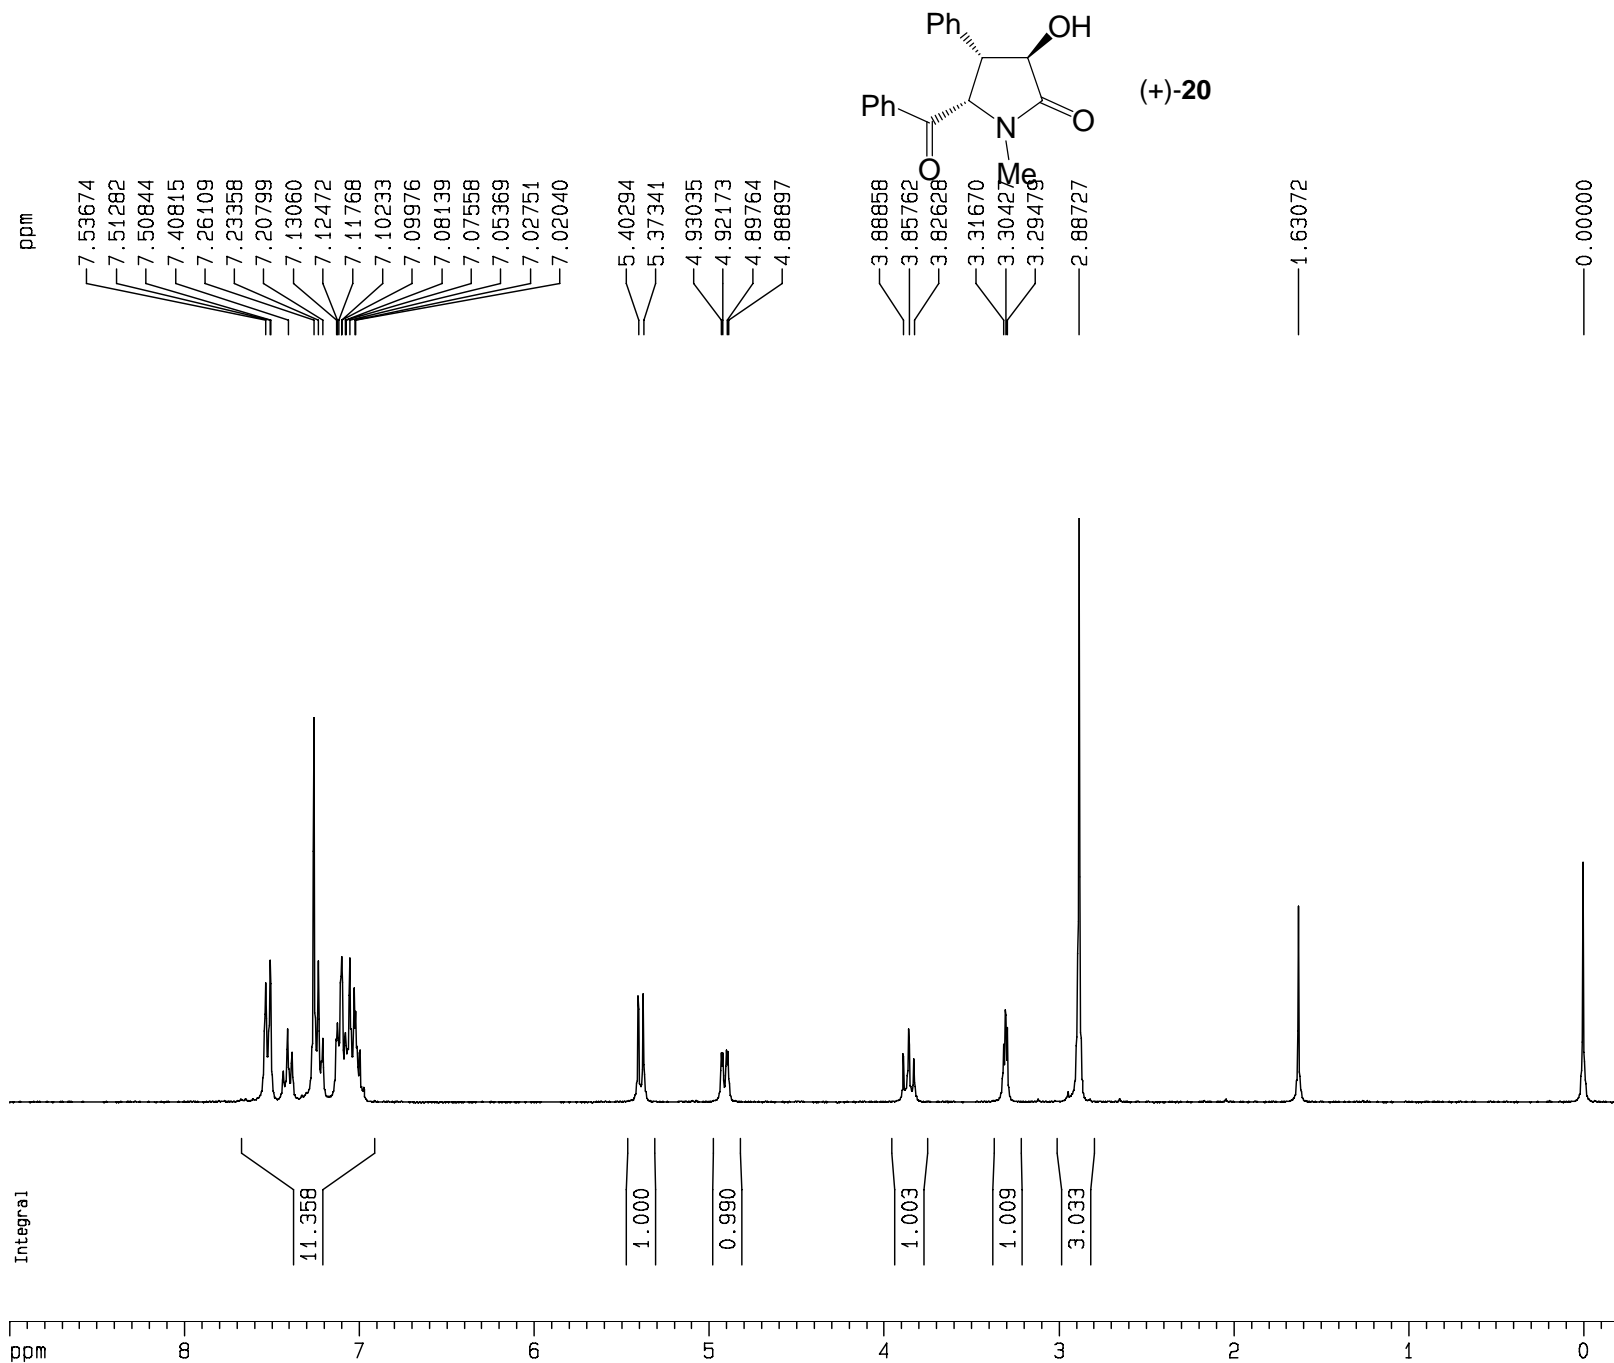

Current Data Parameters  
 NAME y1R157-2  
 EXPNO 10  
 PROCNO 1

F2 - Acquisition Parameters  
 Date\_ 20081127  
 Time 19.26  
 INSTRUM spect  
 PROBHD 5 mm DUL 13C-1  
 PULPROG zg30  
 TD 65536  
 SOLVENT CDCl3  
 NS 16  
 DS 0  
 SWH 8992.806 Hz  
 FIDRES 0.137219 Hz  
 AQ 3.6438515 sec  
 RG 362  
 DW 55.600 usec  
 DE 6.00 usec  
 TE 298.8 K  
 D1 1.00000000 sec  
 MCREST 0.00000000 sec  
 MCWRK 0.01500000 sec

==== CHANNEL f1 =====  
 NUC1 1H  
 P1 7.00 usec  
 PL1 -1.00 dB  
 SF01 300.1324010 MHz

F2 - Processing parameters  
 SI 32768  
 SF 300.1300056 MHz  
 WDW EM  
 SSB 0  
 LB 0.30 Hz  
 GB 0  
 PC 1.00

1D NMR plot parameters  
 CX 22.00 cm  
 CY 8.00 cm  
 F1P 9.000 ppm  
 F1 2701.17 Hz  
 F2P -0.200 ppm  
 F2 -60.03 Hz  
 PPMCM 0.41818 ppm/cm  
 HZCM 125.50892 Hz/cm



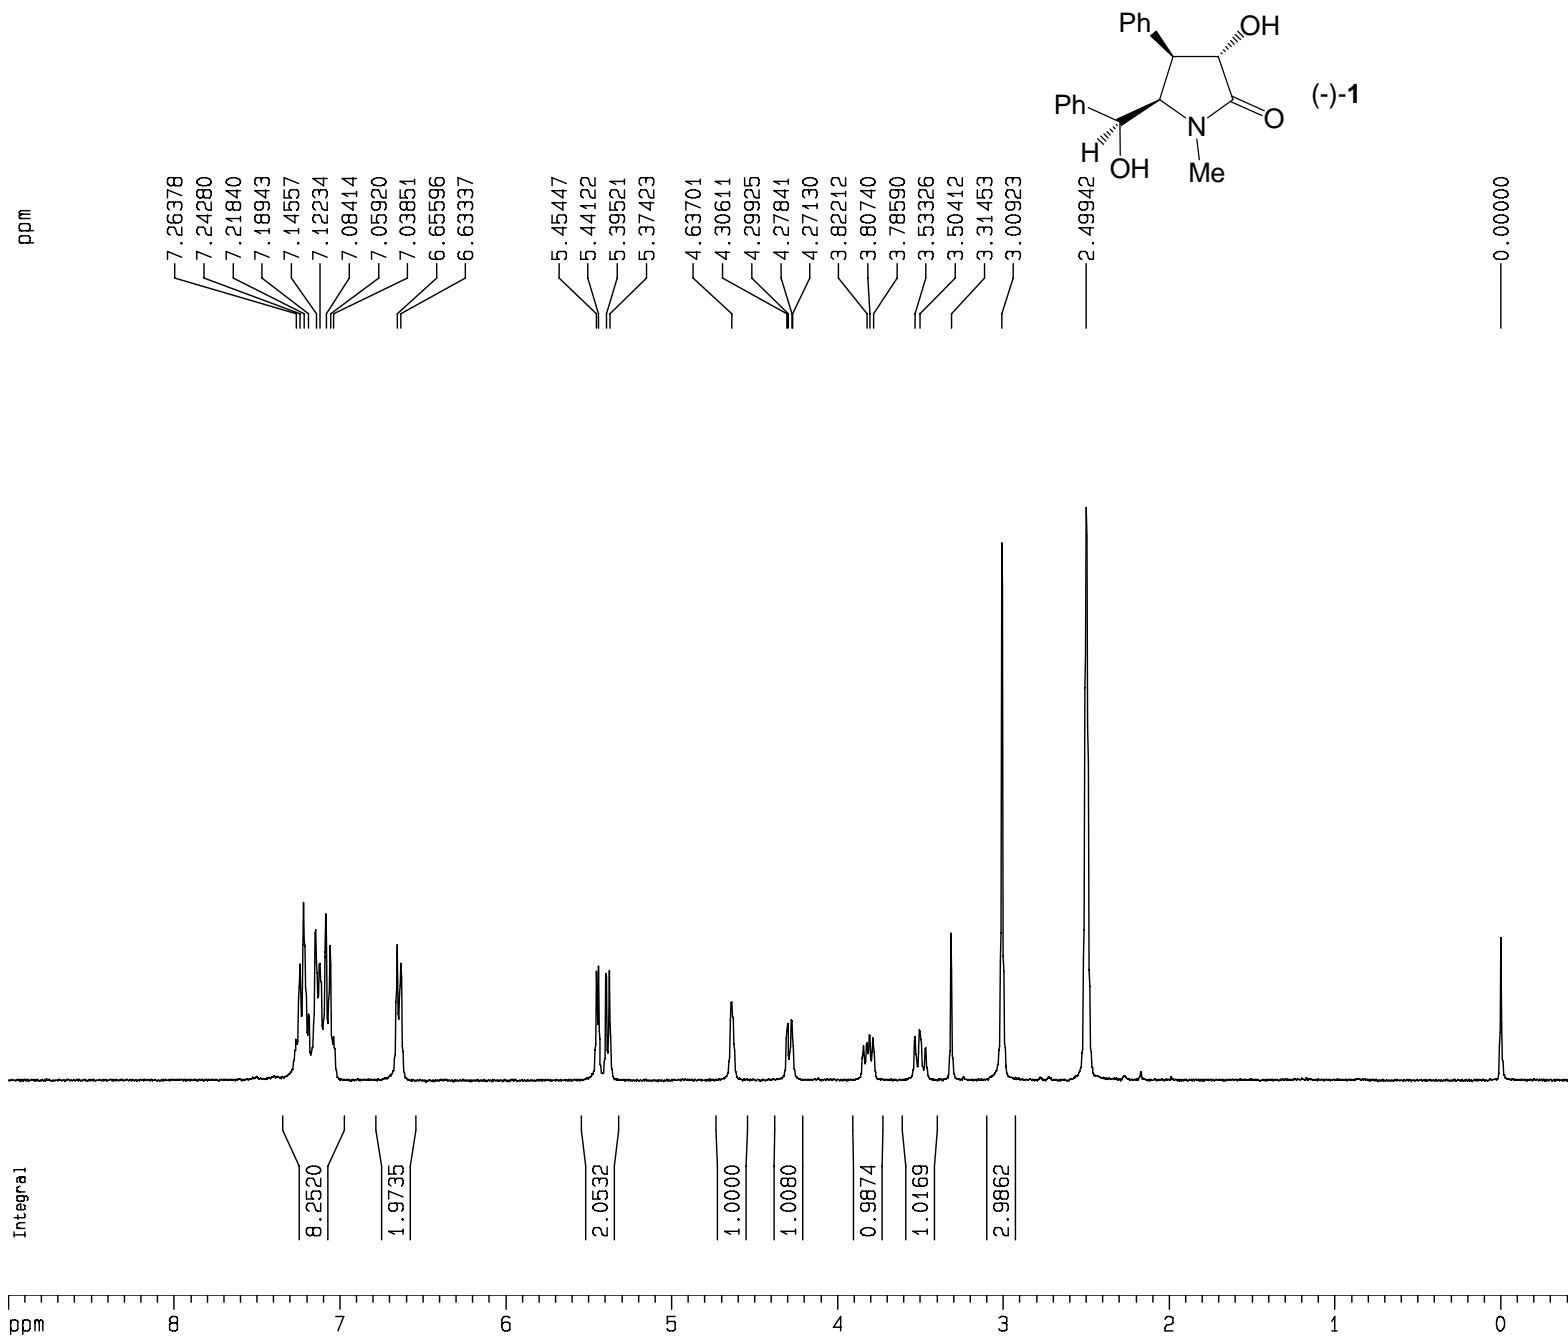

Current Data Parameters

NAME y15159  
EXPNO 10  
PROCNO 1

F2 - Acquisition Parameters

Date\_ 20081127  
Time 19.31  
INSTRUM spect  
PROBHD 5 mm DUL 13C-1  
PULPROG zg30  
TD 65536  
SOLVENT DMSO  
NS 16  
DS 0  
SWH 8992.806 Hz  
FIDRES 0.137219 Hz  
AQ 3.6438515 sec  
RG 362  
DW 55.600 usec  
DE 6.00 usec  
TE 298.6 K  
D1 1.00000000 sec  
MCREST 0.00000000 sec  
MCWPK 0.01500000 sec

===== CHANNEL f1 =====

NUC1 1H  
P1 7.00 usec  
PL1 -1.00 dB  
SFO1 300.1324010 MHz

F2 - Processing parameters

SI 32768  
SF 300.1300009 MHz  
WDW EM  
SSB 0  
LB 0.30 Hz  
GB 0  
PC 1.00

1D NMR plot parameters

CX 22.00 cm  
CY 8.00 cm  
F1P 9.000 ppm  
F1 2701.17 Hz  
F2P -0.500 ppm  
F2 -150.07 Hz  
PPMCM 0.43182 ppm/cm  
HZCM 129.60159 Hz/cm

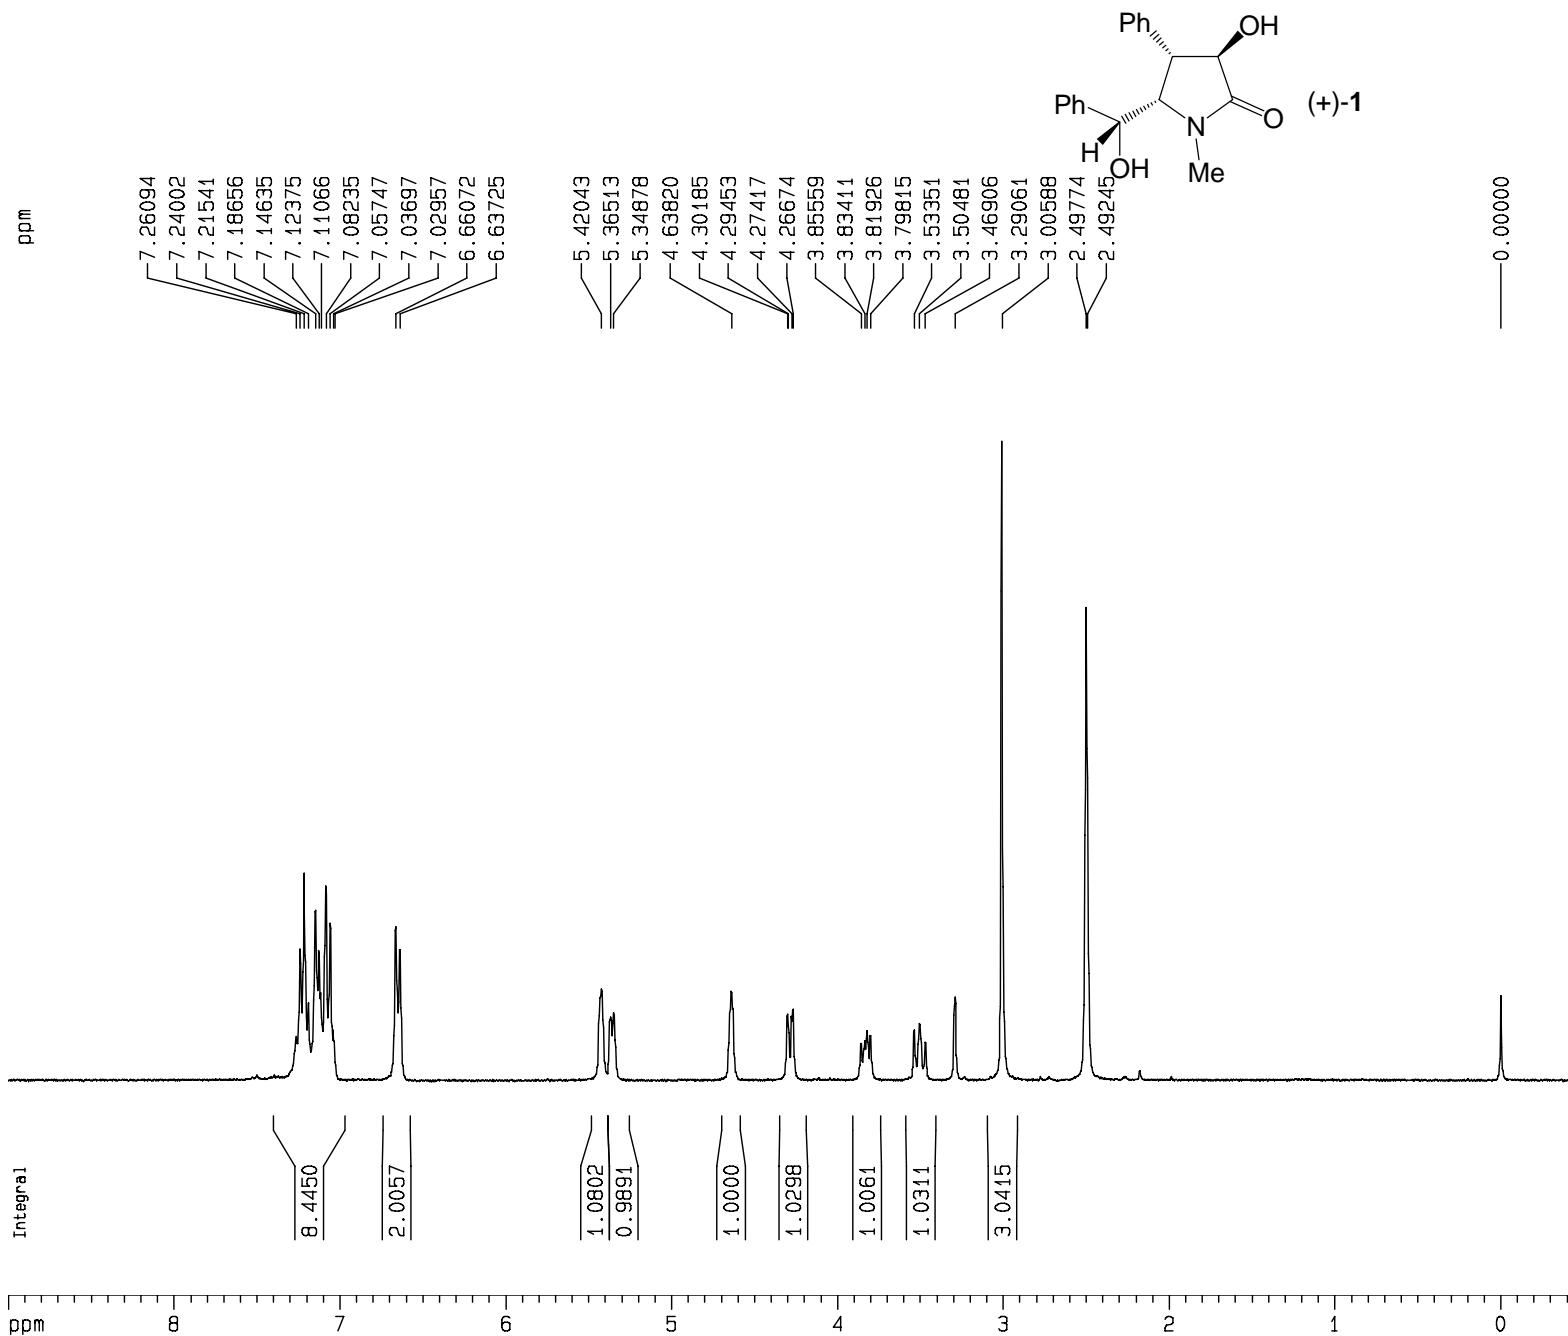

Current Data Parameters  
 NAME y1R159  
 EXPNO 10  
 PROCNO 1

F2 - Acquisition Parameters  
 Date\_ 20081128  
 Time 19.21  
 INSTRUM spect  
 PROBHD 5 mm DUL 13C-1  
 PULPROG zg30  
 TD 65536  
 SOLVENT DMSO  
 NS 16  
 DS 0  
 SWH 8992.806 Hz  
 FIDRES 0.137219 Hz  
 AQ 3.6438515 sec  
 RG 362  
 DW 55.600 usec  
 DE 6.00 usec  
 TE 299.6 K  
 D1 1.00000000 sec  
 MCREST 0.00000000 sec  
 MCWPK 0.01500000 sec

===== CHANNEL f1 =====  
 NUC1 1H  
 P1 7.00 usec  
 PL1 -1.00 dB  
 SFO1 300.1324010 MHz

F2 - Processing parameters  
 SI 32768  
 SF 300.1300017 MHz  
 WDW EM  
 SSB 0  
 LB 0.30 Hz  
 GB 0  
 PC 1.00

1D NMR plot parameters  
 CX 22.00 cm  
 CY 9.00 cm  
 F1P 9.000 ppm  
 F1 2701.17 Hz  
 F2P -0.500 ppm  
 F2 -150.07 Hz  
 PPMCM 0.43182 ppm/cm  
 HZCM 129.60159 Hz/cm

ppm

7.25703  
7.23234  
7.11794  
7.09431  
7.06905  
7.05374  
7.03327  
7.00880  
6.98085  
6.86745  
6.84605  
5.72303  
5.70792  
5.57992  
5.56104  
5.01246  
5.00111  
4.98975  
3.91792  
3.89454  
3.88380  
3.87311  
3.86096  
3.85184  
3.08429  
3.06056  
3.03696  
2.91035  
2.49787  
2.49279

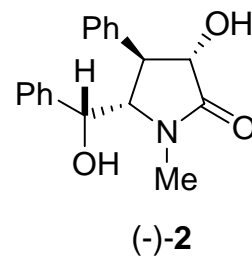

0.00000

## Current Data Parameters

NAME y1S158  
EXPNO 20  
PROCNO 1

## F2 - Acquisition Parameters

Date\_ 20081223  
Time 13.05  
INSTRUM spect  
PROBHD 5 mm DUL 13C-1  
PULPROG zg30  
TD 65536  
SOLVENT DMSO  
NS 16  
DS 0  
SWH 8992.806 Hz  
FIDRES 0.137219 Hz  
AQ 3.6438515 sec  
RG 362  
DW 55.600 usec  
DE 6.00 usec  
TE 298.3 K  
D1 1.00000000 sec  
MCREST 0.00000000 sec  
MCWRK 0.01500000 sec

## ===== CHANNEL f1 =====

NUC1 1H  
P1 7.00 usec  
PL1 -1.00 dB  
SF01 300.1324010 MHz

## F2 - Processing parameters

SI 32768  
SF 300.1300014 MHz  
WDW EM  
SSB 0  
LB 0.30 Hz  
GB 0  
PC 1.00

## 1D NMR plot parameters

CX 22.00 cm  
CY 10.00 cm  
F1P 9.000 ppm  
F1 2701.17 Hz  
F2P -0.500 ppm  
F2 -150.07 Hz  
PPMCM 0.43182 ppm/cm  
HZCM 129.60159 Hz/cm

Integra1

2.1209  
6.1634  
2.0497  
1.0273  
1.0191  
1.0000  
2.0339  
1.0172  
3.0519

ppm

Supplementary Material (ESI) for Organic & Biomolecular Chemistry  
This journal is (c) The Royal Society of Chemistry 2009

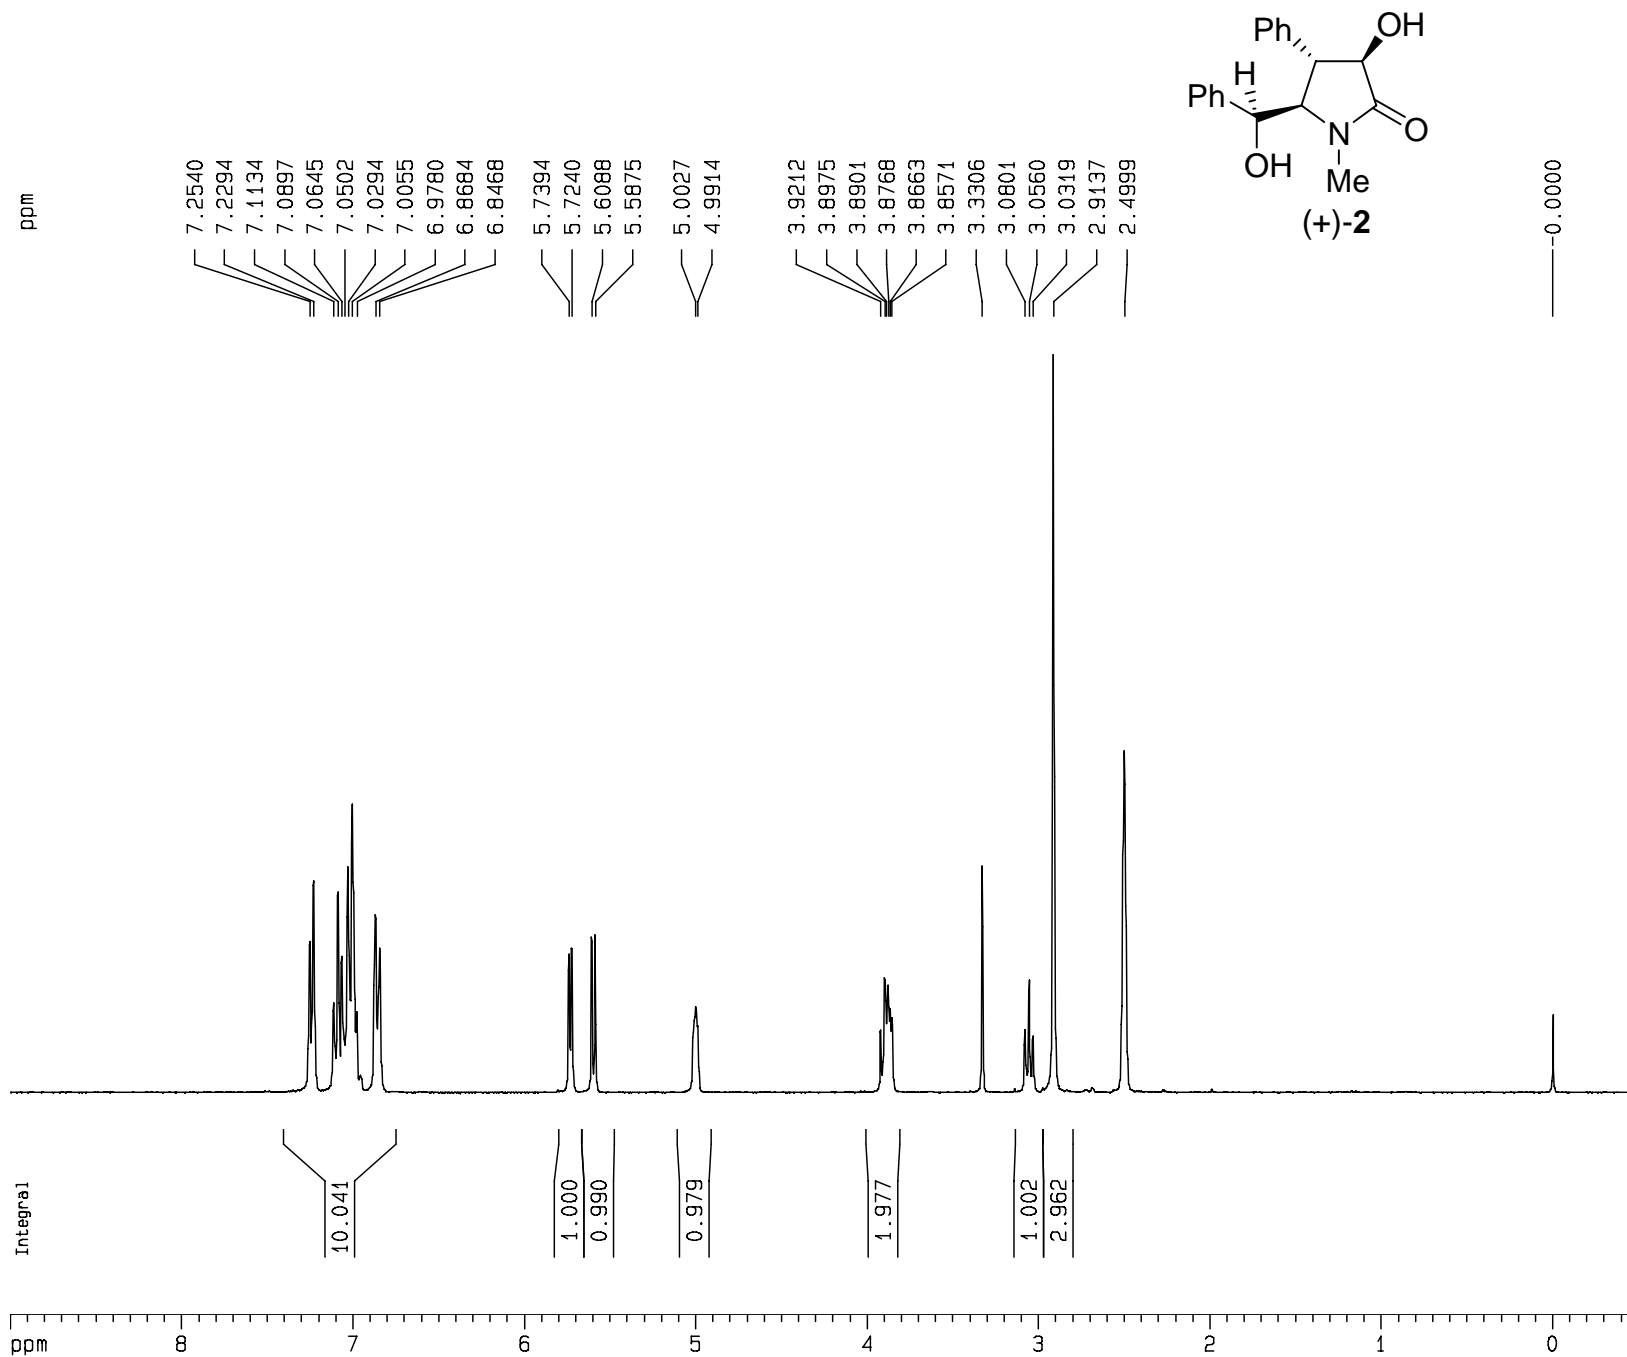

Current Data Parameters  
 NAME y1R158  
 EXPNO 40  
 PROCNO 1

F2 - Acquisition Parameters  
 Date\_ 20081223  
 Time 20.18  
 INSTRUM spect  
 PROBHD 5 mm DUL 13C-1  
 PULPROG zg30  
 TD 65536  
 SOLVENT DMSO  
 NS 16  
 DS 0  
 SWH 8992.806 Hz  
 FIDRES 0.137219 Hz  
 AQ 3.6438515 sec  
 RG 362  
 DW 55.600 usec  
 DE 6.00 usec  
 TE 295.9 K  
 D1 1.00000000 sec  
 MCREST 0.00000000 sec  
 MCWRK 0.01500000 sec

===== CHANNEL f1 =====  
 NUC1 1H  
 P1 7.00 usec  
 PL1 -1.00 dB  
 SFO1 300.1324010 MHz

F2 - Processing parameters  
 SI 32768  
 SF 300.1300007 MHz  
 WDW EM  
 SSB 0  
 LB 0.30 Hz  
 GB 0  
 PC 1.00

1D NMR plot parameters  
 CX 22.00 cm  
 CY 10.00 cm  
 F1P 9.000 ppm  
 F1 2701.17 Hz  
 F2P -0.500 ppm  
 F2 -150.07 Hz  
 PPMCM 0.43182 ppm/cm  
 HZCM 129.60159 Hz/cm

YL-55-a

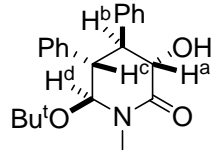

17

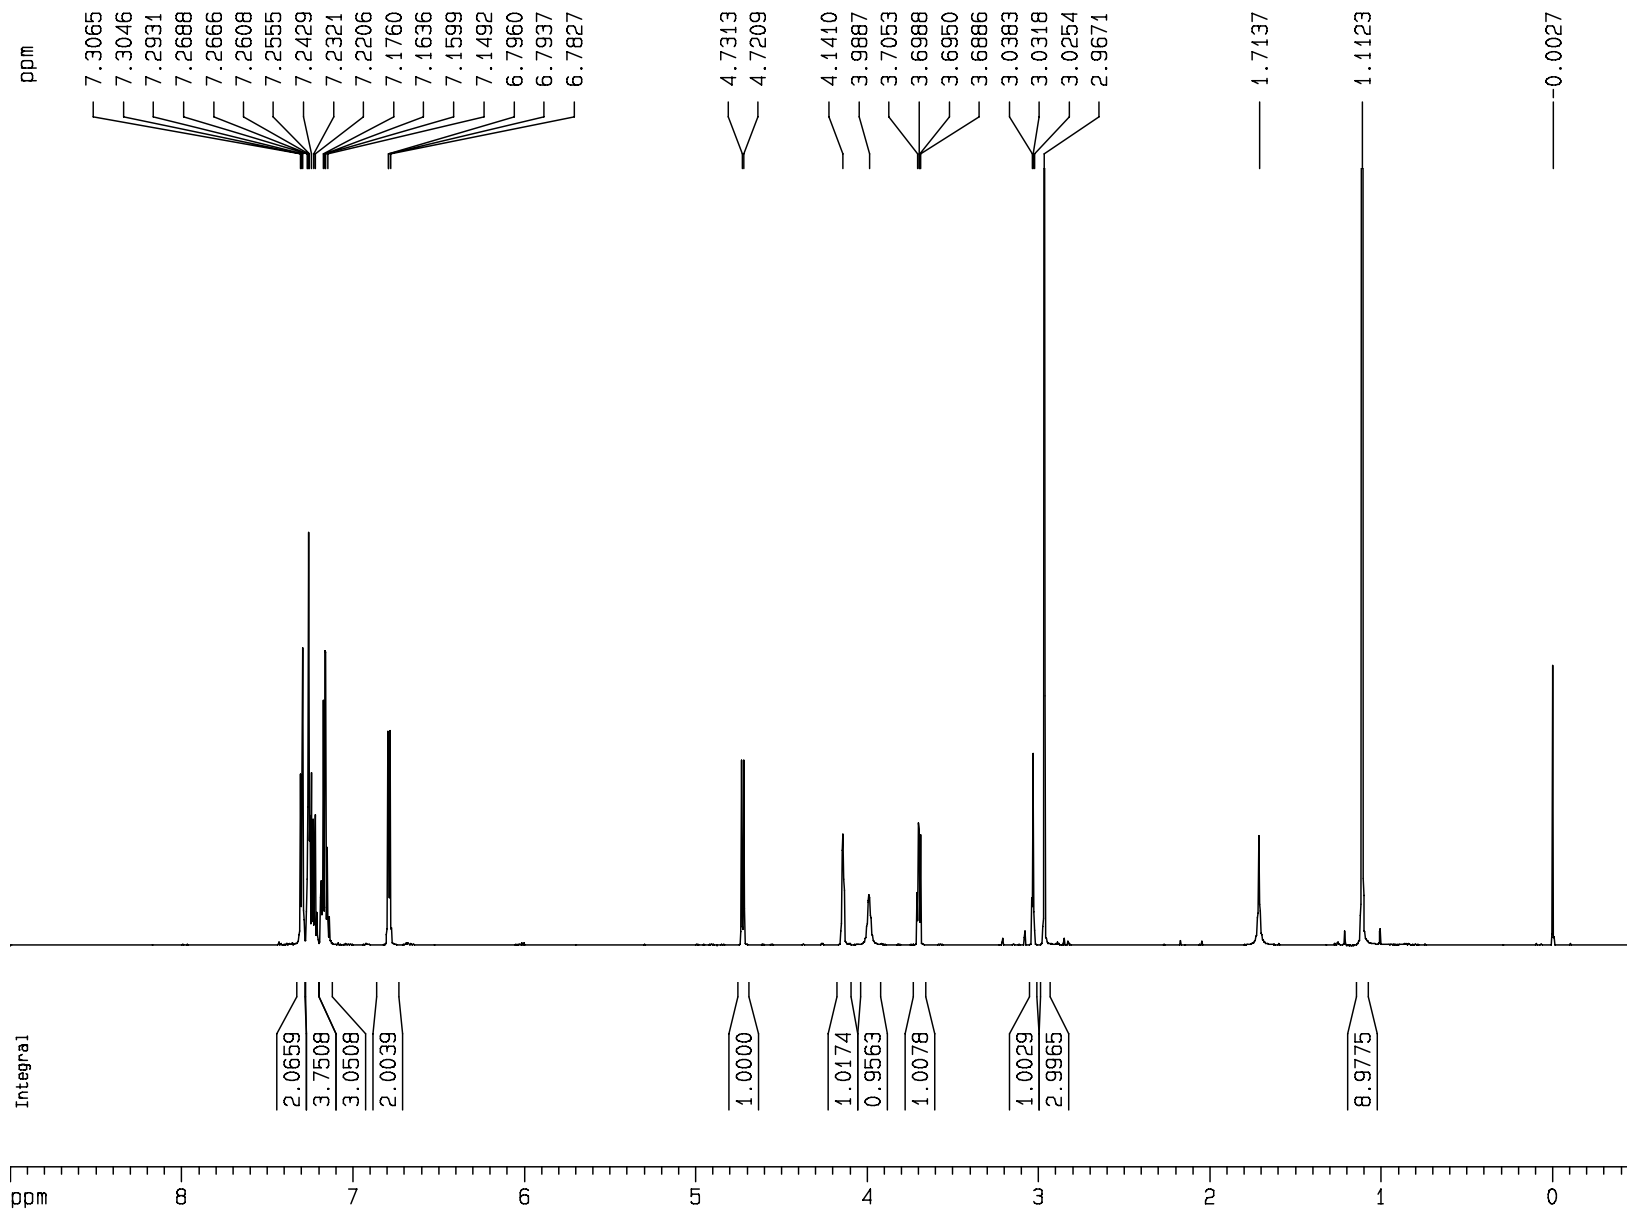

## Current Data Parameters

NAME noe  
EXPNO 4  
PROCNO 1

## F2 - Acquisition Parameters

Date\_ 20070816  
Time 15.17  
INSTRUM av600  
PROBHD 5 mm BBI 1H-BB  
PULPROG zg30  
TD 65536  
SOLVENT CDCl3  
NS 16  
DS 0  
SWH 17985.611 Hz  
FIDRES 0.274439 Hz  
AQ 1.8219508 sec  
RG 161.3  
DW 27.800 usec  
DE 6.00 usec  
TE 291.9 K  
D1 5.00000000 sec  
MCREST 0.00000000 sec  
MCWRK 0.01500000 sec

## ===== CHANNEL f1 =====

NUC1 1H  
P1 8.60 usec  
PL1 -1.00 dB  
SFO1 600.1348010 MHz

## F2 - Processing parameters

SI 32768  
SF 600.1300088 MHz  
WDW EM  
SSB 0  
LB 0.00 Hz  
GB 0  
PC 1.00

## 1D NMR plot parameters

CX 22.00 cm  
CY 50.00 cm  
F1P 9.000 ppm  
F1 5401.17 Hz  
F2P -0.500 ppm  
F2 -300.07 Hz  
PPMCM 0.43182 ppm/cm  
HZCM 259.14706 Hz/cm

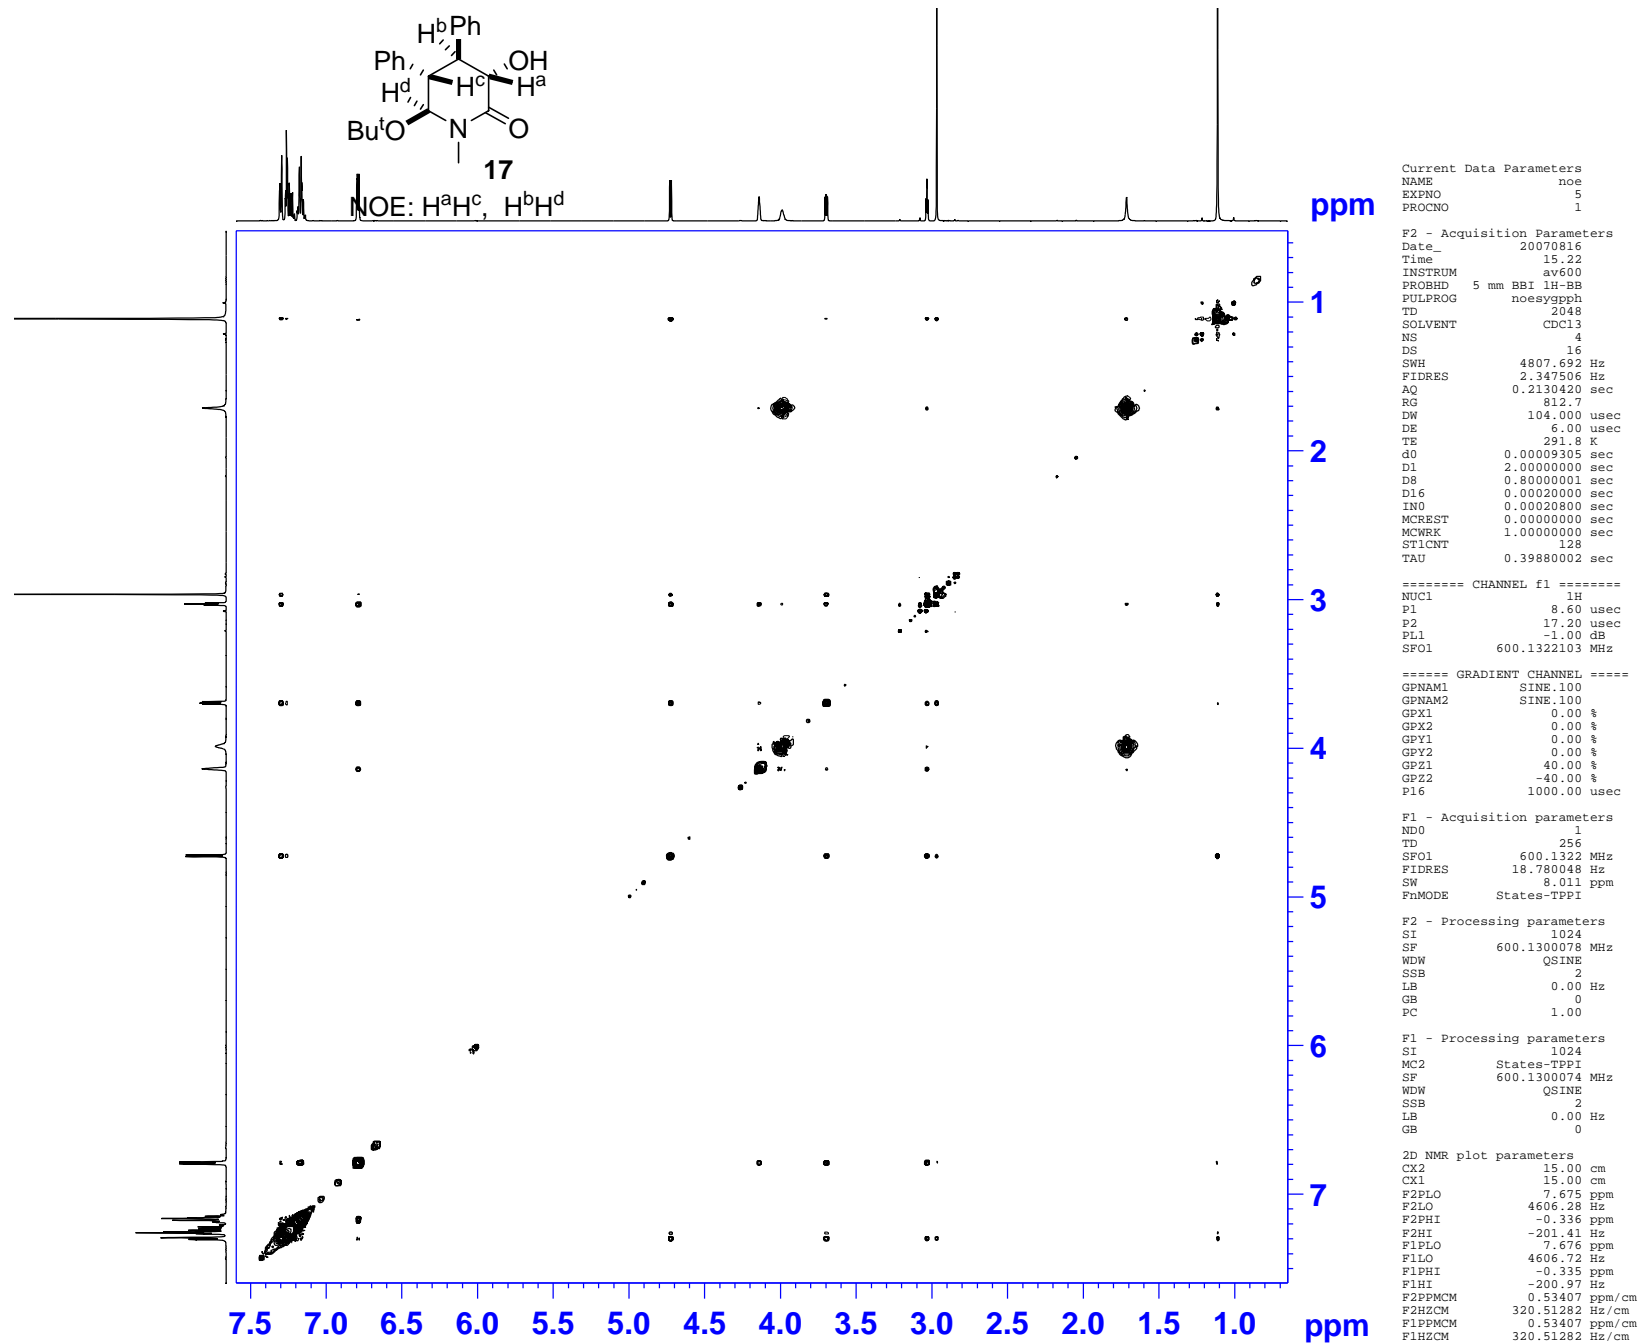

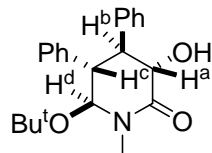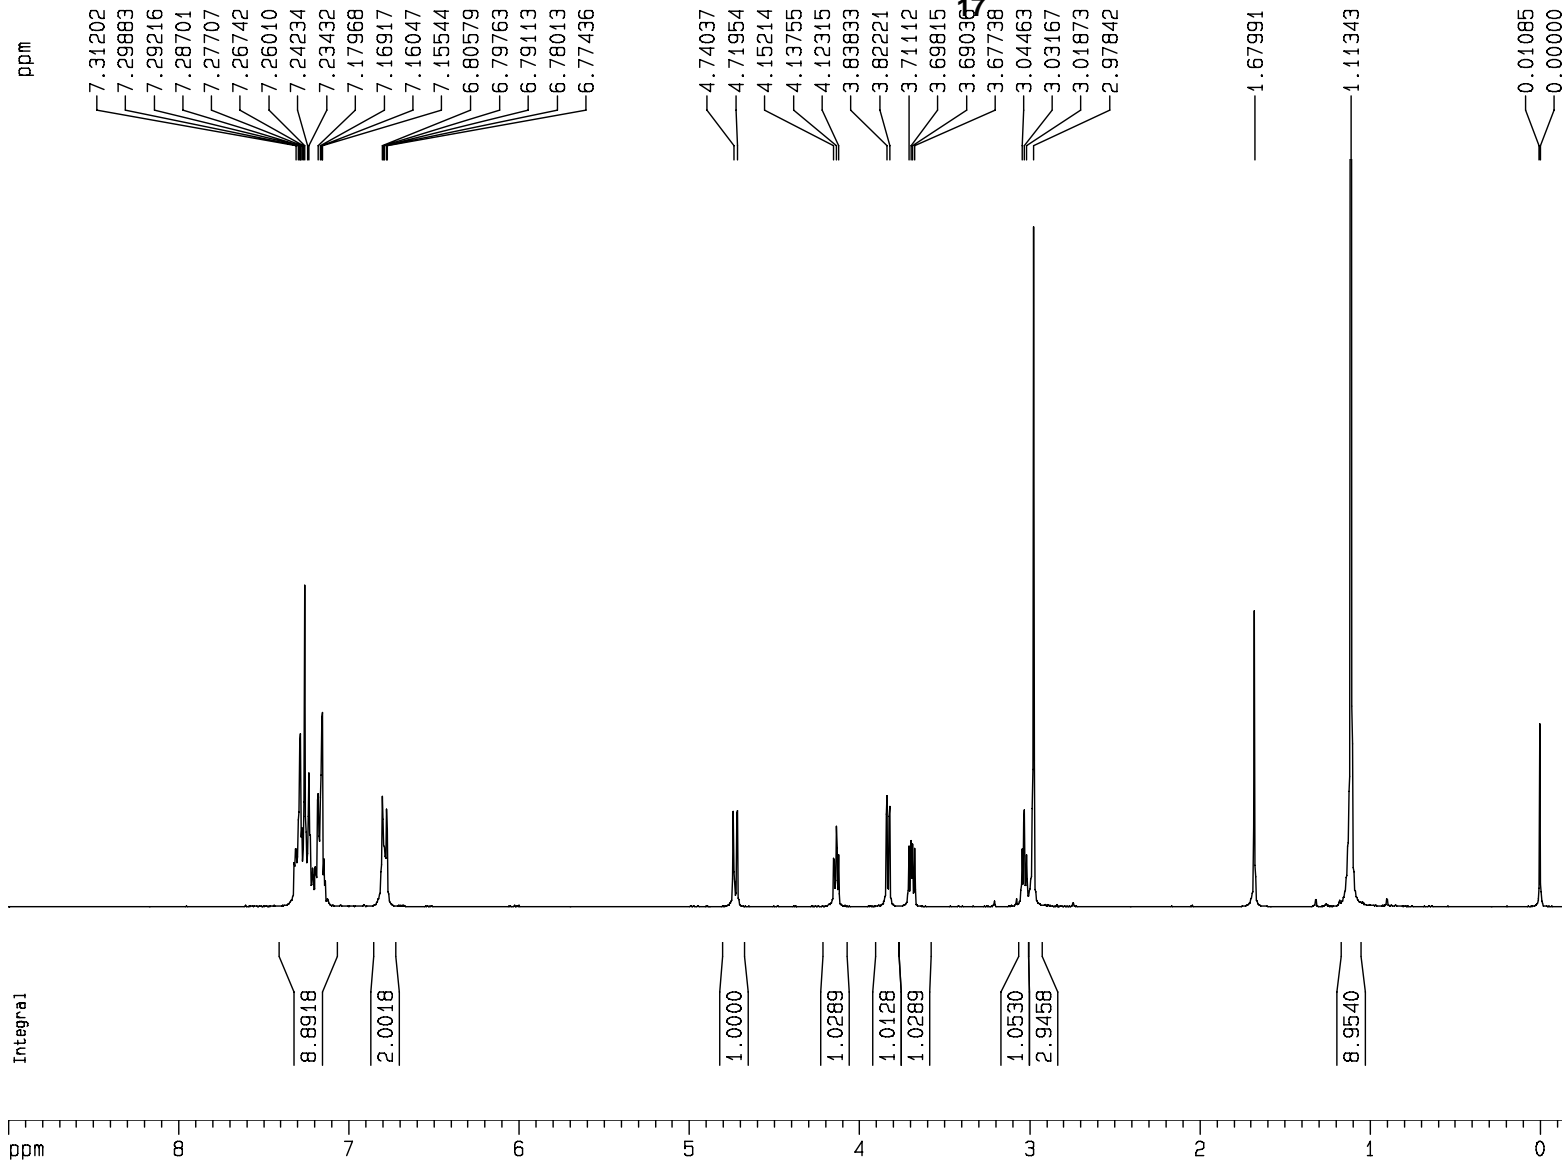

Current Data Parameters

NAME y1055-a  
 EXPNO 10  
 PROCNO 1

F2 - Acquisition Parameters

Date\_ 20070731  
 Time 8.27  
 INSTRUM av300  
 PROBHD 5 mm DUL 13C-1  
 PULPROG zg30  
 TD 65536  
 SOLVENT CDC13  
 NS 16  
 DS 0  
 SWH 8992.806 Hz  
 FIDRES 0.137219 Hz  
 AQ 3.6438515 sec  
 RG 203.2  
 DW 55.600 usec  
 DE 6.00 usec  
 TE 300.2 K  
 D1 5.00000000 sec

==== CHANNEL f1 =====

NUC1 1H  
 P1 10.60 usec  
 PL1 -1.00 dB  
 SFO1 300.1318534 MHz

F2 - Processing parameters

SI 32768  
 SF 300.1300062 MHz  
 WDW EM  
 SSB 0  
 LB 0.35 Hz  
 GB 0  
 PC 1.00

1D NMR plot parameters

CX 22.00 cm  
 CY 30.00 cm  
 F1P 9.000 ppm  
 F1 2701.17 Hz  
 F2P -0.200 ppm  
 F2 -60.03 Hz  
 PPMCM 0.41818 ppm/cm  
 HZCM 125.50892 Hz/cm

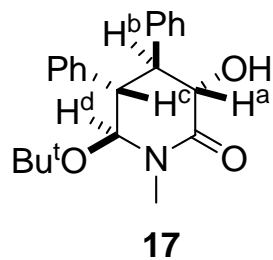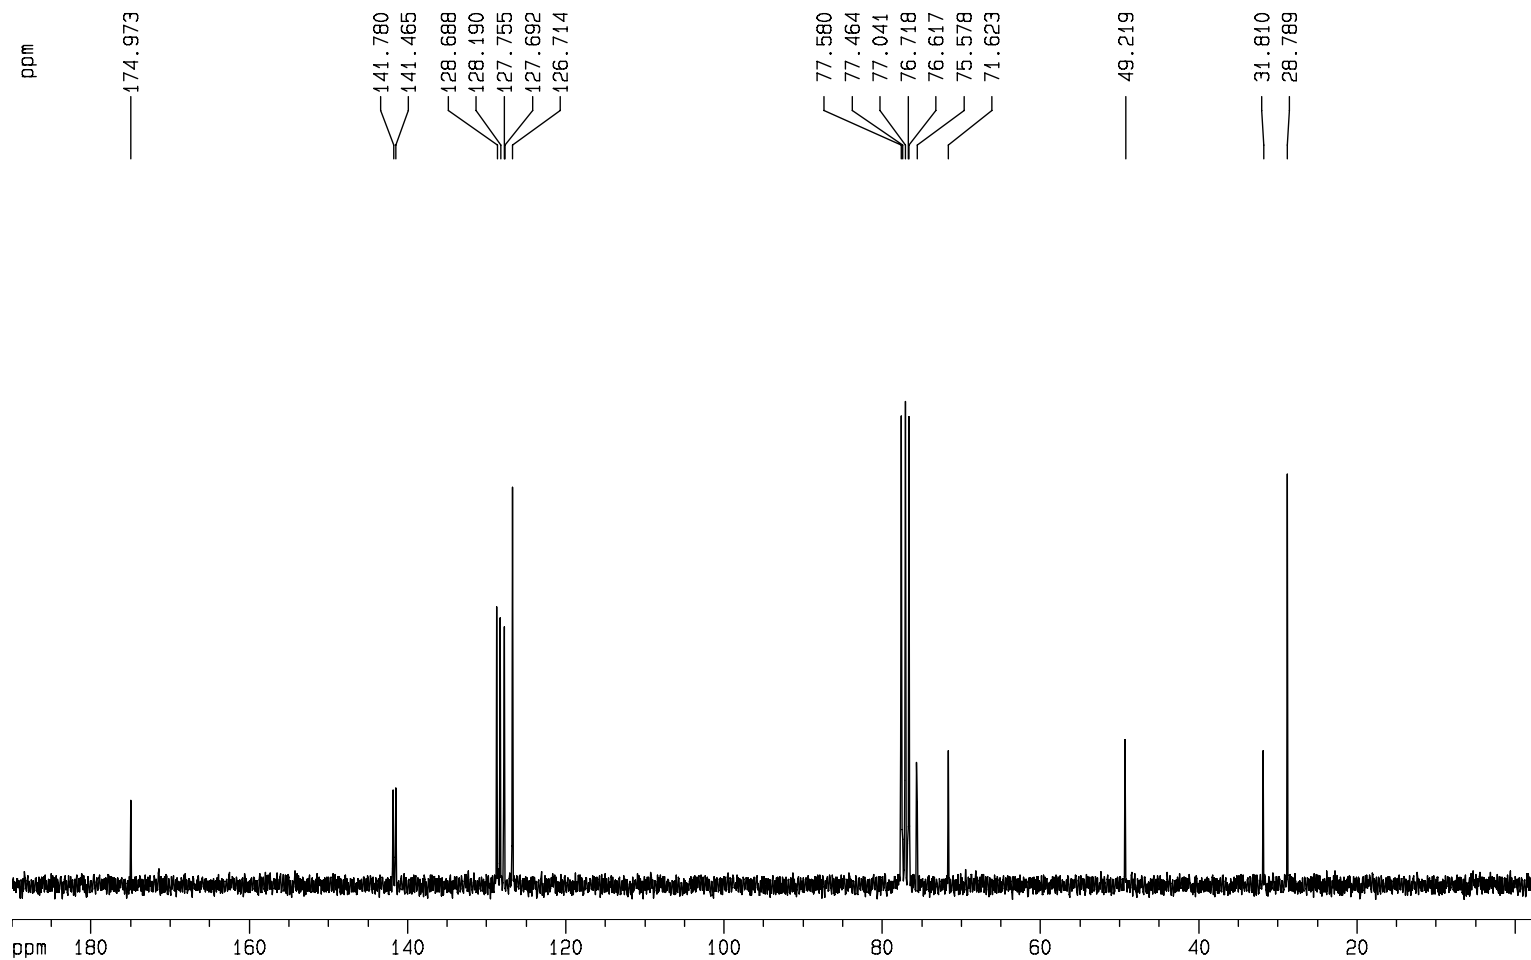

Current Data Parameters  
 NAME y1055-a  
 EXPNO 4  
 PROCNO 1

F2 - Acquisition Parameters  
 Date\_ 20070511  
 Time 11.22  
 INSTRUM av300  
 PROBHD 5 mm DUL 13C-1  
 PULPROG zgpg30  
 TD 65536  
 SOLVENT CDCl3  
 NS 157  
 DS 4  
 SWH 17985.611 Hz  
 FIDRES 0.274439 Hz  
 AQ 1.8219508 sec  
 RG 6502  
 DW 27.800 usec  
 DE 6.00 usec  
 TE 298.9 K  
 D1 2.0000000 sec  
 d11 0.0300000 sec  
 d12 0.00002000 sec

===== CHANNEL f1 =====  
 NUC1 13C  
 P1 14.20 usec  
 PL1 -5.00 dB  
 SF01 75.4752953 MHz

===== CHANNEL f2 =====  
 CPDPRG2 waltz16  
 NUC2 1H  
 PCPD2 80.00 usec  
 PL2 -1.00 dB  
 PL12 16.56 dB  
 PL13 16.00 dB  
 SF02 300.1312005 MHz

F2 - Processing parameters  
 SI 32768  
 SF 75.4677490 MHz  
 WDW EM  
 SSB 0  
 LB 1.00 Hz  
 GB 0  
 PC 1.40

1D NMR plot parameters  
 CX 22.00 cm  
 CY 7.00 cm  
 F1P 190.000 ppm  
 F1 14338.87 Hz  
 F2P -2.000 ppm  
 F2 -150.94 Hz  
 PPMCM 8.72727 ppm/cm  
 HZCM 658.62756 Hz/cm



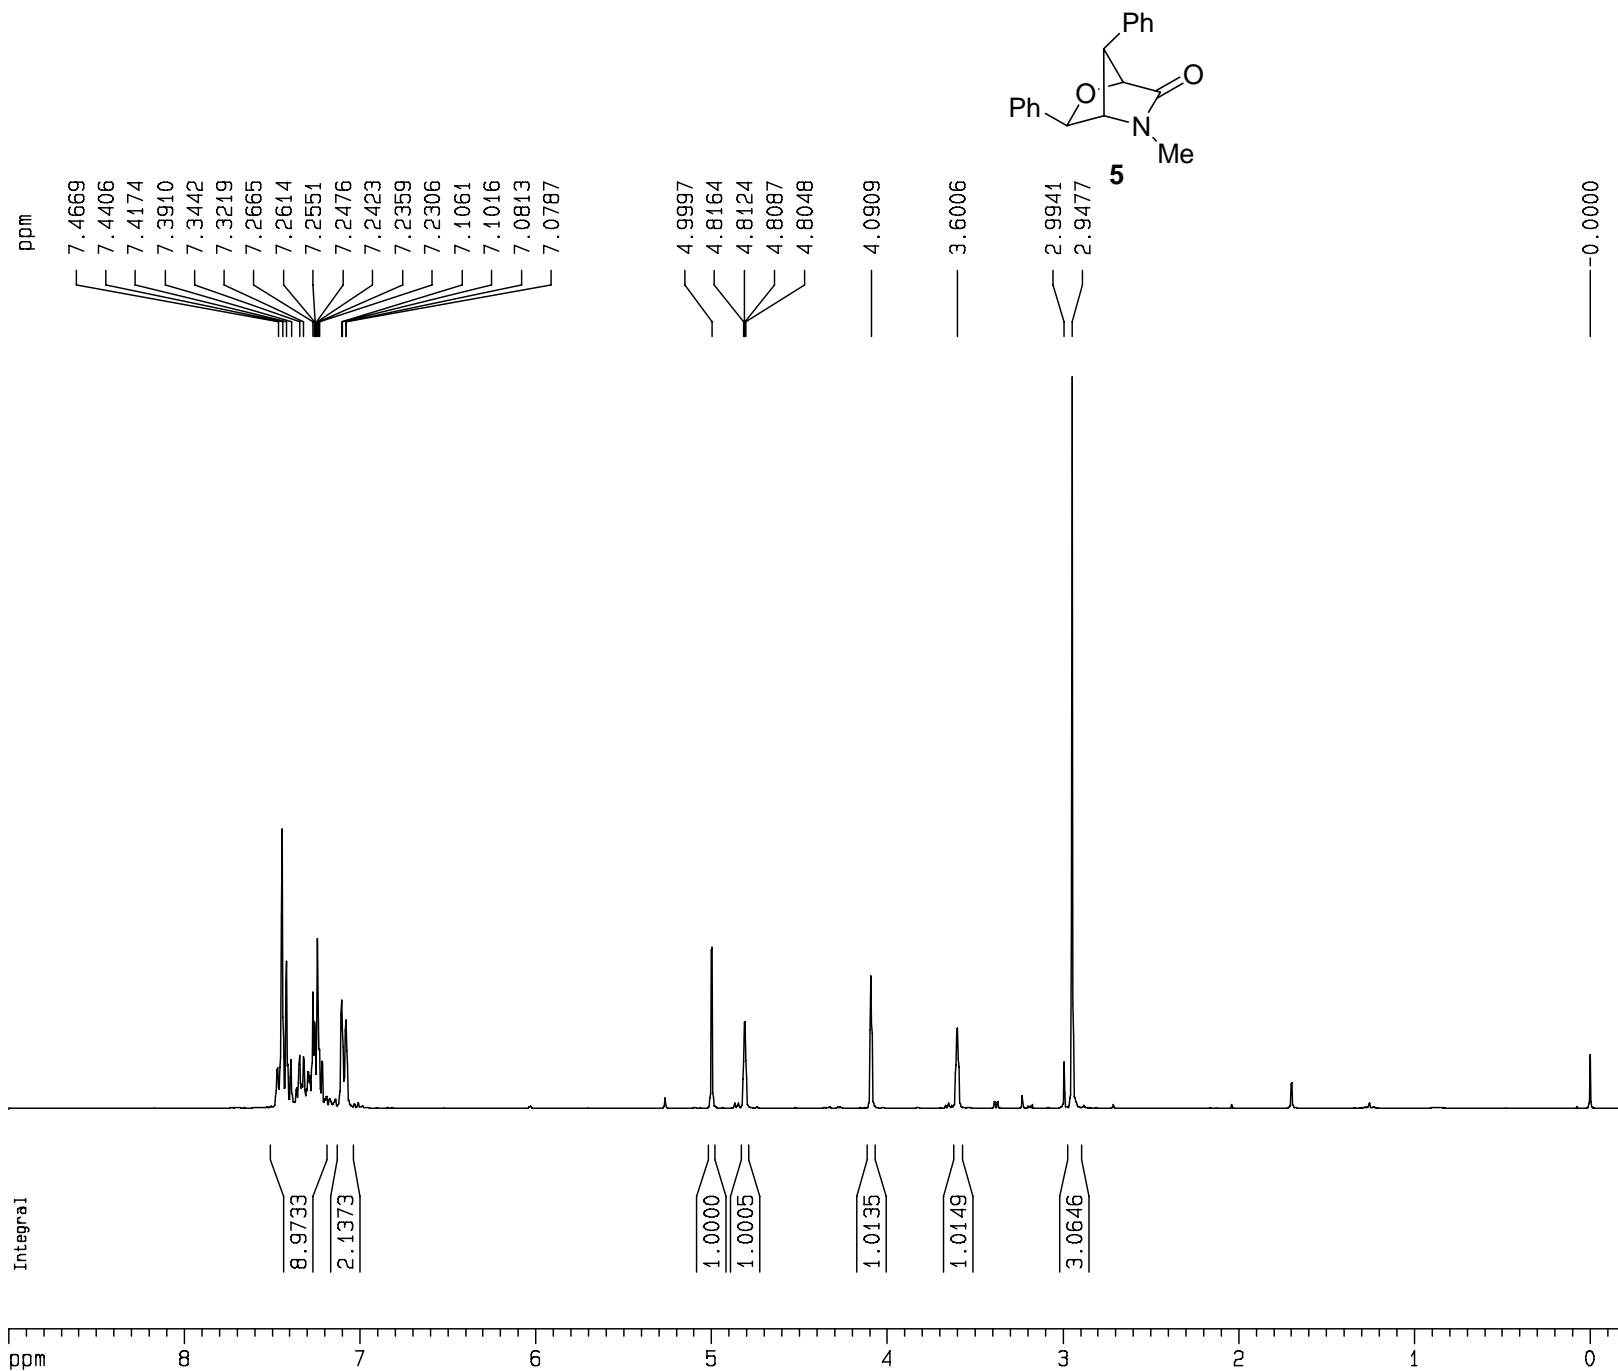

Current Data Parameters

NAME y1055-0  
EXPNO 2  
PROCNO 1

F2 - Acquisition Parameters

Date\_ 20070409  
Time 11.48  
INSTRUM av300  
PROBHD 5 mm DUL 13C-1  
PULPROG zg30  
TD 65536  
SOLVENT CDCl3  
NS 16  
DS 0  
SWH 8992.806 Hz  
FIDRES 0.137219 Hz  
AQ 3.6438515 sec  
RG 228.1  
DW 55.600 usec  
DE 6.00 usec  
TE 297.9 K  
D1 5.00000000 sec

==== CHANNEL f1 =====

NUC1 1H  
P1 9.30 usec  
PL1 -1.00 dB  
SF01 300.1318534 MHz

F2 - Processing parameters

SI 32768  
SF 300.1300077 MHz  
WDW EM  
SSB 0  
LB 0.35 Hz  
GB 0  
PC 1.00

1D NMR plot parameters

CX 22.00 cm  
CY 10.00 cm  
F1P 9.000 ppm  
F1 2701.17 Hz  
F2P -0.200 ppm  
F2 -60.03 Hz  
PPMCM 0.41818 ppm/cm  
HZCM 125.50892 Hz/cm

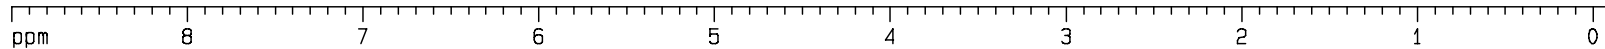

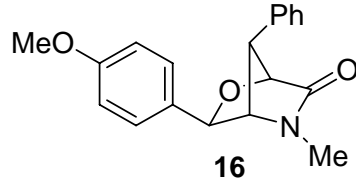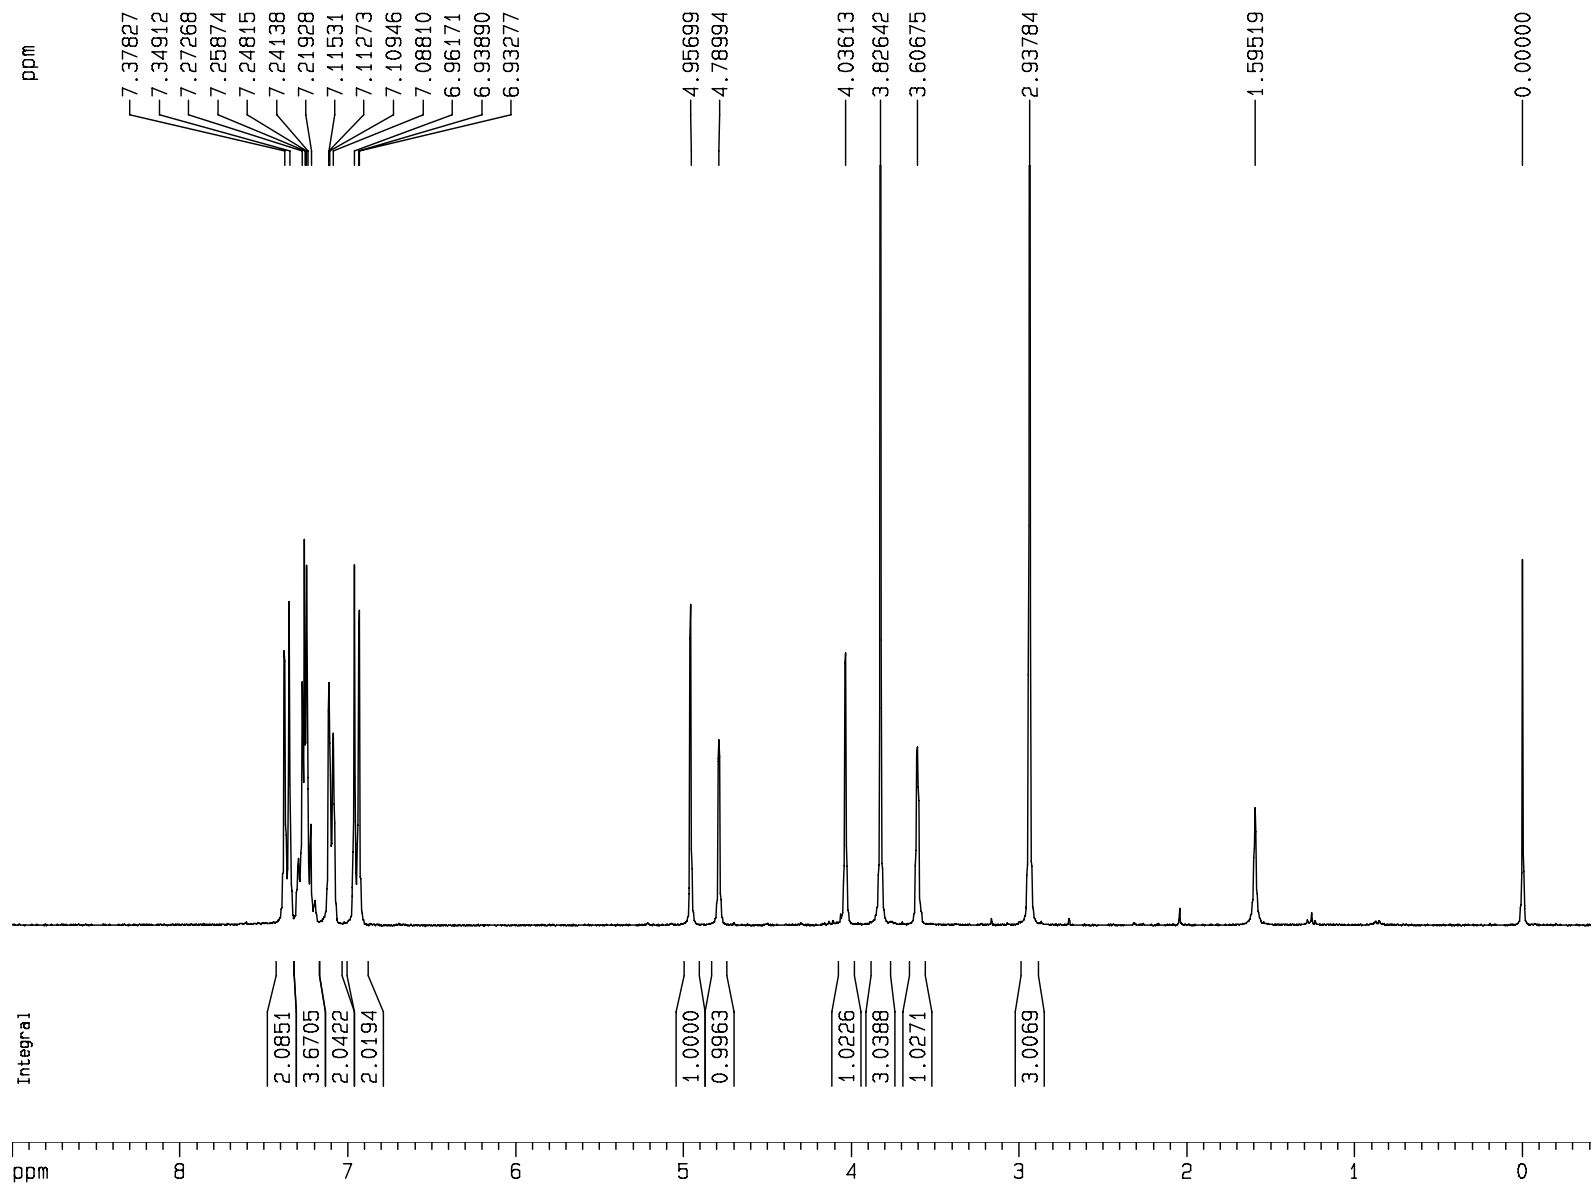

Current Data Parameters

NAME y1003-4-0  
EXPNO 10  
PROCNO 1

F2 - Acquisition Parameters

Date\_ 20070419  
Time 19.33  
INSTRUM av300  
PROBHD 5 mm DUL 13C-1  
PULPROG zg30  
TD 65536  
SOLVENT CDC13  
NS 16  
DS 0  
SWH 8992.806 Hz  
FIDRES 0.137219 Hz  
AQ 3.6438515 sec  
RG 574.7  
DW 55.600 usec  
DE 6.00 usec  
TE 300.1 K  
D1 5.00000000 sec

===== CHANNEL f1 =====

NUC1 1H  
P1 9.30 usec  
PL1 -1.00 dB  
SF01 300.1318534 MHz

F2 - Processing parameters

SI 32768  
SF 300.1300065 MHz  
WDW EM  
SSB 0  
LB 0.35 Hz  
GB 0  
PC 1.00

1D NMR plot parameters

CX 22.00 cm  
CY 20.00 cm  
F1P 9.000 ppm  
F1 2701.17 Hz  
F2P -0.500 ppm  
F2 -150.07 Hz  
PPMCM 0.43182 ppm/cm  
HZCM 129.60159 Hz/cm

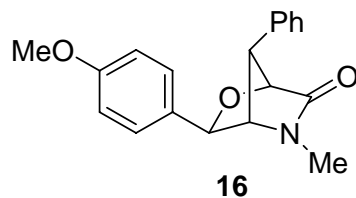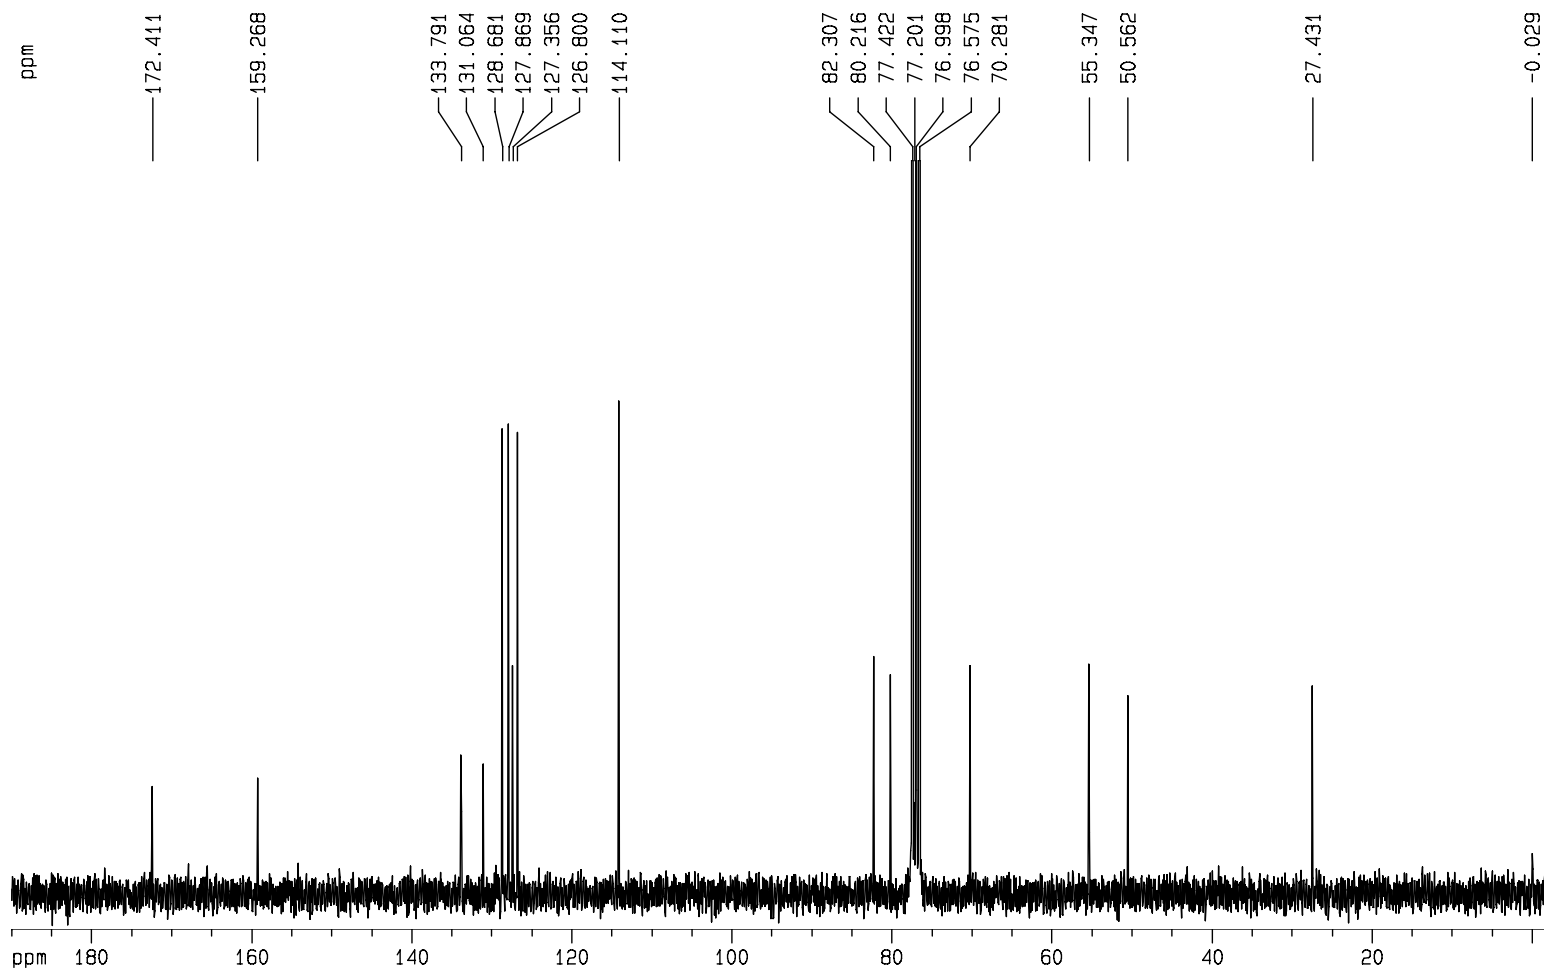

Current Data Parameters  
 NAME y1003-4-0  
 EXPNO 3  
 PROCNO 1

F2 - Acquisition Parameters  
 Date\_ 20070420  
 Time 11.33  
 INSTRUM av300  
 PROBHD 5 mm DUL 13C-1  
 PULPROG zgpg30  
 TD 65536  
 SOLVENT CDCl3  
 NS 717  
 DS 4  
 SWH 17985.611 Hz  
 FIDRES 0.274439 Hz  
 AQ 1.8219508 sec  
 RG 1448.2  
 DW 27.800 usec  
 DE 6.00 usec  
 TE 300.3 K  
 D1 2.00000000 sec  
 d11 0.03000000 sec  
 d12 0.00002000 sec

===== CHANNEL f1 =====  
 NUC1 13C  
 P1 9.40 usec  
 PL1 -1.00 dB  
 SFO1 75.4752953 MHz

===== CHANNEL f2 =====  
 CPDPRG2 waltz16  
 NUC2 1H  
 PCPD2 80.00 usec  
 PL2 -1.00 dB  
 PL12 18.00 dB  
 PL13 18.00 dB  
 SFO2 300.1312005 MHz

F2 - Processing parameters  
 SI 32768  
 SF 75.4677490 MHz  
 WDW EM  
 SSB 0  
 LB 1.00 Hz  
 GB 0  
 PC 1.40

1D NMR plot parameters  
 CX 22.00 cm  
 CY 30.00 cm  
 F1P 190.000 ppm  
 F1 14338.87 Hz  
 F2P -2.000 ppm  
 F2 -150.94 Hz  
 PPMCM 8.72727 ppm/cm  
 HZCM 658.62756 Hz/cm

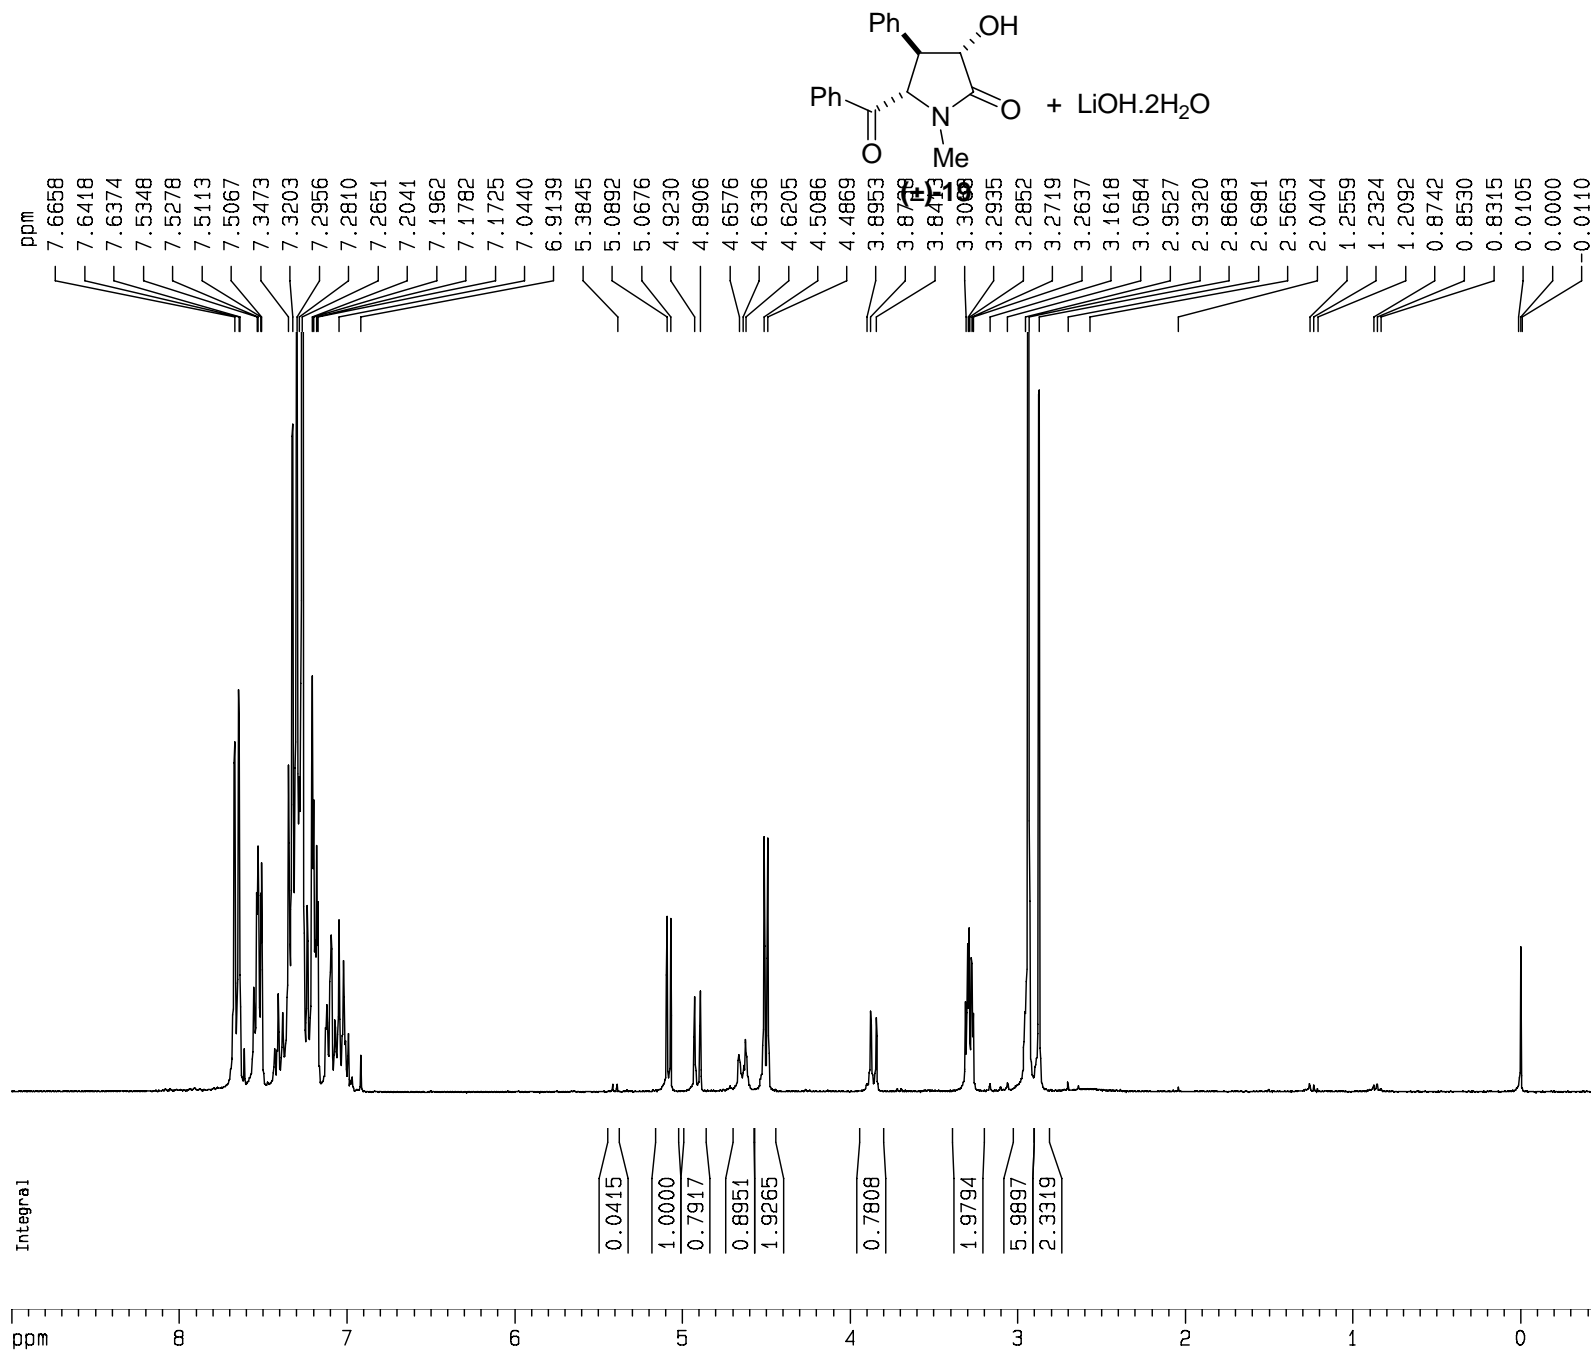

Current Data Parameters  
 NAME y1157-1  
 EXPNO 30  
 PROCNO 1

F2 - Acquisition Parameters  
 Date\_ 20081017  
 Time 7.58  
 INSTRUM spect  
 PROBHD 5 mm DUL 13C-1  
 PULPROG zg30  
 TD 65536  
 SOLVENT CDCl3  
 NS 16  
 DS 0  
 SWH 8992.806 Hz  
 FIDRES 0.137219 Hz  
 AQ 3.6438515 sec  
 RG 287.4  
 JW 55.600 usec  
 DE 6.00 usec  
 TE 300.9 K  
 D1 1.0000000 sec  
 MCREST 0.0000000 sec  
 MCWAK 0.0150000 sec

==== CHANNEL f1 =====  
 NUC1 1H  
 P1 7.00 usec  
 PL1 -1.00 dB  
 SF01 300.1324010 MHz

F2 - Processing parameters  
 SI 32768  
 SF 300.1300046 MHz  
 ADW EM  
 SSB 0  
 LB 0.30 Hz  
 GB 0  
 PC 1.00

1D NMR plot parameters  
 CX 22.00 cm  
 CY 90.00 cm  
 F1P 9.000 ppm  
 F1 2701.17 Hz  
 F2P -0.500 ppm  
 F2 -150.07 Hz  
 PPMCM 0.43182 ppm/cm  
 HZCM 129.60159 Hz/cm

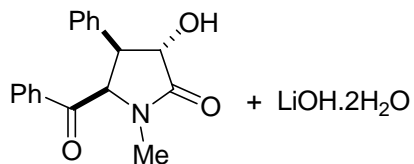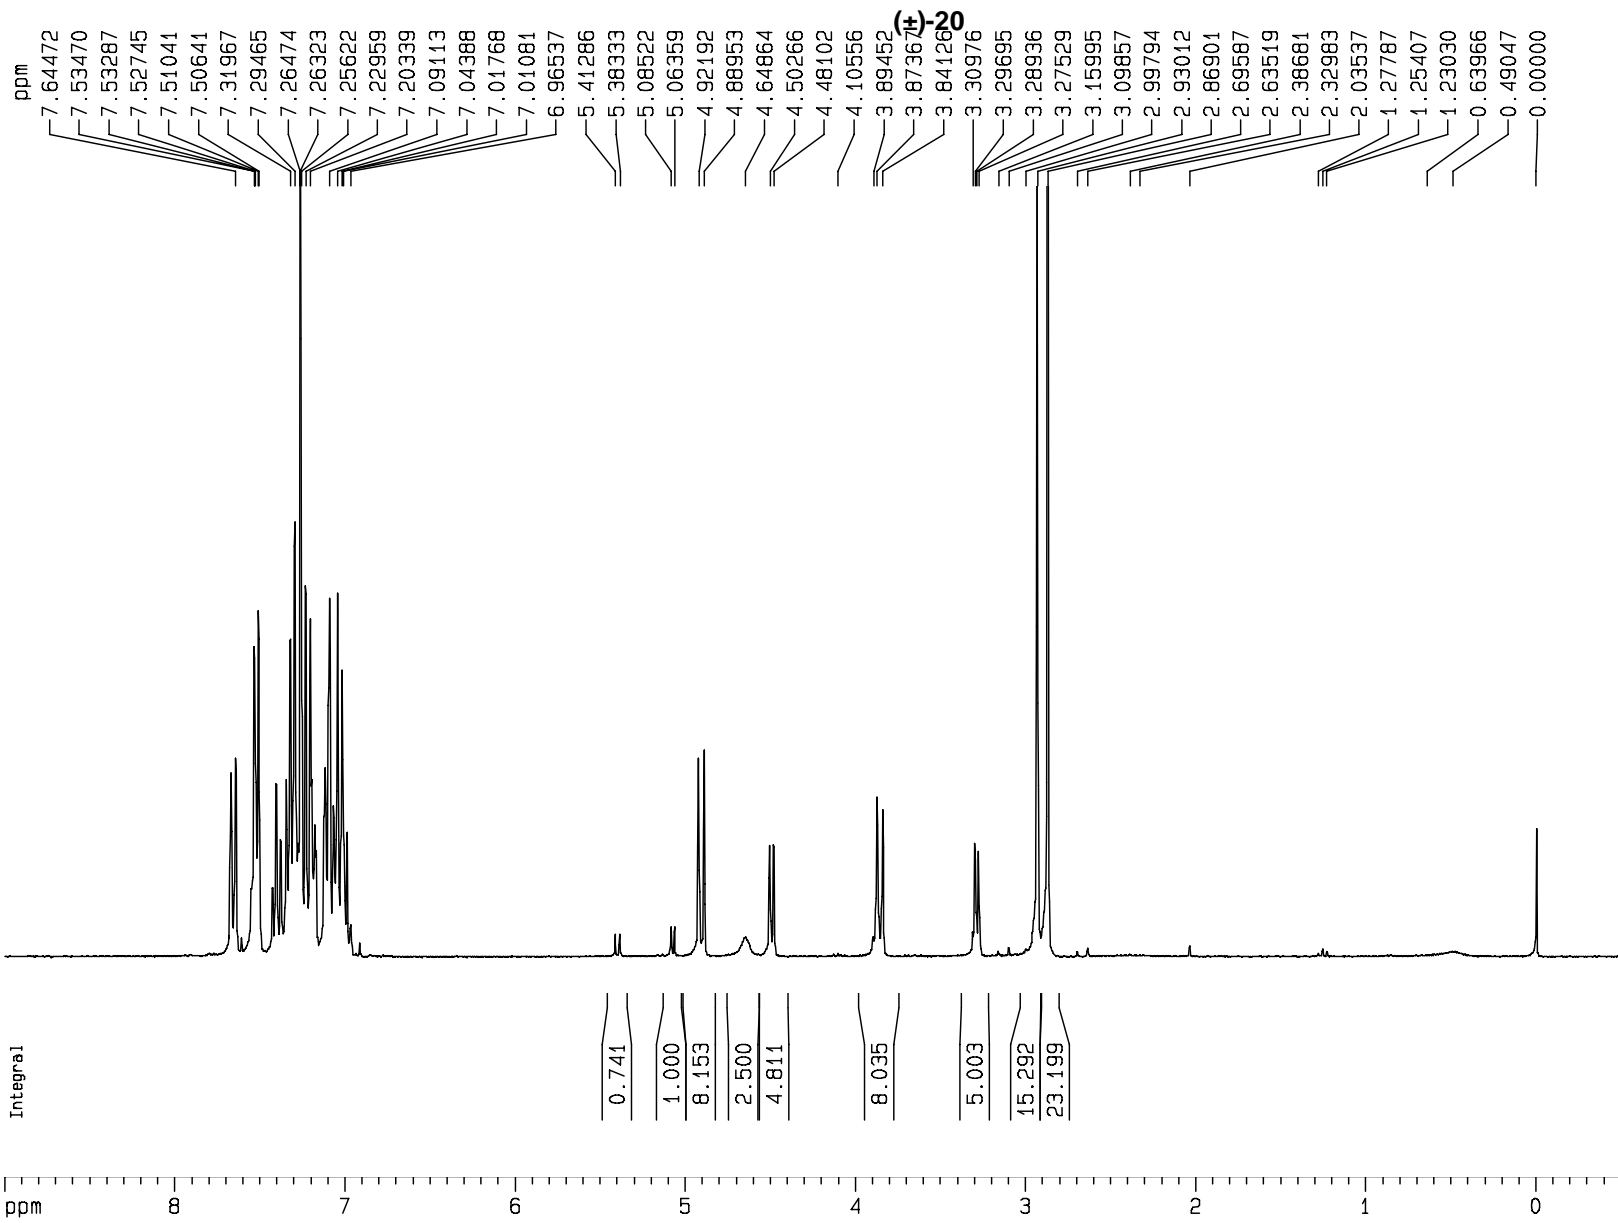

Current Data Parameters  
 NAME yl157-2  
 EXPNO 9  
 PROCNO 1

F2 - Acquisition Parameters  
 Date\_ 20081017  
 Time 7.47  
 INSTRUM spect  
 PROBHD 5 mm DUL 13C-1  
 PULPROG zg30  
 TD 65536  
 SOLVENT CDC13  
 NS 16  
 DS 0  
 SWH 8992.806 Hz  
 FIDRES 0.137219 Hz  
 AQ 3.6438515 sec  
 RG 362  
 DW 55.600 usec  
 DE 6.00 usec  
 TE 302.9 K  
 D1 1.00000000 sec  
 MCREST 0.00000000 sec  
 MCWRK 0.01500000 sec

===== CHANNEL f1 =====  
 NUC1 1H  
 P1 7.00 usec  
 PL1 -1.00 dB  
 SF01 300.1324010 MHz

F2 - Processing parameters  
 SI 32768  
 SF 300.1300047 MHz  
 WDW EM  
 SSB 0  
 LB 0.30 Hz  
 GB 0  
 PC 1.00

1D NMR plot parameters  
 CX 22.00 cm  
 CY 20.00 cm  
 F1P 9.000 ppm  
 F1 2701.17 Hz  
 F2P -0.500 ppm  
 F2 -150.07 Hz  
 PPMCM 0.43182 ppm/cm  
 HZCM 129.60159 Hz/cm

After the conversion of ( $\pm$ )19 into ( $\pm$ )20, before chromatography.

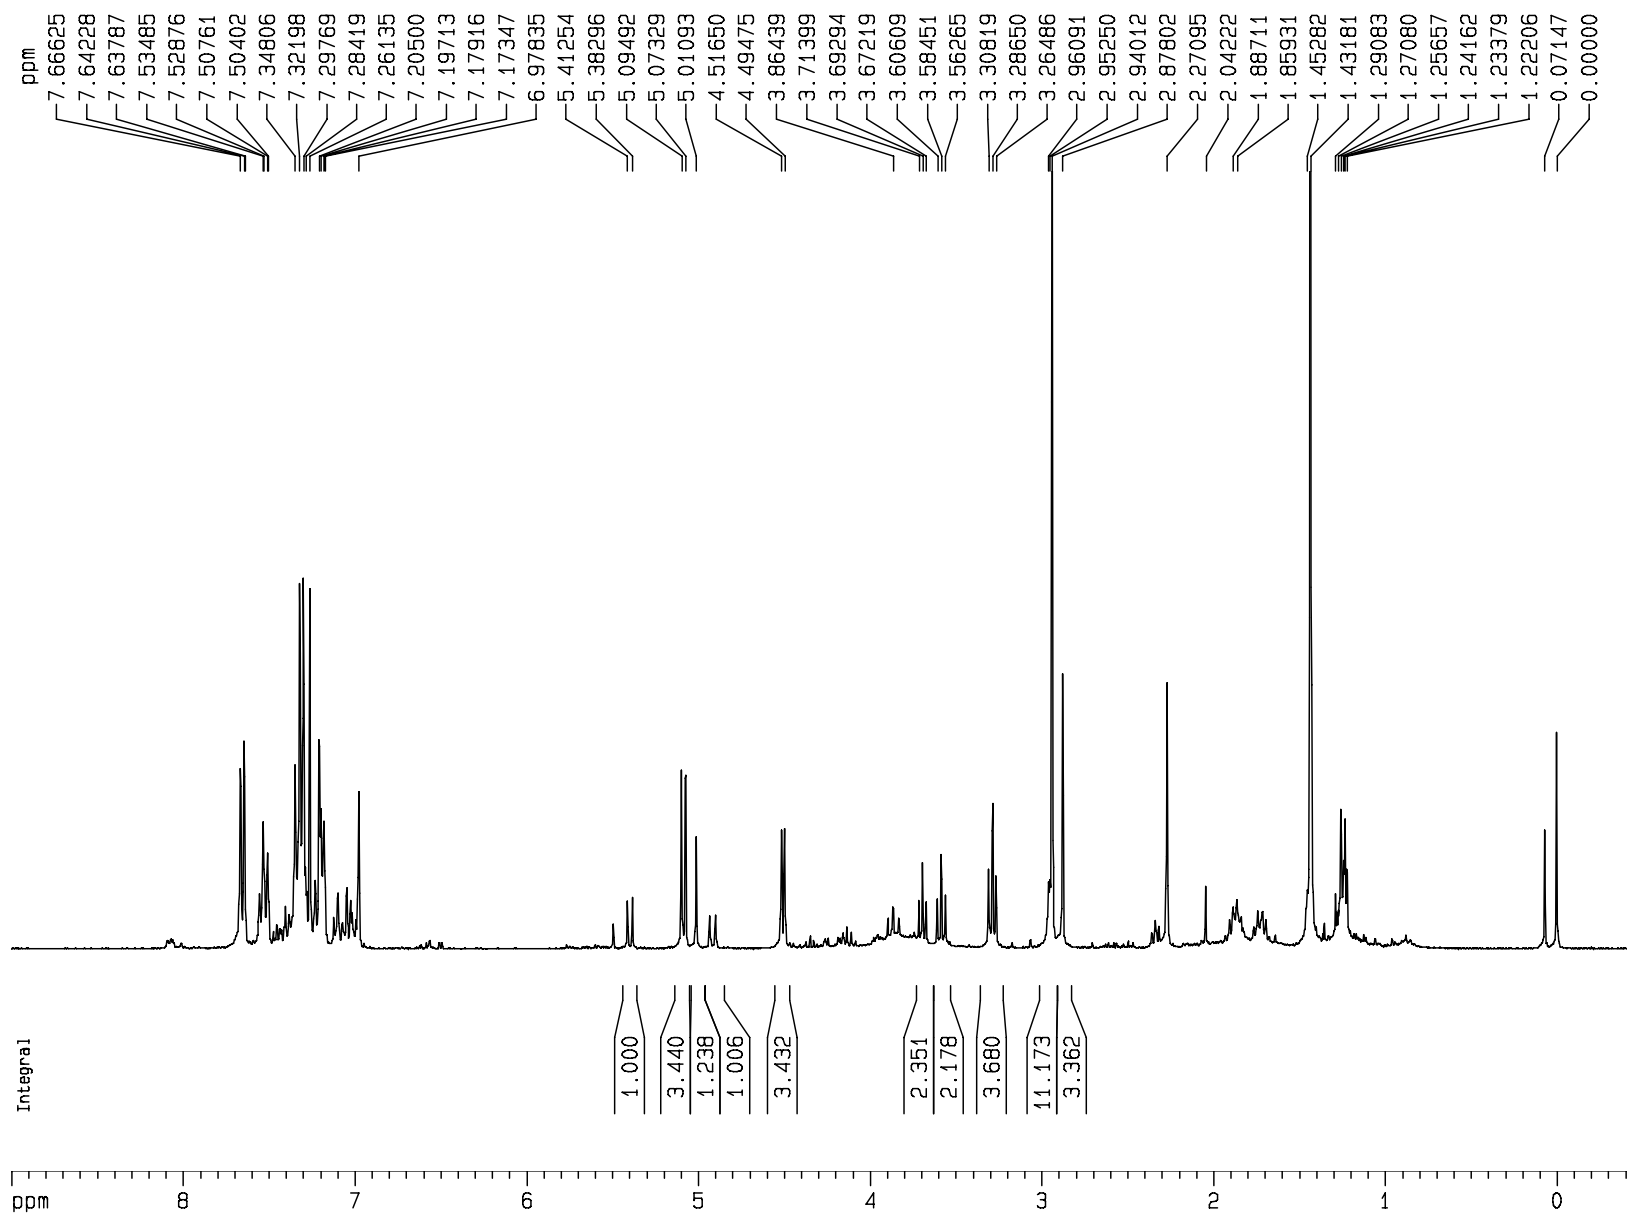

Current Data Parameters

NAME y1157-1  
EXPNO 7  
PROCNO 1

F2 - Acquisition Parameters

Date\_ 20081026  
Time 10.32  
INSTRUM spect  
PROBHD 5 mm DUL 13C-1  
PULPROG zg30  
TD 65536  
SOLVENT CDC13  
VS 16  
DS 0  
SWH 8992.806 Hz  
FIDRES 0.137219 Hz  
AQ 3.6438515 sec  
RG 228.1  
DW 55.600 usec  
DE 6.00 usec  
TE 299.0 K  
D1 1.00000000 sec  
VCREST 0.00000000 sec  
VCWRK 0.01500000 sec

===== CHANNEL f1 =====

NUC1 1H  
P1 7.00 usec  
PL1 -1.00 dB  
SFO1 300.1324010 MHz

F2 - Processing parameters

SI 32768  
SF 300.1300055 MHz  
WDW EM  
SSB 0  
LB 0.30 Hz  
GB 0  
PC 1.00

1D NMR plot parameters

CX 22.00 cm  
CY 30.00 cm  
F1P 9.000 ppm  
F1 2701.17 Hz  
F2P -0.500 ppm  
F2 -150.07 Hz  
PPMCM 0.43182 ppm/cm  
HZCM 129.60159 Hz/cm
